# Supplementary material
Source: publisher site journal article supplement (https://neobiota.pensoft.net/article/59132/download/suppl/31/)
Supplement: Supplementary file 1

## Sheet: Basic_data
	Cost_ID	Repository	Reference_ID	Reference_title	Authors	Abstract	Publication_year	Language	Type_of_material	Previous_materials	Availability	Kingdom	Phylum	Class	Order	Family	Genus	Species	Subspecies	Common_name	Environment	Environment_IAS	Island	verbatimHabitat	Habitat	protectedArea	Geographic_region	Official_country	State|Province|Administrative_area	Location	Spatial_scale	Period_of_estimation	Time_range	Probable_starting_year	Probable_ending_year	Probable_starting_year_adjusted	Probable_ending_year_adjusted	Occurrence	Raw_cost_estimate_local_currency	Min_Raw_cost_estimate_local_currency	Max_Raw_cost_estimate_local_currency	Raw_cost_estimate_2017_USD_exchange_rate	Raw_cost_estimate_2017_USD_PPP	Cost_estimate_per_year_local_currency	Cost_estimate_per_year_2017_USD_exchange_rate	Cost_estimate_per_year_2017_USD_PPP	Currency	Applicable_year	Type_of_applicable_year
1	181	WoS	12448	Costing eradications of alien mammals from islands	Martins et al	NA	2006	English	Peer-reviewed article	NA	Yes	Animalia	Chordata	Mammalia	Rodentia	Muridae	Rattus	Rattus sp.	NA	Rats	Terrestrial	terrestrial	NA	NA	NA	NA	Africa	Seychelles	NA	Bird	Site	1996	Year	1996	NA	1996	1996	Potentially ongoing	5169	NA	NA	6887.55	11419.7	5169	6887.55	11419.7	USD	2003	Effective
2	186	WoS	12448	Costing eradications of alien mammals from islands	Martins et al	NA	2006	English	Peer-reviewed article	NA	Yes	Animalia	Chordata	Mammalia	Rodentia	Muridae	Rattus	Rattus sp.	NA	Rats	Terrestrial	terrestrial	NA	NA	NA	NA	Africa	Seychelles	NA	Curieuse	Site	2000	Year	2000	NA	2000	2000	Potentially ongoing	67290	NA	NA	89662.1	148661	67290	89662.1	148661	USD	2003	Effective
3	188	WoS	12448	Costing eradications of alien mammals from islands	Martins et al	NA	2006	English	Peer-reviewed article	NA	Yes	Animalia	Chordata	Mammalia	Rodentia	Muridae	Rattus	Rattus sp.	NA	Rats	Terrestrial	terrestrial	NA	NA	NA	NA	Africa	Seychelles	NA	Denis Island	Site	2000	Year	2000	NA	2000	2000	Potentially ongoing	56994	NA	NA	75943	125915	56994	75943	125915	USD	2003	Effective
4	194	WoS	12448	Costing eradications of alien mammals from islands	Martins et al	NA	2006	English	Peer-reviewed article	NA	Yes	Animalia	Chordata	Mammalia	Rodentia	Muridae	Rattus	Rattus sp.	NA	Rats	Terrestrial	terrestrial	NA	NA	NA	NA	Africa	Mauritius	NA	Flat	Site	1998	Year	1998	NA	1998	1998	Potentially ongoing	64381	NA	NA	85786	183257	64381	85786	183257	USD	2003	Effective
5	195	WoS	12448	Costing eradications of alien mammals from islands	Martins et al	NA	2006	English	Peer-reviewed article	NA	Yes	Animalia	Chordata	Mammalia	Rodentia	Muridae	Rattus	Rattus sp.	NA	Rats	Terrestrial	terrestrial	NA	NA	NA	NA	Africa	Seychelles	NA	Fregate	Site	2000	Year	2000	NA	2000	2000	Potentially ongoing	61916	NA	NA	82501.4	136789	61916	82501.4	136789	USD	2003	Effective
6	212	WoS	12448	Costing eradications of alien mammals from islands	Martins et al	NA	2006	English	Peer-reviewed article	NA	Yes	Animalia	Chordata	Mammalia	Lagomorpha	Leporidae	Oryctolagus	Oryctolagus cuniculus	NA	European (common) rabbit	Terrestrial	terrestrial	NA	NA	NA	NA	Africa	Mauritius	NA	Round	Site	1986	Year	1986	NA	1986	1986	Potentially ongoing	48286	NA	NA	64339.8	137444	48286	64339.8	137444	USD	2003	Effective
7	586	GS	307	Invasive alien species: a toolkit of best prevention and management practices	Wittenberg and Cock	NA	2001	English	Book	NA	Yes	Animalia	Chordata	Mammalia	Rodentia	Muridae	Rattus	Rattus norvegicus/Rattus rattus	NA	Brown rat/Black rat	Terrestrial	terrestrial	NA	NA	NA	NA	Africa	Seychelles	NA	Some islands	Site	May-August 2000	Year	2000	2000	2000	2000	One-time	250000	NA	NA	355865	686787	250000	355865	686787	USD	2000	Effective
8	594	WoS	9426	Economic valuation of the influence of invasive alien species on the economy of the Seychelles islands	Mwebaze et al	NA	2010	English	Peer-reviewed article	NA	Yes	Animalia	Chordata	Mammalia	Diverse/Unspecified	Diverse/Unspecified	Diverse/Unspecified	Diverse/Unspecified	NA	Alien mammal predators (rat/feral cat/goat/pigs)	Terrestrial	terrestrial	NA	NA	NA	NA	Africa	Seychelles	NA	NA	Country	2009-2013	Year	2009	2013	2009	2013	Potentially ongoing	86415000	NA	NA	9.71404e+07	1.7939e+08	86415000	9.71404e+07	1.7939e+08	USD	2010	Publication year
9	595	WoS	9426	Economic valuation of the influence of invasive alien species on the economy of the Seychelles islands	Mwebaze et al	NA	2010	English	Peer-reviewed article	NA	Yes	Animalia	Chordata	Mammalia	Diverse/Unspecified	Diverse/Unspecified	Diverse/Unspecified	Diverse/Unspecified	NA	Alien mammal predators (rat/feral cat/goat/pigs)	Terrestrial	terrestrial	NA	NA	NA	NA	Africa	Seychelles	NA	NA	Country	2009-2013	Year	2009	2013	2009	2013	Potentially ongoing	21000000	NA	NA	2.36064e+07	4.35942e+07	21000000	2.36064e+07	4.35942e+07	USD	2010	Publication year
10	596	WoS	9426	Economic valuation of the influence of invasive alien species on the economy of the Seychelles islands	Mwebaze et al	NA	2010	English	Peer-reviewed article	NA	Yes	Animalia	Chordata	Mammalia	Diverse/Unspecified	Diverse/Unspecified	Diverse/Unspecified	Diverse/Unspecified	NA	Alien mammal predators (rat/feral cat/goat/pigs)	Terrestrial	terrestrial	NA	NA	NA	NA	Africa	Seychelles	NA	NA	Country	2009-2013	Year	2009	2013	2009	2013	One-time	255000	NA	NA	286649	529358	255000	286649	529358	USD	2010	Publication year
11	644	WoS	9426	Economic valuation of the influence of invasive alien species on the economy of the Seychelles islands	Mwebaze et al	NA	2010	English	Peer-reviewed article	NA	Yes	Animalia	Chordata	Mammalia	Diverse/Unspecified	Diverse/Unspecified	Diverse/Unspecified	Diverse/Unspecified	NA	Mammals	Aquatic/Terrestrial	diverse/Unspecified	NA	NA	NA	NA	Africa	Seychelles	NA	NA	Country	2010	Year	2010	NA	2010	2010	Potentially ongoing	474000	NA	NA	532831	983982	474000	532831	983982	USD	2010	Publication year
12	645	WoS	9426	Economic valuation of the influence of invasive alien species on the economy of the Seychelles islands	Mwebaze et al	NA	2010	English	Peer-reviewed article	NA	Yes	Animalia	Chordata	Mammalia	Diverse/Unspecified	Diverse/Unspecified	Diverse/Unspecified	Diverse/Unspecified	NA	Mammals	Aquatic/Terrestrial	diverse/Unspecified	NA	NA	NA	NA	Africa	Seychelles	NA	NA	Country	2010	Year	2010	NA	2010	2010	Potentially ongoing	1482000	NA	NA	1.66594e+06	3.0765e+06	1482000	1.66594e+06	3.0765e+06	USD	2010	Publication year
13	646	WoS	9426	Economic valuation of the influence of invasive alien species on the economy of the Seychelles islands	Mwebaze et al	NA	2010	English	Official report	NA	Yes	Animalia	Chordata	Mammalia	Diverse/Unspecified	Diverse/Unspecified	Diverse/Unspecified	Diverse/Unspecified	NA	Mammals	Aquatic/Terrestrial	diverse/Unspecified	NA	NA	NA	NA	Africa	Seychelles	NA	NA	Country	2010	Year	2010	NA	2010	2010	Potentially ongoing	118000	NA	NA	132646	244958	118000	132646	244958	USD	2010	Publication year
14	647	TC	174	An economic assessment of Seychelles biodiversity	Murray and Henri	NA	2005	English	Official report	Mwebaze, P., MacLeod, A., Tomlinson, D., Barois, H., & Rijpma, J. (2010). Economic valuation of the influence of invasive alien species on the economy of the Seychelles islands. Ecological Economics, 69(12), 2614â€“2623. https://doi.org/10.1016/j.ecolecon.2010.08.009	No	Animalia	Chordata	Mammalia	Diverse/Unspecified	Diverse/Unspecified	Diverse/Unspecified	Diverse/Unspecified	NA	Mammals (notably rats and feral cats)	Aquatic/Terrestrial	diverse/Unspecified	NA	NA	NA	NA	Africa	Seychelles	NA	NA	Country	2005	Year	2005	NA	2005	2005	Potentially ongoing	60000	NA	NA	75308.8	107675	60000	75308.8	107675	USD	2005	Publication year
15	648	TC	174	An economic assessment of Seychelles biodiversity	Murray and Henri	NA	2005	English	Official report	Mwebaze, P., MacLeod, A., Tomlinson, D., Barois, H., & Rijpma, J. (2010). Economic valuation of the influence of invasive alien species on the economy of the Seychelles islands. Ecological Economics, 69(12), 2614â€“2623. https://doi.org/10.1016/j.ecolecon.2010.08.010	No	Animalia	Chordata	Mammalia	Diverse/Unspecified	Diverse/Unspecified	Diverse/Unspecified	Diverse/Unspecified	NA	Mammals (notably rats and feral cats)	Aquatic/Terrestrial	diverse/Unspecified	NA	NA	NA	NA	Africa	Seychelles	NA	NA	Country	2005	Year	2005	NA	2005	2005	Potentially ongoing	93000	NA	NA	116729	166897	93000	116729	166897	USD	2005	Publication year
16	649	TC	174	An economic assessment of Seychelles biodiversity	Murray and Henri	NA	2005	English	Official report	Mwebaze, P., MacLeod, A., Tomlinson, D., Barois, H., & Rijpma, J. (2010). Economic valuation of the influence of invasive alien species on the economy of the Seychelles islands. Ecological Economics, 69(12), 2614â€“2623. https://doi.org/10.1016/j.ecolecon.2010.08.011	No	Animalia	Chordata	Mammalia	Diverse/Unspecified	Diverse/Unspecified	Diverse/Unspecified	Diverse/Unspecified	NA	Mammals (notably rats and feral cats)	Aquatic/Terrestrial	diverse/Unspecified	NA	NA	NA	NA	Africa	Seychelles	NA	NA	Country	2005	Year	2005	NA	2005	2005	Potentially ongoing	9000	NA	NA	11296.3	16151.3	9000	11296.3	16151.3	USD	2005	Publication year
17	650	TC	174	An economic assessment of Seychelles biodiversity	Murray and Henri	NA	2005	English	Official report	Mwebaze, P., MacLeod, A., Tomlinson, D., Barois, H., & Rijpma, J. (2010). Economic valuation of the influence of invasive alien species on the economy of the Seychelles islands. Ecological Economics, 69(12), 2614â€“2623. https://doi.org/10.1016/j.ecolecon.2010.08.012	No	Animalia	Chordata	Mammalia	Diverse/Unspecified	Diverse/Unspecified	Diverse/Unspecified	Diverse/Unspecified	NA	Mammals (notably rats and feral cats)	Aquatic/Terrestrial	diverse/Unspecified	NA	NA	NA	NA	Africa	Seychelles	NA	NA	Country	2005	Year	2005	NA	2005	2005	Potentially ongoing	17000	NA	NA	21337.5	30508	17000	21337.5	30508	USD	2005	Publication year
18	651	TC	174	An economic assessment of Seychelles biodiversity	Murray and Henri	NA	2005	English	Official report	Mwebaze, P., MacLeod, A., Tomlinson, D., Barois, H., & Rijpma, J. (2010). Economic valuation of the influence of invasive alien species on the economy of the Seychelles islands. Ecological Economics, 69(12), 2614â€“2623. https://doi.org/10.1016/j.ecolecon.2010.08.013	No	Animalia	Chordata	Mammalia	Diverse/Unspecified	Diverse/Unspecified	Diverse/Unspecified	Diverse/Unspecified	NA	Mammals (notably rats and feral cats)	Aquatic/Terrestrial	diverse/Unspecified	NA	NA	NA	NA	Africa	Seychelles	NA	NA	Country	2005	Year	2005	NA	2005	2005	Potentially ongoing	51000	NA	NA	64012.5	91524.1	51000	64012.5	91524.1	USD	2005	Publication year
19	681	TC	518	South African experience regarding alien species: impacts and controls. In: Sandlund, O.T., Schei, P.J., Viken, A. (Eds.)	Huntley	NA	1996	English	Conference proceedings	Pimentel, D., McNair, S., Janecka, J., Wightman, J., Simmonds, C., Oâ€™Connell, C., â€¦ Tsomondo, T. (2001). Economic and environmental threats of alien plant, animal, and microbe invasions. Agriculture, Ecosystems and Environment, 84(1), 1â€“20. https://doi.org/10.1016/S0167-8809(00)00178-X	No	Animalia	Chordata	Mammalia	Carnivora	Felidae	Felis	Felis catus	NA	Feral Cat	Terrestrial	terrestrial	NA	NA	NA	NA	Africa	South Africa	NA	Prince Edward Island	Site	7 years	Period	1989	1996	1989	1996	One-time	1300000	NA	NA	2.03159e+06	4.05206e+06	185714	290228	578866	USD	1996	Publication year
20	838	WoS	1108	Eradication of common mynas Acridotheres tristis from Denis Island, Seychelles	Feare et al	NA	2017	English	Peer-reviewed article	NA	Yes	Animalia	Chordata	Aves	Passeriformes	Sturnidae	Acridotheres	Acridotheres tristis	NA	Common myna	Terrestrial	terrestrial	NA	NA	NA	NA	Africa	Seychelles	NA	Denis Island	Site	5 years (2010-2015)	Period	2010	2015	2010	2015	One-time	784750	NA	NA	784750	1.46597e+06	156950	156950	293193	USD	2017	Publication year
21	878	GS	308	Invasive alien species: The urban dimension	van Ham et al	NA	2013	English	Book	NA	Yes	Animalia	Chordata	Aves	Passeriformes	Corvidae	Corvus	Corvus splendens	NA	House crow	Terrestrial	terrestrial	NA	NA	NA	NA	Africa	Tanzania	NA	Zanzibar	Site	NA	Year	NA	NA	2013	2013	One-time	1500000	NA	NA	2.09559e+06	4.1883e+06	1500000	2.09559e+06	4.1883e+06	EUR	2013	Publication year
22	982	GS	197	Managing Invasive Species : How Much Do We Spend?	SchwÃ¶rer et al	NA	2012	English	Official report	NA	Yes	Diverse/Unspecified	Diverse/Unspecified	Diverse/Unspecified	Diverse/Unspecified	Diverse/Unspecified	Diverse/Unspecified	Diverse/Unspecified	NA	Diverse (animals/pathogens/plants)	Aquatic/Terrestrial	diverse/Unspecified	NA	NA	NA	NA	Africa	South Africa	NA	Cape town	Site	2008	Year	2008	NA	2008	2008	Potentially ongoing	84000	NA	NA	85789.3	215306	84000	85789.3	215306	USD	2013	Publication year
23	983	GS	197	Managing Invasive Species : How Much Do We Spend?	SchwÃ¶rer et al	NA	2012	English	Official report	NA	Yes	Diverse/Unspecified	Diverse/Unspecified	Diverse/Unspecified	Diverse/Unspecified	Diverse/Unspecified	Diverse/Unspecified	Diverse/Unspecified	NA	Diverse (animals/pathogens/plants)	Aquatic/Terrestrial	diverse/Unspecified	NA	NA	NA	NA	Africa	South Africa	NA	Cape town	Site	2014	Year	2014	NA	2014	2014	Potentially ongoing	1900000	NA	NA	1.96728e+06	3.99385e+06	1900000	1.96728e+06	3.99385e+06	USD	2014	Effective
24	993	TC	379	Invasive alien species. In: Africa Environment Outlook	Chenje and Mohammed-Katerere	NA	2002	English	Official report	Mainka, S. A., & Howard, G. W. (2010). Climate change and invasive species: Double jeopardy. Integrative Zoology, 5(2), 102â€“111. https://doi.org/10.1111/j.1749-4877.2010.00193.x ID 9684	No	Diverse/Unspecified	Diverse/Unspecified	Diverse/Unspecified	Diverse/Unspecified	Diverse/Unspecified	Diverse/Unspecified	Diverse/Unspecified	NA	NA	Aquatic/Terrestrial	diverse/Unspecified	NA	NA	NA	NA	Africa	Diverse/Unspecified	NA	NA	Continental	2002	Year	2002	NA	2002	2002	Potentially ongoing	60000000	NA	NA	8.17633e+07	NA	60000000	8.17633e+07	NA	USD	2002	Publication year
25	999	WoS	9426	Economic valuation of the influence of invasive alien species on the economy of the Seychelles islands	Mwebaze et al	NA	2010	English	Peer-reviewed article	NA	Yes	Diverse/Unspecified	Diverse/Unspecified	Diverse/Unspecified	Diverse/Unspecified	Diverse/Unspecified	Diverse/Unspecified	Diverse/Unspecified	NA	NA	Aquatic/Terrestrial	diverse/Unspecified	NA	NA	NA	NA	Africa	Seychelles	NA	NA	Country	2006	Year	2006	NA	2006	2006	Potentially ongoing	65000	NA	NA	73067.5	134934	65000	73067.5	134934	USD	2010	Publication year
26	1107	TC	431	Myiasis: The battle continues against screwworm infestation	Reichard et al	NA	1993	English	Peer-reviewed article	Myers, J. H., Savoie, A., & Van Randen, E. (1998). ERADICATION AND PEST MANAGEMENT. Annu. Rev. Entomol, 43, 471â€“91. (ID15710)	Yes	Animalia	Arthropoda	Insecta	Diptera	Calliphoridae	Cochliomyia	Cochliomyia hominivorax	NA	New World Screwworm	Terrestrial	terrestrial	NA	NA	NA	NA	Africa	Diverse/Unspecified	NA	North Africa	Regional	NA	Year	NA	NA	1993	1993	Potentially ongoing	280000000	NA	NA	4.75109e+08	NA	280000000	4.75109e+08	NA	USD	1993	Publication year
27	1108	TC	584	The New World Screwworm Eradication Programme: North Africa 1988â€“1992	Gillman, Cunningham, and Sidahmed, FAO	NA	1992	English	Official report	Myers, J. H., Savoie, A., & Van Randen, E. (1998). ERADICATION AND PEST MANAGEMENT. Annu. Rev. Entomol, 43, 471â€“91. (ID15710)	Yes	Animalia	Arthropoda	Insecta	Diptera	Calliphoridae	Cochliomyia	Cochliomyia hominivorax	NA	New World Screwworm	Terrestrial	terrestrial	NA	NA	NA	NA	Africa	Libya	NA	NA	Country	NA	Year	NA	NA	1992	1992	One-time	82000000	NA	NA	1.43246e+08	NA	82000000	1.43246e+08	NA	USD	1992	Publication year
28	1144	TC	583	The new world screwworm eradication programme in North Africa. An international effort aims to stop the spread of the health-threatening pest	Vloedt et al	NA	1990	English	Official report	NA	Yes	Animalia	Arthropoda	Insecta	Diptera	Calliphoridae	Cochliomyia	Cochliomyia hominivorax	NA	New World Screwworm	Terrestrial	terrestrial	NA	NA	NA	NA	Africa	Libya	NA	NA	Country	1990	Year	1990	NA	1990	1990	Potentially ongoing	7500000	NA	NA	1.40703e+07	NA	7500000	1.40703e+07	NA	USD	1990	Publication year
29	1145	TC	583	The new world screwworm eradication programme in North Africa. An international effort aims to stop the spread of the health-threatening pest	Vloedt et al	NA	1990	English	Official report	NA	Yes	Animalia	Arthropoda	Insecta	Diptera	Calliphoridae	Cochliomyia	Cochliomyia hominivorax	NA	New World Screwworm	Terrestrial	terrestrial	NA	NA	NA	NA	Africa	Diverse/Unspecified	NA	5 North African countries	Regional	1990	Year	1990	NA	1990	1990	Potentially ongoing	250000000	NA	NA	4.69009e+08	NA	250000000	4.69009e+08	NA	USD	1990	Publication year
30	1146	TC	583	The new world screwworm eradication programme in North Africa. An international effort aims to stop the spread of the health-threatening pest	Vloedt et al	NA	1990	English	Official report	NA	Yes	Animalia	Arthropoda	Insecta	Diptera	Calliphoridae	Cochliomyia	Cochliomyia hominivorax	NA	New World Screwworm	Terrestrial	terrestrial	NA	NA	NA	NA	Africa	Libya	NA	NA	Country	2 years	Period	1990	1992	1990	1992	Potentially ongoing	85000000	NA	NA	1.59463e+08	NA	42500000	7.97315e+07	NA	USD	1990	Publication year
31	1215	TC	585	The North African screwworm eradication programme	Cunningham et al	NA	1992	English	Peer-reviewed article	NA	Yes	Animalia	Arthropoda	Insecta	Diptera	Calliphoridae	Cochliomyia	Cochliomyia hominivorax	NA	New World Screwworm	Terrestrial	terrestrial	NA	NA	NA	NA	Africa	Libya	NA	NA	Country	2 years	Period	1990	1992	1990	1992	One-time	75000000	NA	NA	1.31018e+08	NA	37500000	6.55089e+07	NA	USD	1992	Publication year
32	1233	TC	283	Economics of biological control of cassava mealybug in Africa	Zeddies et al	NA	2001	English	Peer-reviewed article	NA	Yes	Animalia	Arthropoda	Insecta	Hemiptera	Pseudococcidae	Phenacoccus	Phenacoccus manihoti	NA	Cassava mealybug	Terrestrial	terrestrial	NA	NA	NA	NA	Africa	Diverse/Unspecified	NA	27 African countries	Regional	1979-2013	Period	1979	2013	1979	2013	One-time	46900000	NA	NA	7.75585e+07	NA	1340000	2.21596e+06	NA	USD	1994	Effective
33	1234	TC	283	Economics of biological control of cassava mealybug in Africa	Zeddies et al	NA	2001	English	Peer-reviewed article	NA	Yes	Animalia	Arthropoda	Insecta	Hemiptera	Pseudococcidae	Phenacoccus	Phenacoccus manihoti	NA	Cassava mealybug	Terrestrial	terrestrial	NA	NA	NA	NA	Africa	Diverse/Unspecified	NA	27 African countries	Regional	1974-2013	Period	1974	2013	1974	2013	Potentially ongoing	1.19703e+10	9.61231e+09	1.43282e+10	1.97952e+10	NA	2.99256e+08	4.9488e+08	NA	USD	1994	Effective
34	1235	TC	549	The biological control of cassava mealybug in Africa	Norgaard	NA	1988	English	Peer-reviewed article	Zeddies, J., Schaab, R. P., Neuenschwander, P., & Herren, H. R. (2001). Economics of biological control of cassava mealybug in Africa. Agricultural Economics, 24(2), 209â€“219. https://doi.org/10.1016/S0169-5150(00)00064-5	Yes	Animalia	Arthropoda	Insecta	Hemiptera	Pseudococcidae	Phenacoccus	Phenacoccus manihoti	NA	Cassava mealybug	Terrestrial	terrestrial	NA	NA	NA	NA	Africa	Diverse/Unspecified	NA	NA	Continental	1977-2003	Period	1977	2003	1977	2003	One-time	14800000	NA	NA	3.06767e+07	NA	548148	1.13617e+06	NA	USD	1988	Publication year
35	1236	TC	549	The biological control of cassava mealybug in Africa	Norgaard	NA	1988	English	Peer-reviewed article	Zeddies, J., Schaab, R. P., Neuenschwander, P., & Herren, H. R. (2001). Economics of biological control of cassava mealybug in Africa. Agricultural Economics, 24(2), 209â€“219. https://doi.org/10.1016/S0169-5150(00)00064-5	Yes	Animalia	Arthropoda	Insecta	Hemiptera	Pseudococcidae	Phenacoccus	Phenacoccus manihoti	NA	Cassava mealybug	Terrestrial	terrestrial	NA	NA	NA	NA	Africa	Diverse/Unspecified	NA	NA	Continental	1977-2003	Period	1977	2003	1977	2003	Potentially ongoing	2205000000	NA	NA	4.57041e+09	NA	8.16667e+07	1.69274e+08	NA	USD	1988	Publication year
36	1261	TC	529	Status and impact of invasive conifer aphid pests in Africa	Murphy	NA	1996	English	Conference proceedings	In Cock 2003	No	Animalia	Arthropoda	Insecta	Hemiptera	Aphididae	Cinara	Cinara cupressivora	NA	Cypress aphid	Terrestrial	terrestrial	NA	NA	NA	NA	Africa	Diverse/Unspecified	NA	Southern and Eastern Africa	Regional	1991	Year	1991	NA	1991	1991	Potentially ongoing	9100000	NA	NA	2.21873e+07	NA	9100000	2.21873e+07	NA	GBP	1996	Publication year
37	1296	WoS	14202	Socio-economic impact of biological control of mango mealybug in Benin	Bokonon-Ganta et al	NA	2002	English	Peer-reviewed article	NA	Yes	Animalia	Arthropoda	Insecta	Hemiptera	Pseudococcidae	Rastrococcus	Rastrococcus invadens	NA	Mango mealybug	Terrestrial	terrestrial	NA	NA	NA	NA	Africa	Benin	NA	NA	Country	20 years (since 1999)	Period	1999	2009	1999	2009	One-time	36600000	NA	NA	4.98756e+07	1.69503e+08	3660000	4.98756e+06	1.69503e+07	USD	2002	Publication year
38	1341	WoS	714	Returns to research and outreach for integrated pest management of western flower thrips infesting French bean and tomato in Kenya	Mujuka	NA	2017	English	Peer-reviewed article	NA	Yes	Animalia	Arthropoda	Insecta	Thysanoptera	Thripidae	Frankliniella	Frankliniella occidentalis	NA	Western flower thrip	Terrestrial	terrestrial	NA	NA	NA	NA	Africa	Kenya	NA	Loitokitok and Mwea sub-counties	Site	2008-2023	Period	2008	2023	2008	2023	Potentially ongoing	2239319	NA	NA	2.54944e+06	6.2377e+06	139957	159340	389856	USD	2008	Effective
39	1357	WoS	4520	Population dynamics and economic losses caused by Zeuzera pyrina, a cryptic wood-borer moth, in an olive orchard in Egypt	Hegazi et al	NA	2015	English	Peer-reviewed article	NA	Yes	Animalia	Arthropoda	Insecta	Lepidoptera	Cossidae	Zeuzera	Zeuzera pyrina	NA	Leopard moth	Terrestrial	terrestrial	NA	NA	NA	NA	Africa	Egypt	NA	2 plots located between Alexandria and Cairo	Unit (Ha)	2007	Year	2007	NA	2007	2007	Potentially ongoing	1550	1400	1700	1602.99	5085.96	1550	1602.99	5085.96	USD	2015	Publication year
40	1358	WoS	4520	Population dynamics and economic losses caused by Zeuzera pyrina, a cryptic wood-borer moth, in an olive orchard in Egypt	Hegazi et al	NA	2015	English	Peer-reviewed article	NA	Yes	Animalia	Arthropoda	Insecta	Lepidoptera	Cossidae	Zeuzera	Zeuzera pyrina	NA	Leopard moth	Terrestrial	terrestrial	NA	NA	NA	NA	Africa	Egypt	NA	2 plots located between Alexandria and Cairo	Unit (Ha)	2006	Year	2006	NA	2006	2006	Potentially ongoing	2350	1500	3200	2430.34	7710.97	2350	2430.34	7710.97	USD	2015	Publication year
41	1537	GS	310	The economic impact and appropriate management of selected invasive alien species on the African continent. Final Report	Wise et al	NA	2007	English	Official report	NA	Yes	Animalia	Arthropoda	Insecta	Coleoptera	Bostrichidae	Prostephanus	Prostephanus truncatus	NA	Larger grain borer	Terrestrial	terrestrial	NA	NA	NA	NA	Africa	Ghana	NA	NA	Country	NA	Year	NA	NA	2007	2007	Potentially ongoing	536020	507860	564179	651757	1.70568e+06	536020	651757	1.70568e+06	USD	2006	Effective
42	1538	GS	310	The economic impact and appropriate management of selected invasive alien species on the African continent. Final Report	Wise et al	NA	2007	English	Official report	NA	Yes	Animalia	Arthropoda	Insecta	Coleoptera	Bostrichidae	Prostephanus	Prostephanus truncatus	NA	Larger grain borer	Terrestrial	terrestrial	NA	NA	NA	NA	Africa	Benin/Guinea Conakry/Togo	NA	NA	Regional	NA	Year	NA	NA	2007	2007	One-time	7500000	NA	NA	9.11941e+06	NA	7500000	9.11941e+06	NA	USD	2006	Effective
43	1539	GS	310	The economic impact and appropriate management of selected invasive alien species on the African continent. Final Report	Wise et al	NA	2007	English	Official report	NA	Yes	Animalia	Arthropoda	Insecta	Coleoptera	Bostrichidae	Prostephanus	Prostephanus truncatus	NA	Larger grain borer	Terrestrial	terrestrial	NA	NA	NA	NA	Africa	Benin	NA	Mono province	Site	NA	Year	NA	NA	2007	2007	Potentially ongoing	4600000	3200000	6000000	5.59324e+06	1.43781e+07	4600000	5.59324e+06	1.43781e+07	USD	2006	Effective
44	1540	GS	310	The economic impact and appropriate management of selected invasive alien species on the African continent. Final Report	Wise et al	NA	2007	English	Official report	NA	Yes	Animalia	Arthropoda	Insecta	Coleoptera	Bostrichidae	Prostephanus	Prostephanus truncatus	NA	Larger grain borer	Terrestrial	terrestrial	NA	NA	NA	NA	Africa	Ghana	NA	Northern Province	Site	NA	Year	NA	NA	2007	2007	Potentially ongoing	32000	7000	57000	38909.5	101828	32000	38909.5	101828	USD	2006	Effective
45	1541	GS	310	The economic impact and appropriate management of selected invasive alien species on the African continent. Final Report	Wise et al	NA	2007	English	Official report	NA	Yes	Animalia	Arthropoda	Insecta	Coleoptera	Bostrichidae	Prostephanus	Prostephanus truncatus	NA	Larger grain borer	Terrestrial	terrestrial	NA	NA	NA	NA	Africa	Diverse/Unspecified	NA	East and West Africa	Unit (Farmer)	2006	Year	2006	NA	2006	2006	Potentially ongoing	15	NA	NA	18.2388	NA	15	18.2388	NA	USD	2006	Effective
46	1542	GS	310	The economic impact and appropriate management of selected invasive alien species on the African continent. Final Report	Wise et al	NA	2007	English	Official report	NA	Yes	Animalia	Arthropoda	Insecta	Coleoptera	Bostrichidae	Prostephanus	Prostephanus truncatus	NA	Larger grain borer	Terrestrial	terrestrial	NA	NA	NA	NA	Africa	Benin	NA	NA	Unit (Farmer)	2006	Year	2006	NA	2006	2006	Potentially ongoing	151	NA	NA	183.604	471.977	151	183.604	471.977	USD	2006	Effective
47	1543	GS	310	The economic impact and appropriate management of selected invasive alien species on the African continent. Final Report	Wise et al	NA	2007	English	Official report	NA	Yes	Animalia	Arthropoda	Insecta	Coleoptera	Bostrichidae	Prostephanus	Prostephanus truncatus	NA	Larger grain borer	Terrestrial	terrestrial	NA	NA	NA	NA	Africa	Benin	NA	NA	Unit (Farmer)	2006	Year	2006	NA	2006	2006	Potentially ongoing	26	NA	NA	31.614	81.2675	26	31.614	81.2675	USD	2006	Effective
48	1544	GS	310	The economic impact and appropriate management of selected invasive alien species on the African continent. Final Report	Wise et al	NA	2007	English	Official report	NA	Yes	Animalia	Arthropoda	Insecta	Coleoptera	Bostrichidae	Prostephanus	Prostephanus truncatus	NA	Larger grain borer	Terrestrial	terrestrial	NA	NA	NA	NA	Africa	Benin	NA	South-West Benin	Site	2006	Year	2006	NA	2006	2006	Potentially ongoing	218000	NA	NA	265071	681397	218000	265071	681397	USD	2006	Effective
49	1545	GS	310	The economic impact and appropriate management of selected invasive alien species on the African continent. Final Report	Wise et al	NA	2007	English	Official report	NA	Yes	Animalia	Arthropoda	Insecta	Coleoptera	Bostrichidae	Prostephanus	Prostephanus truncatus	NA	Larger grain borer	Terrestrial	terrestrial	NA	NA	NA	NA	Africa	Togo	NA	NA	Country	Over 6 years (Unspecified)	Year	2001	2007	2001	2007	Potentially ongoing	11780	NA	NA	14323.6	41656.5	11780	14323.6	41656.5	USD	2006	Effective
50	1546	GS	310	The economic impact and appropriate management of selected invasive alien species on the African continent. Final Report	Wise et al	NA	2007	English	Official report	NA	Yes	Animalia	Arthropoda	Insecta	Coleoptera	Bostrichidae	Prostephanus	Prostephanus truncatus	NA	Larger grain borer	Terrestrial	terrestrial	NA	NA	NA	NA	Africa	Benin	NA	Southwestern Benin	Country	Over 6 years (Unspecified)	Year	2001	2007	2001	2007	Potentially ongoing	11780	NA	NA	14323.6	41656.5	11780	14323.6	41656.5	USD	2006	Effective
51	1547	GS	310	The economic impact and appropriate management of selected invasive alien species on the African continent. Final Report	Wise et al	NA	2007	English	Official report	NA	Yes	Animalia	Arthropoda	Insecta	Coleoptera	Bostrichidae	Prostephanus	Prostephanus truncatus	NA	Larger grain borer	Terrestrial	terrestrial	NA	NA	NA	NA	Africa	Kenya	NA	Southeastern Kenya	Country	Over 6 years (Unspecified)	Year	2001	2007	2001	2007	Potentially ongoing	11780	NA	NA	14323.6	41656.5	11780	14323.6	41656.5	USD	2006	Effective
52	1548	GS	310	The economic impact and appropriate management of selected invasive alien species on the African continent. Final Report	Wise et al	NA	2007	English	Official report	NA	Yes	Animalia	Arthropoda	Insecta	Coleoptera	Dermestidae	Trogoderma	Trogoderma granarium	NA	Khapra beetle	Terrestrial	terrestrial	NA	NA	NA	NA	Africa	Tanzania	NA	NA	Country	1986-1990	Period	1986	1990	1986	1990	One-time	59000	NA	NA	83984.1	321535	11800	16796.8	64307.1	USD	2000	Effective
53	1653	TC	51	Prospects for extirpating small populations of the wetland invader Melaleuca quinquenervia from South Africa : a case study from the Western Cape region	van Wyk & Jacobs	NA	2015	English	Peer-reviewed article	NA	Yes	Plantae	Tracheophyta	Magnoliopsida	Myrtales	Myrtaceae	Melaleuca	Melaleuca quinquenervia	NA	Broad-leaved paperbark	Terrestrial	semi-aquatic	NA	NA	NA	NA	Africa	South Africa	NA	Wolseley (Western Cape)	Unit (0.28 Ha)	2009-2014	Period	2009	2014	2009	2014	One-time	53196	NA	NA	55014.5	126262	8866	9169.09	21043.7	USD	2015	Publication year
54	1782	WoS	9332	An economic assessment of the contribution of biological control to the management of invasive alien plants and to the protection of ecosystem services in South Africa	Willem J. de Lange, Brian W. van Wilgen	NA	2010	English	Peer-reviewed article	NA	Yes	Plantae	Diverse/Unspecified	Diverse/Unspecified	Diverse/Unspecified	Diverse/Unspecified	Diverse/Unspecified	Diverse/Unspecified	NA	Invasive plants	Aquatic/Terrestrial	diverse/Unspecified	NA	NA	NA	NA	Africa	South Africa	NA	South Africa	Country	NA	Year	NA	NA	2010	2010	Potentially ongoing	6500000000	NA	NA	9.98023e+08	1.1696e+10	6500000000	9.98023e+08	1.1696e+10	ZAR	2010	Publication year
55	1783	WoS	9332	An economic assessment of the contribution of biological control to the management of invasive alien plants and to the protection of ecosystem services in South Africa	Willem J. de Lange, Brian W. van Wilgen	NA	2010	English	Peer-reviewed article	NA	Yes	Plantae	Diverse/Unspecified	Diverse/Unspecified	Diverse/Unspecified	Diverse/Unspecified	Diverse/Unspecified	Diverse/Unspecified	NA	Invasive plants	Aquatic	diverse/Unspecified	NA	NA	NA	NA	Africa	South Africa	NA	South Africa	Country	NA	Year	NA	NA	2010	2010	Potentially ongoing	600000000	NA	NA	9.21252e+07	1.07963e+09	600000000	9.21252e+07	1.07963e+09	ZAR	2010	Publication year
56	1784	WoS	9332	An economic assessment of the contribution of biological control to the management of invasive alien plants and to the protection of ecosystem services in South Africa	Willem J. de Lange, Brian W. van Wilgen	NA	2010	English	Peer-reviewed article	NA	Yes	Plantae	Diverse/Unspecified	Diverse/Unspecified	Diverse/Unspecified	Diverse/Unspecified	Diverse/Unspecified	Diverse/Unspecified	NA	Fire-adapted trees	Terrestrial	terrestrial	NA	NA	NA	NA	Africa	South Africa	NA	South Africa	Country	NA	Year	NA	NA	2010	2010	Potentially ongoing	10320124	NA	NA	1.58457e+06	1.85699e+07	10320124	1.58457e+06	1.85699e+07	ZAR	2010	Publication year
57	1785	WoS	9332	An economic assessment of the contribution of biological control to the management of invasive alien plants and to the protection of ecosystem services in South Africa	Willem J. de Lange, Brian W. van Wilgen	NA	2010	English	Peer-reviewed article	NA	Yes	Plantae	Diverse/Unspecified	Diverse/Unspecified	Diverse/Unspecified	Diverse/Unspecified	Diverse/Unspecified	Diverse/Unspecified	NA	Perennial invasive Australian trees	Terrestrial	terrestrial	NA	NA	NA	NA	Africa	South Africa	NA	South Africa	Country	NA	Year	NA	NA	2010	2010	Potentially ongoing	27941017	NA	NA	4.29012e+06	5.02766e+07	27941017	4.29012e+06	5.02766e+07	ZAR	2010	Publication year
58	1786	WoS	9332	An economic assessment of the contribution of biological control to the management of invasive alien plants and to the protection of ecosystem services in South Africa	Willem J. de Lange, Brian W. van Wilgen	NA	2010	English	Peer-reviewed article	NA	Yes	Plantae	Tracheophyta	Magnoliopsida	Caryophyllales	Cactaceae	Diverse/Unspecified	Diverse/Unspecified	NA	Invasive succulents â€“ cacti	Terrestrial	terrestrial	NA	NA	NA	NA	Africa	South Africa	NA	South Africa	Country	NA	Year	NA	NA	2010	2010	Potentially ongoing	13626030	NA	NA	2.09217e+06	2.45184e+07	13626030	2.09217e+06	2.45184e+07	ZAR	2010	Publication year
59	1787	WoS	9332	An economic assessment of the contribution of biological control to the management of invasive alien plants and to the protection of ecosystem services in South Africa	Willem J. de Lange, Brian W. van Wilgen	NA	2010	English	Peer-reviewed article	NA	Yes	Plantae	Diverse/Unspecified	Diverse/Unspecified	Diverse/Unspecified	Diverse/Unspecified	Diverse/Unspecified	Diverse/Unspecified	NA	Subtropical shrubs	Terrestrial	terrestrial	NA	NA	NA	NA	Africa	South Africa	NA	South Africa	Country	NA	Year	NA	NA	2010	2010	Potentially ongoing	50563394	NA	NA	7.76361e+06	9.09829e+07	50563394	7.76361e+06	9.09829e+07	ZAR	2010	Publication year
60	1805	WoS	13784	The clearing of invasive alien plants in South Africa: a preliminary assessment of costs and progress	C. Marais, B.W. van Wilgen and D. Stevens	NA	2004	English	Peer-reviewed article	NA	Yes	Plantae	Diverse/Unspecified	Diverse/Unspecified	Diverse/Unspecified	Diverse/Unspecified	Diverse/Unspecified	Diverse/Unspecified	NA	IAS plants	Terrestrial	terrestrial	NA	NA	NA	NA	Africa	South Africa	NA	South Africa	Country	1 year (1995-1996)	Year	1996	1996	1996	1996	One-time	25000000	NA	NA	5.02241e+06	6.12224e+07	25000000	5.02241e+06	6.12224e+07	ZAR	2004	Publication year
61	1806	WoS	13784	The clearing of invasive alien plants in South Africa: a preliminary assessment of costs and progress	C. Marais, B.W. van Wilgen and D. Stevens	NA	2004	English	Peer-reviewed article	NA	Yes	Plantae	Diverse/Unspecified	Diverse/Unspecified	Diverse/Unspecified	Diverse/Unspecified	Diverse/Unspecified	Diverse/Unspecified	NA	IAS plants	Terrestrial	terrestrial	NA	NA	NA	NA	Africa	South Africa	NA	South Africa	Country	1 year (2003-2004)	Year	2004	2004	2004	2004	One-time	400000000	NA	NA	8.03586e+07	9.79559e+08	400000000	8.03586e+07	9.79559e+08	ZAR	2004	Publication year
62	1807	WoS	13784	The clearing of invasive alien plants in South Africa: a preliminary assessment of costs and progress	C. Marais, B.W. van Wilgen and D. Stevens	NA	2004	English	Peer-reviewed article	NA	Yes	Plantae	Diverse/Unspecified	Diverse/Unspecified	Diverse/Unspecified	Diverse/Unspecified	Diverse/Unspecified	Diverse/Unspecified	NA	IAS plants	Terrestrial	terrestrial	NA	NA	NA	NA	Africa	South Africa	NA	South Africa	Country	8 years (1995-2003)	Period	1995	2003	1995	2003	One-time	1950000000	NA	NA	3.91748e+08	4.77535e+09	243750000	4.89685e+07	5.96919e+08	ZAR	2004	Publication year
63	1812	WoS	13784	The clearing of invasive alien plants in South Africa: a preliminary assessment of costs and progress	C. Marais, B.W. van Wilgen and D. Stevens	NA	2004	English	Peer-reviewed article	NA	Yes	Plantae	Tracheophyta	Pinopsida	Pinales	Pinaceae	Pinus	Pinus spp.	NA	Pine trees	Terrestrial	terrestrial	NA	NA	NA	NA	Africa	South Africa	NA	South Africa	Country	1 year (2002-2003)	Year	2002	2003	2003	2003	Potentially ongoing	9320000	NA	NA	1.87236e+06	2.28237e+07	9320000	1.87236e+06	2.28237e+07	ZAR	2004	Publication year
64	1814	WoS	13784	The clearing of invasive alien plants in South Africa: a preliminary assessment of costs and progress	C. Marais, B.W. van Wilgen and D. Stevens	NA	2004	English	Peer-reviewed article	NA	Yes	Plantae	Tracheophyta	Magnoliopsida	Solanales	Solanaceae	Solanum	Solanum mauritianum	NA	Bugweed	Terrestrial	terrestrial	NA	NA	NA	NA	Africa	South Africa	NA	South Africa	Country	1 year (2002-2003)	Year	2002	2003	2003	2003	Potentially ongoing	7320000	NA	NA	1.47056e+06	1.79259e+07	7320000	1.47056e+06	1.79259e+07	ZAR	2004	Publication year
65	1817	WoS	13784	The clearing of invasive alien plants in South Africa: a preliminary assessment of costs and progress	C. Marais, B.W. van Wilgen and D. Stevens	NA	2004	English	Peer-reviewed article	NA	Yes	Plantae	Tracheophyta	Magnoliopsida	Proteales	Proteaceae	Hakea	Hakea spp.	NA	Hakeas	Terrestrial	terrestrial	NA	NA	NA	NA	Africa	South Africa	NA	South Africa	Country	1 year (2002-2003)	Year	2002	2003	2003	2003	Potentially ongoing	1870000	NA	NA	375677	4.57944e+06	1870000	375677	4.57944e+06	ZAR	2004	Publication year
66	1820	TC	161	A.C.A.C.I.A.	J.A. Stubbings	NA	1977	English	Conference paper	NA	Yes	Plantae	Tracheophyta	Magnoliopsida	Fabales	Fabaceae	Acacia	Acacia mearnsii	NA	Black wattle	Terrestrial	terrestrial	NA	NA	NA	NA	Africa	South Africa	NA	South Africa	Country	NA	Year	NA	NA	1977	1977	Potentially ongoing	500000	NA	NA	2.32548e+06	4.53745e+06	500000	2.32548e+06	4.53745e+06	ZAR	1977	Publication year
67	1821	TC	161	A.C.A.C.I.A.	J.A. Stubbings	NA	1977	English	Conference paper	NA	Yes	Plantae	Tracheophyta	Magnoliopsida	Fabales	Fabaceae	Acacia	Acacia mearnsii	NA	Black wattle	Terrestrial	terrestrial	NA	NA	NA	NA	Africa	South Africa	NA	South Africa	Country	NA	Year	NA	NA	1977	1977	One-time	2880000	NA	NA	1.33948e+07	2.61357e+07	2880000	1.33948e+07	2.61357e+07	ZAR	1977	Publication year
68	1823	WoS	7477	Evaluating the cost-effectiveness of invasive alien plant clearing: A case study from South Africa	Matthew M. McConnachie, Richard M. Cowling, Brian W. van Wilgen, Dominic A. McConnachie	NA	2012	English	Peer-reviewed article	NA	Yes	Plantae	Diverse/Unspecified	Diverse/Unspecified	Diverse/Unspecified	Diverse/Unspecified	Diverse/Unspecified	Diverse/Unspecified	NA	IAS plants	Terrestrial	terrestrial	NA	NA	NA	NA	Africa	South Africa	NA	Kouga river catchment within the Eastern Cape Province, South Africa	Site	6 years (2002-2008)	Period	2002	2008	2002	2008	One-time	8040000	NA	NA	1.04552e+06	1.42793e+07	1340000	174253	2.37989e+06	ZAR	2012	Publication year
69	1824	WoS	7477	Evaluating the cost-effectiveness of invasive alien plant clearing: A case study from South Africa	Matthew M. McConnachie, Richard M. Cowling, Brian W. van Wilgen, Dominic A. McConnachie	NA	2012	English	Peer-reviewed article	NA	Yes	Plantae	Diverse/Unspecified	Diverse/Unspecified	Diverse/Unspecified	Diverse/Unspecified	Diverse/Unspecified	Diverse/Unspecified	NA	IAS plants	Terrestrial	terrestrial	NA	NA	NA	NA	Africa	South Africa	NA	Krom river catchment within the Eastern Cape Province, South Africa	Site	6 years (2002-2008)	Period	2002	2008	2002	2008	One-time	8460000	NA	NA	1.10014e+06	1.50253e+07	1410000	183356	2.50421e+06	ZAR	2012	Publication year
70	1825	TC	382	Invasive species and the Working for Water programme in South Africa (in: Identification of risks and management of invasive alien species using the IPPC framework)	Identification of risks and management of invasive alien species using the IPPC framework	NA	2005	English	Workshop proceedings	NA	Yes	Plantae	Diverse/Unspecified	Diverse/Unspecified	Diverse/Unspecified	Diverse/Unspecified	Diverse/Unspecified	Diverse/Unspecified	NA	IAS plants	Terrestrial	terrestrial	NA	NA	NA	NA	Africa	South Africa	NA	South Africa	Country	20 years	Year	2005	2025	2005	2025	Potentially ongoing	600000000	NA	NA	1.18423e+08	1.36944e+09	600000000	1.18423e+08	1.36944e+09	ZAR	2005	Publication year
71	1844	WoS	14369	Invasive alien trees and water resources in South Africa: case studies of the costs and benefits of management.	Le Maitre, D. C., van Wilgen, B. W., Gelderblom, C. M., Bailey, C., Chapman, R. A., & Nel, J. A.	NA	2002	English	Peer-reviewed article	NA	Yes	Plantae	Diverse/Unspecified	Diverse/Unspecified	Diverse/Unspecified	Diverse/Unspecified	Diverse/Unspecified	Diverse/Unspecified	NA	IAS plants	Terrestrial	terrestrial	NA	NA	NA	NA	Africa	South Africa	NA	South Africa	Country	20 years	Year	2002	2022	2002	2022	Potentially ongoing	92000000	NA	NA	1.2537e+08	4.15149e+08	92000000	1.2537e+08	4.15149e+08	USD	2002	Publication year
72	1845	WoS	14369	Invasive alien trees and water resources in South Africa: case studies of the costs and benefits of management.	Le Maitre, D. C., van Wilgen, B. W., Gelderblom, C. M., Bailey, C., Chapman, R. A., & Nel, J. A.	NA	2002	English	Peer-reviewed article	NA	Yes	Plantae	Diverse/Unspecified	Diverse/Unspecified	Diverse/Unspecified	Diverse/Unspecified	Diverse/Unspecified	Diverse/Unspecified	NA	IAS plants	Terrestrial	terrestrial	NA	NA	NA	NA	Africa	South Africa	NA	Sonderend	Site	NA	Year	NA	NA	2002	2002	One-time	13200000	NA	NA	1.79879e+07	5.95649e+07	13200000	1.79879e+07	5.95649e+07	USD	2002	Publication year
73	1846	WoS	14369	Invasive alien trees and water resources in South Africa: case studies of the costs and benefits of management.	Le Maitre, D. C., van Wilgen, B. W., Gelderblom, C. M., Bailey, C., Chapman, R. A., & Nel, J. A.	NA	2002	English	Peer-reviewed article	NA	Yes	Plantae	Diverse/Unspecified	Diverse/Unspecified	Diverse/Unspecified	Diverse/Unspecified	Diverse/Unspecified	Diverse/Unspecified	NA	IAS plants	Terrestrial	terrestrial	NA	NA	NA	NA	Africa	South Africa	NA	Keurbooms	Site	NA	Year	NA	NA	2002	2002	One-time	9900000	NA	NA	1.34909e+07	4.46737e+07	9900000	1.34909e+07	4.46737e+07	USD	2002	Publication year
74	1847	WoS	14369	Invasive alien trees and water resources in South Africa: case studies of the costs and benefits of management.	Le Maitre, D. C., van Wilgen, B. W., Gelderblom, C. M., Bailey, C., Chapman, R. A., & Nel, J. A.	NA	2002	English	Peer-reviewed article	NA	Yes	Plantae	Diverse/Unspecified	Diverse/Unspecified	Diverse/Unspecified	Diverse/Unspecified	Diverse/Unspecified	Diverse/Unspecified	NA	IAS plants	Terrestrial	terrestrial	NA	NA	NA	NA	Africa	South Africa	NA	Upper Wilge	Site	NA	Year	NA	NA	2002	2002	One-time	4100000	NA	NA	5.58716e+06	1.85012e+07	4100000	5.58716e+06	1.85012e+07	USD	2002	Publication year
75	1848	WoS	14369	Invasive alien trees and water resources in South Africa: case studies of the costs and benefits of management.	Le Maitre, D. C., van Wilgen, B. W., Gelderblom, C. M., Bailey, C., Chapman, R. A., & Nel, J. A.	NA	2002	English	Peer-reviewed article	NA	Yes	Plantae	Diverse/Unspecified	Diverse/Unspecified	Diverse/Unspecified	Diverse/Unspecified	Diverse/Unspecified	Diverse/Unspecified	NA	IAS plants	Terrestrial	terrestrial	NA	NA	NA	NA	Africa	South Africa	NA	Sabie-Sand	Site	NA	Year	NA	NA	2002	2002	One-time	6600000	NA	NA	8.99396e+06	2.97824e+07	6600000	8.99396e+06	2.97824e+07	USD	2002	Publication year
76	1849	WoS	14369	Invasive alien trees and water resources in South Africa: case studies of the costs and benefits of management.	Le Maitre, D. C., van Wilgen, B. W., Gelderblom, C. M., Bailey, C., Chapman, R. A., & Nel, J. A.	NA	2002	English	Peer-reviewed article	NA	Yes	Plantae	Diverse/Unspecified	Diverse/Unspecified	Diverse/Unspecified	Diverse/Unspecified	Diverse/Unspecified	Diverse/Unspecified	NA	IAS plants	Terrestrial	terrestrial	NA	NA	NA	NA	Africa	South Africa	NA	Sonderend	Site	NA	Year	NA	NA	2002	2002	One-time	86500000	NA	NA	1.17875e+08	3.90331e+08	86500000	1.17875e+08	3.90331e+08	USD	2002	Publication year
77	1850	WoS	14369	Invasive alien trees and water resources in South Africa: case studies of the costs and benefits of management.	Le Maitre, D. C., van Wilgen, B. W., Gelderblom, C. M., Bailey, C., Chapman, R. A., & Nel, J. A.	NA	2002	English	Peer-reviewed article	NA	Yes	Plantae	Diverse/Unspecified	Diverse/Unspecified	Diverse/Unspecified	Diverse/Unspecified	Diverse/Unspecified	Diverse/Unspecified	NA	IAS plants	Terrestrial	terrestrial	NA	NA	NA	NA	Africa	South Africa	NA	Keurbooms	Site	NA	Year	NA	NA	2002	2002	One-time	20500000	NA	NA	2.79358e+07	9.25061e+07	20500000	2.79358e+07	9.25061e+07	USD	2002	Publication year
78	1851	WoS	14369	Invasive alien trees and water resources in South Africa: case studies of the costs and benefits of management.	Le Maitre, D. C., van Wilgen, B. W., Gelderblom, C. M., Bailey, C., Chapman, R. A., & Nel, J. A.	NA	2002	English	Peer-reviewed article	NA	Yes	Plantae	Diverse/Unspecified	Diverse/Unspecified	Diverse/Unspecified	Diverse/Unspecified	Diverse/Unspecified	Diverse/Unspecified	NA	IAS plants	Terrestrial	terrestrial	NA	NA	NA	NA	Africa	South Africa	NA	Upper Wilge	Site	NA	Year	NA	NA	2002	2002	One-time	278000000	NA	NA	3.78837e+08	1.25447e+09	278000000	3.78837e+08	1.25447e+09	USD	2002	Publication year
79	1852	WoS	14369	Invasive alien trees and water resources in South Africa: case studies of the costs and benefits of management.	Le Maitre, D. C., van Wilgen, B. W., Gelderblom, C. M., Bailey, C., Chapman, R. A., & Nel, J. A.	NA	2002	English	Peer-reviewed article	NA	Yes	Plantae	Diverse/Unspecified	Diverse/Unspecified	Diverse/Unspecified	Diverse/Unspecified	Diverse/Unspecified	Diverse/Unspecified	NA	IAS plants	Terrestrial	terrestrial	NA	NA	NA	NA	Africa	South Africa	NA	Sabie-Sand	Site	NA	Year	NA	NA	2002	2002	One-time	11100000	NA	NA	1.51262e+07	5.00887e+07	11100000	1.51262e+07	5.00887e+07	USD	2002	Publication year
80	1853	WoS	14369	Invasive alien trees and water resources in South Africa: case studies of the costs and benefits of management.	Le Maitre, D. C., van Wilgen, B. W., Gelderblom, C. M., Bailey, C., Chapman, R. A., & Nel, J. A.	NA	2002	English	Peer-reviewed article	NA	Yes	Plantae	Diverse/Unspecified	Diverse/Unspecified	Diverse/Unspecified	Diverse/Unspecified	Diverse/Unspecified	Diverse/Unspecified	NA	IAS plants	Terrestrial	terrestrial	NA	NA	NA	NA	Africa	South Africa	NA	Sonderend	Site	NA	Year	NA	NA	2002	2002	Potentially ongoing	550000	NA	NA	749497	2.48187e+06	550000	749497	2.48187e+06	USD	2002	Publication year
81	1854	WoS	14369	Invasive alien trees and water resources in South Africa: case studies of the costs and benefits of management.	Le Maitre, D. C., van Wilgen, B. W., Gelderblom, C. M., Bailey, C., Chapman, R. A., & Nel, J. A.	NA	2002	English	Peer-reviewed article	NA	Yes	Plantae	Diverse/Unspecified	Diverse/Unspecified	Diverse/Unspecified	Diverse/Unspecified	Diverse/Unspecified	Diverse/Unspecified	NA	IAS plants	Terrestrial	terrestrial	NA	NA	NA	NA	Africa	South Africa	NA	Keurbooms	Site	NA	Year	NA	NA	2002	2002	Potentially ongoing	1090000	NA	NA	1.48537e+06	4.91862e+06	1090000	1.48537e+06	4.91862e+06	USD	2002	Publication year
82	1855	WoS	14369	Invasive alien trees and water resources in South Africa: case studies of the costs and benefits of management.	Le Maitre, D. C., van Wilgen, B. W., Gelderblom, C. M., Bailey, C., Chapman, R. A., & Nel, J. A.	NA	2002	English	Peer-reviewed article	NA	Yes	Plantae	Diverse/Unspecified	Diverse/Unspecified	Diverse/Unspecified	Diverse/Unspecified	Diverse/Unspecified	Diverse/Unspecified	NA	IAS plants	Terrestrial	terrestrial	NA	NA	NA	NA	Africa	South Africa	NA	Sabie-Sand	Site	NA	Year	NA	NA	2002	2002	Potentially ongoing	53000000	NA	NA	7.22243e+07	2.39162e+08	53000000	7.22243e+07	2.39162e+08	USD	2002	Publication year
83	1869	TC	600	The working for water programme: evolution of a payments for ecosystem services mechanism that addresses both poverty and ecosystem service delivery in South Africa	J.K. Turpie , C. Marais , J.N. Blignaut	NA	2008	English	Peer-reviewed article	NA	Yes	Plantae	Diverse/Unspecified	Diverse/Unspecified	Diverse/Unspecified	Diverse/Unspecified	Diverse/Unspecified	Diverse/Unspecified	NA	IAS plants	Terrestrial	terrestrial	NA	NA	NA	NA	Africa	South Africa	NA	South Africa	Country	1 year (1995-1996)	Year	1996	1996	1996	1996	One-time	27046000	NA	NA	3.72724e+06	6.2347e+07	27046000	3.72724e+06	6.2347e+07	ZAR	2008	Publication year
84	1870	TC	600	The working for water programme: evolution of a payments for ecosystem services mechanism that addresses both poverty and ecosystem service delivery in South Africa	J.K. Turpie , C. Marais , J.N. Blignaut	NA	2008	English	Peer-reviewed article	NA	Yes	Plantae	Diverse/Unspecified	Diverse/Unspecified	Diverse/Unspecified	Diverse/Unspecified	Diverse/Unspecified	Diverse/Unspecified	NA	IAS plants	Terrestrial	terrestrial	NA	NA	NA	NA	Africa	South Africa	NA	South Africa	Country	1 year (1996-1997)	Year	1997	1997	1997	1997	One-time	86668000	NA	NA	1.19438e+07	1.99789e+08	86668000	1.19438e+07	1.99789e+08	ZAR	2008	Publication year
85	1871	TC	600	The working for water programme: evolution of a payments for ecosystem services mechanism that addresses both poverty and ecosystem service delivery in South Africa	J.K. Turpie , C. Marais , J.N. Blignaut	NA	2008	English	Peer-reviewed article	NA	Yes	Plantae	Diverse/Unspecified	Diverse/Unspecified	Diverse/Unspecified	Diverse/Unspecified	Diverse/Unspecified	Diverse/Unspecified	NA	IAS plants	Terrestrial	terrestrial	NA	NA	NA	NA	Africa	South Africa	NA	South Africa	Country	1 year (1997-1998)	Year	1998	1998	1998	1998	One-time	251436000	NA	NA	3.46507e+07	5.79616e+08	251436000	3.46507e+07	5.79616e+08	ZAR	2008	Publication year
86	1872	TC	600	The working for water programme: evolution of a payments for ecosystem services mechanism that addresses both poverty and ecosystem service delivery in South Africa	J.K. Turpie , C. Marais , J.N. Blignaut	NA	2008	English	Peer-reviewed article	NA	Yes	Plantae	Diverse/Unspecified	Diverse/Unspecified	Diverse/Unspecified	Diverse/Unspecified	Diverse/Unspecified	Diverse/Unspecified	NA	IAS plants	Terrestrial	terrestrial	NA	NA	NA	NA	Africa	South Africa	NA	South Africa	Country	1 year (1998-1999)	Year	1999	1999	1999	1999	One-time	260534000	NA	NA	3.59045e+07	6.00589e+08	260534000	3.59045e+07	6.00589e+08	ZAR	2008	Publication year
87	1873	TC	600	The working for water programme: evolution of a payments for ecosystem services mechanism that addresses both poverty and ecosystem service delivery in South Africa	J.K. Turpie , C. Marais , J.N. Blignaut	NA	2008	English	Peer-reviewed article	NA	Yes	Plantae	Diverse/Unspecified	Diverse/Unspecified	Diverse/Unspecified	Diverse/Unspecified	Diverse/Unspecified	Diverse/Unspecified	NA	IAS plants	Terrestrial	terrestrial	NA	NA	NA	NA	Africa	South Africa	NA	South Africa	Country	1 year (1999-2000)	Year	2000	2000	2000	2000	One-time	241762000	NA	NA	3.33175e+07	5.57315e+08	241762000	3.33175e+07	5.57315e+08	ZAR	2008	Publication year
88	1874	TC	600	The working for water programme: evolution of a payments for ecosystem services mechanism that addresses both poverty and ecosystem service delivery in South Africa	J.K. Turpie , C. Marais , J.N. Blignaut	NA	2008	English	Peer-reviewed article	NA	Yes	Plantae	Diverse/Unspecified	Diverse/Unspecified	Diverse/Unspecified	Diverse/Unspecified	Diverse/Unspecified	Diverse/Unspecified	NA	IAS plants	Terrestrial	terrestrial	NA	NA	NA	NA	Africa	South Africa	NA	South Africa	Country	1 year (2000-2001)	Year	2001	2001	2001	2001	One-time	328520000	NA	NA	4.52737e+07	7.57312e+08	328520000	4.52737e+07	7.57312e+08	ZAR	2008	Publication year
89	1875	TC	600	The working for water programme: evolution of a payments for ecosystem services mechanism that addresses both poverty and ecosystem service delivery in South Africa	J.K. Turpie , C. Marais , J.N. Blignaut	NA	2008	English	Peer-reviewed article	NA	Yes	Plantae	Diverse/Unspecified	Diverse/Unspecified	Diverse/Unspecified	Diverse/Unspecified	Diverse/Unspecified	Diverse/Unspecified	NA	IAS plants	Terrestrial	terrestrial	NA	NA	NA	NA	Africa	South Africa	NA	South Africa	Country	1 year (2001-2002)	Year	2002	2002	2002	2002	One-time	397523000	NA	NA	5.47831e+07	9.16379e+08	397523000	5.47831e+07	9.16379e+08	ZAR	2008	Publication year
90	1876	TC	600	The working for water programme: evolution of a payments for ecosystem services mechanism that addresses both poverty and ecosystem service delivery in South Africa	J.K. Turpie , C. Marais , J.N. Blignaut	NA	2008	English	Peer-reviewed article	NA	Yes	Plantae	Diverse/Unspecified	Diverse/Unspecified	Diverse/Unspecified	Diverse/Unspecified	Diverse/Unspecified	Diverse/Unspecified	NA	IAS plants	Terrestrial	terrestrial	NA	NA	NA	NA	Africa	South Africa	NA	South Africa	Country	1 year (2002-2003)	Year	2003	2003	2003	2003	One-time	416000000	NA	NA	5.73295e+07	9.58972e+08	416000000	5.73295e+07	9.58972e+08	ZAR	2008	Publication year
91	1877	TC	600	The working for water programme: evolution of a payments for ecosystem services mechanism that addresses both poverty and ecosystem service delivery in South Africa	J.K. Turpie , C. Marais , J.N. Blignaut	NA	2008	English	Peer-reviewed article	NA	Yes	Plantae	Diverse/Unspecified	Diverse/Unspecified	Diverse/Unspecified	Diverse/Unspecified	Diverse/Unspecified	Diverse/Unspecified	NA	IAS plants	Terrestrial	terrestrial	NA	NA	NA	NA	Africa	South Africa	NA	South Africa	Country	1 year (2003-2004)	Year	2004	2004	2004	2004	One-time	415624000	NA	NA	5.72777e+07	9.58106e+08	415624000	5.72777e+07	9.58106e+08	ZAR	2008	Publication year
92	1878	TC	600	The working for water programme: evolution of a payments for ecosystem services mechanism that addresses both poverty and ecosystem service delivery in South Africa	J.K. Turpie , C. Marais , J.N. Blignaut	NA	2008	English	Peer-reviewed article	NA	Yes	Plantae	Diverse/Unspecified	Diverse/Unspecified	Diverse/Unspecified	Diverse/Unspecified	Diverse/Unspecified	Diverse/Unspecified	NA	IAS plants	Terrestrial	terrestrial	NA	NA	NA	NA	Africa	South Africa	NA	South Africa	Country	1 year (2004-2005)	Year	2005	2005	2005	2005	One-time	416120000	NA	NA	5.7346e+07	9.59249e+08	416120000	5.7346e+07	9.59249e+08	ZAR	2008	Publication year
93	1879	TC	600	The working for water programme: evolution of a payments for ecosystem services mechanism that addresses both poverty and ecosystem service delivery in South Africa	J.K. Turpie , C. Marais , J.N. Blignaut	NA	2008	English	Peer-reviewed article	NA	Yes	Plantae	Diverse/Unspecified	Diverse/Unspecified	Diverse/Unspecified	Diverse/Unspecified	Diverse/Unspecified	Diverse/Unspecified	NA	IAS plants	Terrestrial	terrestrial	NA	NA	NA	NA	Africa	South Africa	NA	South Africa	Country	1 year (2005-2006)	Year	2006	2006	2006	2006	One-time	402676000	NA	NA	5.54933e+07	9.28258e+08	402676000	5.54933e+07	9.28258e+08	ZAR	2008	Publication year
95	1903	WoS	8547	National-scale strategic approaches for managing introduced plants: insights from Australian acacias in South Africa	Brian W. van Wilgen, Colin Dyer, John H. Hoffmann, Philip Ivey, David C. Le Maitre, Joslin L. Moore, David M. Richardson, Mathieu Rouget, Andrew Wannenburgh and John R. U. Wilson	Aim: A range of approaches and philosophies underpin national-level strategies for managing invasive alien plants. This study presents a strategy for the management of taxa that both have value and do harm. Location: South Africa. Methods: Insights were derived from examining Australian Acacia species in South Africa (c. 70 species introduced, mostly > 150 years ago; some have commercial and othe…	2011	English	Peer-reviewed article	NA	Yes	Plantae	Tracheophyta	Magnoliopsida	Fabales	Fabaceae	Acacia	Acacia spp.	NA	Acacia	Terrestrial	terrestrial	N	NA	NA	N	Africa	South Africa	NA	South Africa	Country	10 years (between 2000 and 2010)	Period	2000	2010	2000	2010	One-time	880000000	NA	NA	1.35117e+08	1.58346e+09	88000000	1.35117e+07	1.58346e+08	ZAR	2010	Effective
96	1905	WoS	7870	An assessment of the effectiveness of a large, national-scale invasive alien plant control strategy in South Africa	van Wilgen, B. W., Forsyth, G. G., Le Maitre, D. C., Wannenburgh, A., KotzÃ©, J. D., van den Berg, E., & Henderson, L.	NA	2012	English	Peer-reviewed article	NA	Yes	Plantae	Tracheophyta	Magnoliopsida	Fabales	Fabaceae	Acacia	Acacia cyclops	NA	Rooikrans	Terrestrial	terrestrial	NA	NA	NA	NA	Africa	South Africa	NA	South Africa	Country	1995-2008	Period	1995	2008	1995	2008	Potentially ongoing	5.38571e+07	NA	NA	7.99305e+06	1.61891e+07	4.14286e+06	570932	1.15636e+06	ZAR	2008	Effective
97	1906	WoS	7870	An assessment of the effectiveness of a large, national-scale invasive alien plant control strategy in South Africa	van Wilgen, B. W., Forsyth, G. G., Le Maitre, D. C., Wannenburgh, A., KotzÃ©, J. D., van den Berg, E., & Henderson, L.	NA	2012	English	Peer-reviewed article	NA	Yes	Plantae	Tracheophyta	Magnoliopsida	Fabales	Fabaceae	Acacia	Acacia dealbata	NA	Silver wattle	Terrestrial	terrestrial	NA	NA	NA	NA	Africa	South Africa	NA	South Africa	Country	1995-2008	Period	1995	2008	1995	2008	Potentially ongoing	7.36357e+07	NA	NA	1.09284e+07	2.21343e+07	5.66429e+06	780602	1.58102e+06	ZAR	2008	Effective
98	1907	WoS	7870	An assessment of the effectiveness of a large, national-scale invasive alien plant control strategy in South Africa	van Wilgen, B. W., Forsyth, G. G., Le Maitre, D. C., Wannenburgh, A., KotzÃ©, J. D., van den Berg, E., & Henderson, L.	NA	2012	English	Peer-reviewed article	NA	Yes	Plantae	Tracheophyta	Magnoliopsida	Fabales	Fabaceae	Acacia	Acacia mearnsii	NA	Black wattle	Terrestrial	terrestrial	NA	NA	NA	NA	Africa	South Africa	NA	South Africa	Country	1995-2008	Period	1995	2008	1995	2008	Potentially ongoing	5.21764e+08	NA	NA	7.74361e+07	1.56838e+08	4.01357e+07	5.53115e+06	1.12027e+07	ZAR	2008	Effective
99	1908	WoS	7870	An assessment of the effectiveness of a large, national-scale invasive alien plant control strategy in South Africa	van Wilgen, B. W., Forsyth, G. G., Le Maitre, D. C., Wannenburgh, A., KotzÃ©, J. D., van den Berg, E., & Henderson, L.	NA	2012	English	Peer-reviewed article	NA	Yes	Plantae	Tracheophyta	Magnoliopsida	Fabales	Fabaceae	Acacia	Acacia melanoxylon	NA	Blackwood	Terrestrial	terrestrial	NA	NA	NA	NA	Africa	South Africa	NA	South Africa	Country	1995-2008	Period	1995	2008	1995	2008	Potentially ongoing	26000000	NA	NA	3.85871e+06	7.8154e+06	2000000	275622	558243	ZAR	2008	Effective
100	1909	WoS	7870	An assessment of the effectiveness of a large, national-scale invasive alien plant control strategy in South Africa	van Wilgen, B. W., Forsyth, G. G., Le Maitre, D. C., Wannenburgh, A., KotzÃ©, J. D., van den Berg, E., & Henderson, L.	NA	2012	English	Peer-reviewed article	NA	Yes	Plantae	Tracheophyta	Magnoliopsida	Fabales	Fabaceae	Acacia	Acacia saligna	NA	Port Jackson Willow	Terrestrial	terrestrial	NA	NA	NA	NA	Africa	South Africa	NA	South Africa	Country	1995-2008	Period	1995	2008	1995	2008	Potentially ongoing	8.20857e+07	NA	NA	1.21825e+07	2.46743e+07	6.31429e+06	870179	1.76245e+06	ZAR	2008	Effective
101	1910	WoS	7870	An assessment of the effectiveness of a large, national-scale invasive alien plant control strategy in South Africa	van Wilgen, B. W., Forsyth, G. G., Le Maitre, D. C., Wannenburgh, A., KotzÃ©, J. D., van den Berg, E., & Henderson, L.	NA	2012	English	Peer-reviewed article	NA	Yes	Plantae	Tracheophyta	Liliopsida	Poales	Poaceae	Arundo	Arundo donax	NA	Robust reed	Terrestrial	terrestrial	NA	NA	NA	NA	Africa	South Africa	NA	South Africa	Country	1995-2008	Period	1995	2008	1995	2008	Potentially ongoing	7.61429e+06	NA	NA	1.13005e+06	2.2888e+06	585714	80718	163486	ZAR	2008	Effective
102	1911	WoS	7870	An assessment of the effectiveness of a large, national-scale invasive alien plant control strategy in South Africa	van Wilgen, B. W., Forsyth, G. G., Le Maitre, D. C., Wannenburgh, A., KotzÃ©, J. D., van den Berg, E., & Henderson, L.	NA	2012	English	Peer-reviewed article	NA	Yes	Plantae	Tracheophyta	Magnoliopsida	Fabales	Fabaceae	Caesalpinia	Caesalpinia decapetala	NA	Mauritius thorn	Terrestrial	terrestrial	NA	NA	NA	NA	Africa	South Africa	NA	South Africa	Country	1995-2008	Period	1995	2008	1995	2008	Potentially ongoing	3.08286e+07	NA	NA	4.57533e+06	9.26684e+06	2.37143e+06	326809	661917	ZAR	2008	Effective
103	1912	WoS	7870	An assessment of the effectiveness of a large, national-scale invasive alien plant control strategy in South Africa	van Wilgen, B. W., Forsyth, G. G., Le Maitre, D. C., Wannenburgh, A., KotzÃ©, J. D., van den Berg, E., & Henderson, L.	NA	2012	English	Peer-reviewed article	NA	Yes	Plantae	Tracheophyta	Magnoliopsida	Caryophyllales	Cactaceae	Cereus	Cereus jamacaru	NA	Queen of the night	Terrestrial	terrestrial	NA	NA	NA	NA	Africa	South Africa	NA	South Africa	Country	1995-2008	Period	1995	2008	1995	2008	Potentially ongoing	5.33929e+07	NA	NA	7.92415e+06	1.60495e+07	4.10714e+06	566010	1.14639e+06	ZAR	2008	Effective
104	1913	WoS	7870	An assessment of the effectiveness of a large, national-scale invasive alien plant control strategy in South Africa	van Wilgen, B. W., Forsyth, G. G., Le Maitre, D. C., Wannenburgh, A., KotzÃ©, J. D., van den Berg, E., & Henderson, L.	NA	2012	English	Peer-reviewed article	NA	Yes	Plantae	Tracheophyta	Magnoliopsida	Asterales	Asteraceae	Chromolaena	Chromolaena odorata	NA	Triffid weed	Terrestrial	terrestrial	NA	NA	NA	NA	Africa	South Africa	NA	South Africa	Country	1995-2008	Period	1995	2008	1995	2008	Potentially ongoing	1.59529e+08	NA	NA	2.3676e+07	4.79531e+07	1.22714e+07	1.69114e+06	3.42522e+06	ZAR	2008	Effective
105	1914	WoS	7870	An assessment of the effectiveness of a large, national-scale invasive alien plant control strategy in South Africa	van Wilgen, B. W., Forsyth, G. G., Le Maitre, D. C., Wannenburgh, A., KotzÃ©, J. D., van den Berg, E., & Henderson, L.	NA	2012	English	Peer-reviewed article	NA	Yes	Plantae	Tracheophyta	Magnoliopsida	Myrtales	Myrtaceae	Eucalyptus	Eucalyptus spp.	NA	Gum trees	Terrestrial	diverse/Unspecified	NA	NA	NA	NA	Africa	South Africa	NA	South Africa	Country	1995-2008	Period	1995	2008	1995	2008	Potentially ongoing	2.20071e+08	NA	NA	3.26613e+07	6.61518e+07	1.69286e+07	2.33295e+06	4.72513e+06	ZAR	2008	Effective
106	1915	WoS	7870	An assessment of the effectiveness of a large, national-scale invasive alien plant control strategy in South Africa	van Wilgen, B. W., Forsyth, G. G., Le Maitre, D. C., Wannenburgh, A., KotzÃ©, J. D., van den Berg, E., & Henderson, L.	NA	2012	English	Peer-reviewed article	NA	Yes	Plantae	Tracheophyta	Magnoliopsida	Proteales	Proteaceae	Hakea	Hakea sericea	NA	Silky hakea	Terrestrial	terrestrial	NA	NA	NA	NA	Africa	South Africa	NA	South Africa	Country	1995-2008	Period	1995	2008	1995	2008	Potentially ongoing	64350000	NA	NA	9.55032e+06	1.93431e+07	4950000	682166	1.38165e+06	ZAR	2008	Effective
107	1916	WoS	7870	An assessment of the effectiveness of a large, national-scale invasive alien plant control strategy in South Africa	van Wilgen, B. W., Forsyth, G. G., Le Maitre, D. C., Wannenburgh, A., KotzÃ©, J. D., van den Berg, E., & Henderson, L.	NA	2012	English	Peer-reviewed article	NA	Yes	Plantae	Tracheophyta	Magnoliopsida	Lamiales	Verbenaceae	Lantana	Lantana camara	NA	Lantana	Terrestrial	terrestrial	NA	NA	NA	NA	Africa	South Africa	NA	South Africa	Country	1995-2008	Period	1995	2008	1995	2008	Potentially ongoing	167700000	NA	NA	2.48887e+07	5.04094e+07	12900000	1.77776e+06	3.60067e+06	ZAR	2008	Effective
108	1917	WoS	7870	An assessment of the effectiveness of a large, national-scale invasive alien plant control strategy in South Africa	van Wilgen, B. W., Forsyth, G. G., Le Maitre, D. C., Wannenburgh, A., KotzÃ©, J. D., van den Berg, E., & Henderson, L.	NA	2012	English	Peer-reviewed article	NA	Yes	Plantae	Tracheophyta	Magnoliopsida	Sapindales	Meliaceae	Melia	Melia azedarach	NA	Syringa	Terrestrial	terrestrial	NA	NA	NA	NA	Africa	South Africa	NA	South Africa	Country	1995-2008	Period	1995	2008	1995	2008	Potentially ongoing	3.85357e+07	NA	NA	5.71917e+06	1.15835e+07	2.96429e+06	408512	827396	ZAR	2008	Effective
109	1918	WoS	7870	An assessment of the effectiveness of a large, national-scale invasive alien plant control strategy in South Africa	van Wilgen, B. W., Forsyth, G. G., Le Maitre, D. C., Wannenburgh, A., KotzÃ©, J. D., van den Berg, E., & Henderson, L.	NA	2012	English	Peer-reviewed article	NA	Yes	Plantae	Tracheophyta	Magnoliopsida	Caryophyllales	Cactaceae	Diverse/Unspecified	Diverse/Unspecified	NA	Cactaceae	Terrestrial	terrestrial	NA	NA	NA	NA	Africa	South Africa	NA	South Africa	Country	1995-2008	Period	1995	2008	1995	2008	Potentially ongoing	2.16357e+07	NA	NA	3.211e+06	6.50353e+06	1.66429e+06	229357	464538	ZAR	2008	Effective
110	1919	WoS	7870	An assessment of the effectiveness of a large, national-scale invasive alien plant control strategy in South Africa	van Wilgen, B. W., Forsyth, G. G., Le Maitre, D. C., Wannenburgh, A., KotzÃ©, J. D., van den Berg, E., & Henderson, L.	NA	2012	English	Peer-reviewed article	NA	Yes	Plantae	Tracheophyta	Pinopsida	Pinales	Pinaceae	Pinus	Pinus spp.	NA	Pine trees	Terrestrial	terrestrial	NA	NA	NA	NA	Africa	South Africa	NA	South Africa	Country	1995-2008	Period	1995	2008	1995	2008	Potentially ongoing	1.70393e+08	NA	NA	2.52884e+07	5.12188e+07	1.31071e+07	1.80631e+06	3.65849e+06	ZAR	2008	Effective
111	1920	WoS	7870	An assessment of the effectiveness of a large, national-scale invasive alien plant control strategy in South Africa	van Wilgen, B. W., Forsyth, G. G., Le Maitre, D. C., Wannenburgh, A., KotzÃ©, J. D., van den Berg, E., & Henderson, L.	NA	2012	English	Peer-reviewed article	NA	Yes	Plantae	Tracheophyta	Magnoliopsida	Malpighiales	Salicaceae	Populus	Populus spp.	NA	Poplar trees	Terrestrial	terrestrial	NA	NA	NA	NA	Africa	South Africa	NA	South Africa	Country	1995-2008	Period	1995	2008	1995	2008	Potentially ongoing	3.94643e+07	NA	NA	5.85698e+06	1.18627e+07	3.03571e+06	418355	847333	ZAR	2008	Effective
112	1921	WoS	7870	An assessment of the effectiveness of a large, national-scale invasive alien plant control strategy in South Africa	van Wilgen, B. W., Forsyth, G. G., Le Maitre, D. C., Wannenburgh, A., KotzÃ©, J. D., van den Berg, E., & Henderson, L.	NA	2012	English	Peer-reviewed article	NA	Yes	Plantae	Tracheophyta	Magnoliopsida	Fabales	Mimosaceae	Prosopis	Prosopis spp.	NA	Mesquite	Terrestrial	terrestrial	NA	NA	NA	NA	Africa	South Africa	NA	South Africa	Country	1995-2008	Period	1995	2008	1995	2008	Potentially ongoing	4.04393e+08	NA	NA	6.00168e+07	1.21557e+08	3.11071e+07	4.28691e+06	8.68268e+06	ZAR	2008	Effective
113	1922	WoS	7870	An assessment of the effectiveness of a large, national-scale invasive alien plant control strategy in South Africa	van Wilgen, B. W., Forsyth, G. G., Le Maitre, D. C., Wannenburgh, A., KotzÃ©, J. D., van den Berg, E., & Henderson, L.	NA	2012	English	Peer-reviewed article	NA	Yes	Plantae	Tracheophyta	Magnoliopsida	Malpighiales	Salicaceae	Salix	Salix babylonica	NA	Weeping willow	Terrestrial	terrestrial	NA	NA	NA	NA	Africa	South Africa	NA	South Africa	Country	1995-2008	Period	1995	2008	1995	2008	Potentially ongoing	7.52143e+06	NA	NA	1.11627e+06	2.26088e+06	578571	79733.6	161492	ZAR	2008	Effective
114	1923	WoS	7870	An assessment of the effectiveness of a large, national-scale invasive alien plant control strategy in South Africa	van Wilgen, B. W., Forsyth, G. G., Le Maitre, D. C., Wannenburgh, A., KotzÃ©, J. D., van den Berg, E., & Henderson, L.	NA	2012	English	Peer-reviewed article	NA	Yes	Plantae	Tracheophyta	Magnoliopsida	Solanales	Solanaceae	Solanum	Solanum mauritianum	NA	Bugweed	Terrestrial	terrestrial	NA	NA	NA	NA	Africa	South Africa	NA	South Africa	Country	1995-2008	Period	1995	2008	1995	2008	Potentially ongoing	1.12821e+08	NA	NA	1.67441e+07	3.39133e+07	8.67857e+06	1.196e+06	2.42238e+06	ZAR	2008	Effective
116	2058	Go	91	The Ecological and socio-economic impacts of invasive alien species on inland water ecosytems	Ciruna, K.A., Meyerson, L.A. & Gutierrez, A.	NA	2005	English	Official report	NA	Yes	Plantae	Tracheophyta	Liliopsida	Commelinales	Pontederiaceae	Eichhornia	Eichhornia crassipes	NA	Water hyacinth	Aquatic	aquatic	NA	NA	NA	NA	Africa	Diverse/Unspecified	NA	7 African countries (Unspecified)	Regional	NA	Year	NA	NA	2005	2005	Potentially ongoing	35000000	20000000	50000000	4.39301e+07	NA	35000000	4.39301e+07	NA	USD	2005	Publication year
117	2169	TC	167	Alien Invading Plants and Water Resources in South Africa: A preliminary assessment	Versfeld, D.B., Le Maitre, D.C. and Chapman, R.A.	NA	1998	English	Official report	Van Wilgen, B. W., Richardson, D. M., Le Maitre, D. C., Marais, C., & Magadlela, D. (2001). The economic consequences of alien plant invasions: examples of impacts and approaches to sustainable management in South Africa. Environment, development and sustainability, 3(2), 145-168.	No	Plantae	Diverse/Unspecified	Diverse/Unspecified	Diverse/Unspecified	Diverse/Unspecified	Diverse/Unspecified	Diverse/Unspecified	NA	Diverse alien plants	Diverse/Unspecified	diverse/Unspecified	NA	NA	NA	NA	Africa	South Africa	NA	South Africa	Country	NA	Year	NA	NA	1998	1998	Potentially ongoing	704000000	412000000	996000000	9.74572e+08	2.91372e+09	704000000	9.74572e+08	2.91372e+09	USD	2001	Publication year
119	2171	TC	23	The economic consequences of alien plant invasions: examples of impacts and approaches to sustainable management in South Africa.	Van Wilgen, B. W., Richardson, D. M., Le Maitre, D. C., Marais, C., & Magadlela, D.	NA	2001	English	Peer-reviewed article	NA	Yes	Plantae	Tracheophyta	Polypodiopsida	Salviniales	Salviniaceae	Azolla	Azolla filiculoides	NA	Red water fern	Aquatic	aquatic	NA	NA	NA	NA	Africa	South Africa	NA	South Africa	Country	NA	Year	NA	NA	2001	2001	One-time	51000	NA	NA	70601.1	211079	51000	70601.1	211079	USD	2001	Publication year
120	2172	TC	183	An investigation of land-use practices on the Agulhas Plain (South Africa), with emphasis on socio-economic and conservation issues	Heydenrych, B.	NA	1999	English	M.Sc. Dissertation	Van Wilgen, B. W., Richardson, D. M., Le Maitre, D. C., Marais, C., & Magadlela, D. (2001). The economic consequences of alien plant invasions: examples of impacts and approaches to sustainable management in South Africa. Environment, development and sustainability, 3(2), 145-168.	No	Plantae	Diverse/Unspecified	Diverse/Unspecified	Diverse/Unspecified	Diverse/Unspecified	Diverse/Unspecified	Diverse/Unspecified	NA	Diverse alien plants	Diverse/Unspecified	diverse/Unspecified	NA	NA	NA	NA	Africa	South Africa	NA	South Africa	Country	NA	Year	NA	NA	1999	1999	One-time	5600000	NA	NA	7.75228e+06	2.31773e+07	5600000	7.75228e+06	2.31773e+07	USD	2001	Publication year
121	2173	TC	23	The economic consequences of alien plant invasions: examples of impacts and approaches to sustainable management in South Africa.	Van Wilgen, B. W., Richardson, D. M., Le Maitre, D. C., Marais, C., & Magadlela, D.	NA	2001	English	Peer-reviewed article	NA	Yes	Plantae	Tracheophyta	Magnoliopsida	Caryophyllales	Cactaceae	Opuntia	Opuntia aurantiaca	NA	Jointed cactus	Terrestrial	terrestrial	NA	NA	NA	NA	Africa	South Africa	NA	South Africa	Country	40 years (Exact Unspecified period)	Period	1961	2001	1961	2001	One-time	12000000	NA	NA	1.6612e+07	4.96656e+07	300000	415300	1.24164e+06	USD	2001	Publication year
123	2175	TC	263	Economic consequences of alien infestation of the Cape Floral Kingdomâ€™s Fynbos vegetation	Turpie, J. and Heydenrych, B.	NA	2000	English	Book chapter	Van Wilgen, B. W., Richardson, D. M., Le Maitre, D. C., Marais, C., & Magadlela, D. (2001). The economic consequences of alien plant invasions: examples of impacts and approaches to sustainable management in South Africa. Environment, development and sustainability, 3(2), 145-168.	No	Plantae	Diverse/Unspecified	Diverse/Unspecified	Diverse/Unspecified	Diverse/Unspecified	Diverse/Unspecified	Diverse/Unspecified	NA	Diverse alien plants	Diverse/Unspecified	diverse/Unspecified	NA	NA	NA	NA	Africa	South Africa	NA	Agulhas National Park, 20 000 ha	Site	NA	Year	NA	NA	2000	2000	Potentially ongoing	3200000000	NA	NA	4.42987e+09	1.32442e+10	3200000000	4.42987e+09	1.32442e+10	USD	2001	Publication year
124	2176	TC	22	Conflicts of interest in environmental management: estimating the costs and benefits of a tree invasion.	De Wit, M. P., Crookes, D. J., & Van Wilgen, B. W.	NA	2001	English	Peer-reviewed article	Van Wilgen, B. W., Richardson, D. M., Le Maitre, D. C., Marais, C., & Magadlela, D. (2001). The economic consequences of alien plant invasions: examples of impacts and approaches to sustainable management in South Africa. Environment, development and sustainability, 3(2), 145-168.	Yes	Plantae	Tracheophyta	Magnoliopsida	Fabales	Fabaceae	Acacia	Acacia mearnsii	NA	Black wattle	Terrestrial	terrestrial	NA	NA	NA	NA	Africa	South Africa	NA	South Africa	Country	1998	Year	1998	NA	1998	1998	Potentially ongoing	1425000000	NA	NA	2.14281e+09	4.85738e+09	1425000000	2.14281e+09	4.85738e+09	USD	1998	Effective
125	2177	TC	22	Conflicts of interest in environmental management: estimating the costs and benefits of a tree invasion.	De Wit, M. P., Crookes, D. J., & Van Wilgen, B. W.	NA	2001	English	Peer-reviewed article	Van Wilgen, B. W., Richardson, D. M., Le Maitre, D. C., Marais, C., & Magadlela, D. (2001). The economic consequences of alien plant invasions: examples of impacts and approaches to sustainable management in South Africa. Environment, development and sustainability, 3(2), 145-168.	Yes	Plantae	Tracheophyta	Magnoliopsida	Fabales	Fabaceae	Acacia	Acacia mearnsii	NA	Black wattle	Terrestrial	terrestrial	NA	NA	NA	NA	Africa	South Africa	NA	South Africa	Country	1998	Year	1998	NA	1998	1998	Potentially ongoing	1000000	NA	NA	1.50372e+06	3.40869e+06	1000000	1.50372e+06	3.40869e+06	USD	1998	Effective
126	2178	TC	167	Alien Invading Plants and Water Resources in South Africa: A preliminary assessment	Versfeld, D.B., Le Maitre, D.C. and Chapman, R.A.	NA	1998	English	Official report	Van Wilgen, B. W., Richardson, D. M., Le Maitre, D. C., Marais, C., & Magadlela, D. (2001). The economic consequences of alien plant invasions: examples of impacts and approaches to sustainable management in South Africa. Environment, development and sustainability, 3(2), 145-168.	No	Plantae	Diverse/Unspecified	Diverse/Unspecified	Diverse/Unspecified	Diverse/Unspecified	Diverse/Unspecified	Diverse/Unspecified	NA	Diverse alien plants	Diverse/Unspecified	diverse/Unspecified	NA	NA	NA	NA	Africa	South Africa	NA	South Africa	Country	20 years (Unspecified period)	Period	1998	2018	1998	2018	Potentially ongoing	1200000000	NA	NA	1.6612e+09	4.96656e+09	60000000	8.30601e+07	2.48328e+08	USD	2001	Publication year
127	2179	TC	23	The economic consequences of alien plant invasions: examples of impacts and approaches to sustainable management in South Africa.	Van Wilgen, B. W., Richardson, D. M., Le Maitre, D. C., Marais, C., & Magadlela, D.	NA	2001	English	Peer-reviewed article	NA	Yes	Plantae	Diverse/Unspecified	Diverse/Unspecified	Diverse/Unspecified	Diverse/Unspecified	Diverse/Unspecified	Diverse/Unspecified	NA	Diverse alien plants	Diverse/Unspecified	diverse/Unspecified	NA	NA	NA	NA	Africa	South Africa	NA	South Africa	Country	20 years (Unspecified period)	Period	2001	2021	2001	2021	Potentially ongoing	400000000	NA	NA	5.53734e+08	1.65552e+09	20000000	2.76867e+07	8.2776e+07	USD	2001	Publication year
128	2180	TC	23	The economic consequences of alien plant invasions: examples of impacts and approaches to sustainable management in South Africa.	Van Wilgen, B. W., Richardson, D. M., Le Maitre, D. C., Marais, C., & Magadlela, D.	NA	2001	English	Peer-reviewed article	NA	Yes	Plantae	Tracheophyta	Magnoliopsida	Fabales	Fabaceae	Acacia	Acacia sp.	NA	Australian Acacia species	Terrestrial	terrestrial	NA	NA	NA	NA	Africa	South Africa	NA	South Africa	Country	4 years (1997-2000)	Period	1997	2000	1997	2000	One-time	2250000	NA	NA	4.153e+06	9.3123e+06	750000	1.03825e+06	3.1041e+06	USD	2001	Publication year
129	2199	TC	25	Costs, benefits and management options for an invasive alien tree species: The case of mesquite in the Northern Cape, South Africa.	Wise, R. M., Van Wilgen, B. W., & Le Maitre, D. C.	NA	2012	English	Peer-reviewed article	NA	Yes	Plantae	Tracheophyta	Magnoliopsida	Fabales	Mimosaceae	Prosopis	Prosopis sp.	NA	Mesquite	Terrestrial	terrestrial	NA	NA	NA	NA	Africa	South Africa	NA	Northern Cape Province	Site	30 years	Year	2012	2042	2012	2042	Potentially ongoing	9.33333e+06	5000000	1.36667e+07	9.96447e+06	1.65764e+07	9.33333e+06	9.96447e+06	1.65764e+07	USD	2012	Publication year
130	2200	TC	25	Costs, benefits and management options for an invasive alien tree species: The case of mesquite in the Northern Cape, South Africa.	Wise, R. M., Van Wilgen, B. W., & Le Maitre, D. C.	NA	2012	English	Peer-reviewed article	NA	Yes	Plantae	Tracheophyta	Magnoliopsida	Fabales	Mimosaceae	Prosopis	Prosopis sp.	NA	Mesquite	Terrestrial	terrestrial	NA	NA	NA	NA	Africa	South Africa	NA	Northern Cape Province	Site	NA	Year	NA	NA	2012	2012	Potentially ongoing	5800000	NA	NA	6.19221e+06	1.0301e+07	5800000	6.19221e+06	1.0301e+07	USD	2012	Publication year
131	2201	TC	25	Costs, benefits and management options for an invasive alien tree species: The case of mesquite in the Northern Cape, South Africa.	Wise, R. M., Van Wilgen, B. W., & Le Maitre, D. C.	NA	2012	English	Peer-reviewed article	NA	Yes	Plantae	Tracheophyta	Magnoliopsida	Fabales	Mimosaceae	Prosopis	Prosopis sp.	NA	Mesquite	Terrestrial	terrestrial	NA	NA	NA	NA	Africa	South Africa	NA	Northern Cape Province, uplands	Site	Over 30 years (Unspecified)	Year	1982	2012	1982	2012	Potentially ongoing	9800000	6600000	13000000	1.04627e+07	1.74052e+07	9800000	1.04627e+07	1.74052e+07	USD	2012	Publication year
132	2202	TC	25	Costs, benefits and management options for an invasive alien tree species: The case of mesquite in the Northern Cape, South Africa.	Wise, R. M., Van Wilgen, B. W., & Le Maitre, D. C.	NA	2012	English	Peer-reviewed article	NA	Yes	Plantae	Tracheophyta	Magnoliopsida	Fabales	Mimosaceae	Prosopis	Prosopis sp.	NA	Mesquite	Terrestrial	terrestrial	NA	NA	NA	NA	Africa	South Africa	NA	Northern Cape Province, floodplains	Site	Over 30 years (Unspecified)	Year	1982	2012	1982	2012	Potentially ongoing	14000000	9500000	18500000	1.49467e+07	2.48645e+07	14000000	1.49467e+07	2.48645e+07	USD	2012	Publication year
133	2206	TC	263	Economic consequences of alien infestation of the Cape Floral Kingdomâ€™s Fynbos vegetation	Turpie, J. and B. Heydenrych	NA	2000	English	Book chapter	McNeely, J. A. (Editor). 2001. The Great Reshuffling: Human Dimensions of Invasive Alien Species. IUCN, Gland, Switzerland and Cambridge, UK. Vi + 242pp.	No	Plantae	Tracheophyta	Pinopsida/Magnoliopsida	Pinales/Proteales/Fabales	Pinaceae/Proteaceae/Fabaceae	Pinus/Hakea/Acacia	Pinus sp./Hakea sp./Acacia spp.	NA	Pines/Hakea/Acacia	Terrestrial	terrestrial	NA	NA	NA	NA	Africa	South Africa	NA	South Africa, fynbos	Site	NA	Year	NA	NA	2000	2000	Potentially ongoing	2000000000	NA	NA	2.76867e+09	8.2776e+09	2000000000	2.76867e+09	8.2776e+09	USD	2001	Publication year
134	2211	TC	577	The Great Reshuffling: Human Dimensions of Invasive Alien Species	McNeely, J. A. (Editor)	NA	2001	English	Book	NA	Yes	Plantae	Tracheophyta	Magnoliopsida	Caryophyllales	Cactaceae	Opuntia	Opuntia stricta	NA	Sour prickly pear	Terrestrial	terrestrial	NA	NA	NA	NA	Africa	South Africa	NA	Kruger National Park	Site	1998	Year	1998	NA	1998	1998	Potentially ongoing	323000	NA	NA	51937.6	1.33683e+06	323000	51937.6	1.33683e+06	ZAR	2001	Publication year
135	2212	WoS	9332	An economic assessment of the contribution of biological control to the management of invasive alien plants and to the protection of ecosystem services in South Africa	Willem J. de Lange, Brian W. van Wilgen	NA	2010	English	Peer-reviewed article	NA	Yes	Plantae	Diverse/Unspecified	Diverse/Unspecified	Diverse/Unspecified	Diverse/Unspecified	Diverse/Unspecified	Diverse/Unspecified	NA	Invasive plants	Aquatic/Terrestrial	diverse/Unspecified	NA	NA	NA	NA	Africa	South Africa	NA	South Africa	Country	NA	Year	NA	NA	2010	2010	Potentially ongoing	41700000000	NA	NA	6.4027e+09	7.50342e+10	41700000000	6.4027e+09	7.50342e+10	ZAR	2010	Publication year
136	2213	TC	56	Economic and disease burden of dengue	Shepard et al	NA	2014	English	Peer-reviewed article	NA	Yes	Animalia	Arthropoda	Insecta	Diptera	Culicidae	Aedes	Aedes aegypti/Aedes albopictus	NA	Yellow fever mosquito/Asian tiger mosquito	Terrestrial	semi-aquatic	NA	NA	NA	NA	Africa	Diverse/Unspecified	NA	NA	Continental	2001-2010	Period	2001	2010	2001	2010	One-time	765000000	NA	NA	8.33632e+08	NA	76500000	8.33632e+07	NA	USD	2011	Publication year
137	NE4398	Go	AFR3	Evaluation of the peach fruit fly problem in Egypt, with recommendatons for its control and eradication, including a limited cost-benefit analysis	A. Joomaye, J. Knight et W. Routhier	NA	1999	French	Grey literature	FAO. 2001. La situation mondiale de l'alimentation t de l'agriculture en 2001	No	Animalia	Arthropoda	Insecta	Diptera	Tephritidae	Ceratitis	Ceratitis capitata	NA	Mouche mÃ©diterranÃ©enne des fruits	Terrestrial	terrestrial	NA	NA	NA	NA	Africa	Egypt	NA	NA	Country	1 year	Year	NA	NA	1999	1999	One-time	100000000	NA	NA	1.47153e+08	NA	100000000	1.47153e+08	NA	USD	1999	Publication year
138	NE4399	Go	AFR_20	NOTE Dâ€™ENGAGEMENT PROJET. RESSOURCE. Renforcement dâ€™Expertise au Sud du Sahara sur les Oiseaux et leur Utilisation Rationnelle en faveur des CommunauteÌs et de leur Environnent	Fonds FranÃ§ais pour l'Environnement (FFEM)	NA	2016	French	Official report	NA	Yes	Plantae	Diverse/Unspecified	Diverse/Unspecified	Diverse/Unspecified	Diverse/Unspecified	Diverse/Unspecified	Diverse/Unspecified	NA	Invasive plants	Aquatic/Terrestrial/Semi-aquatic	diverse/Unspecified	N	Wetland	10	Y	Africa	Senegal	NA	Les Trois Marigots	Site	5 years	Period	2017	2021	2017	2021	One-time	10000	NA	NA	11304.8	NA	2000	2260.96	NA	EUR	2016	Publication year
139	NE4400	GS	AFR_21	Evaluation de la prolifÃ©ration de la jacinthe d'eau du lac Ravelobe Ankarafantsika et plan de restauration	Hery Lisy Tiana Ranarijaona, FÃ©licie Zainabo, Andriamanentena Ainazo Herilala, Andrianasetra Georges Simon	The floating water hyacinth or Eicchornia crassipes invades Madagascar waters lotics and lentics. It's the case of the lake Ravelobe, inside the national park of Ankarafantsika Mahajanga Madagascar, which, besides crocodiles, is very renowned by its wealth endemic fishes, amphibians, aquatic turtle, and birds. In spite of the measures taken by the persons in charge of the park in 2007, by manual …	2013	French	Peer-reviewed article	NA	Yes	Plantae	Tracheophyta	Liliopsida	Liliales	Pontederiaceae	Eichhornia	Eichhornia crassipes	NA	Water hyacinth	Aquatic	aquatic	Y	Aquatic	11	Y	Africa	Madagascar	NA	Lac Ravelobe/ National Park of Ankarafantsika/ Mahajanga	Site	1 year	Year	2007	2007	2007	2007	Potentially ongoing	2491000	NA	NA	1187.66	3627.66	2491000	1187.66	3627.66	MGA	2013	Publication year
140	NE4401	GS	AFR_22	RentabilitÃ© de la pÃªche pratiquÃ©e sur le lac de Taabo couvert partiellement par les vÃ©gÃ©taux aquatiques envahissants sur la pÃ©riode 2002-2005	Kouakou Serge Roland Ble Acca	La prÃ©sence des vÃ©gÃ©taux aquatiques envahissants (VAE) sur le lac de Taabo empÃªche l'exercice des activitÃ©s de pÃªche et par consÃ©quent fait perdre des revenus aux pÃªcheurs. Le coÃ»t total des dommages causÃ©s par les VAE aux pÃªcheurs Ã©valuÃ© sur la pÃ©riode 2002-2005 s'Ã©lÃ¨ve Ã 140 905 825 FCFA. L'analyse coÃ»ts-avantages de la pratique de la pÃªche sur le lac de Taabo a montrÃ© que la…	2008	French	Official report	NA	Yes	Plantae	Diverse/Unspecified	Diverse/Unspecified	Diverse/Unspecified	Diverse/Unspecified	Diverse/Unspecified	Diverse/Unspecified	NA	Invasive plants	Aquatic	aquatic	N	Aquatic	11	N	Africa	Ivory Coast	NA	Lac Taabo	Site	4 years	Period	2002	2005	2002	2005	Potentially ongoing	140905825	NA	NA	358236	740422	3.52265e+07	89558.9	185106	XOF	2008	Publication year
141	NE4402	GS	AFR_25	Evaluation des microorganismes fongiques en tant qu'agents de lutte biologique contre Eichhornia crassipes (Martius) Solms-Laubach dans le bassin du fleuve Niger au Mali	Karim Dagno	Problems of the water hyacinth, Eichhornia crassipes, in the tropical and subtropical areas of the world, in particular its eradication using biological control by means of plant pathogens. Water hyacinth, probably originating from South America, grows between 35th North and South parallels of the planet. It was introduced into several regions of the world as ornamental plant, where it became lat…	2006	French	Master thesis	SynthÃ¨se bibliographique : problÃ©matique de la jacinthe d'eau, Eichhornia crassipes, dans les rÃ©gions tropicales et subtropicales du monde, notamment son Ã©radication par la lutte biologique au moyen des phytopathogÃ¨nes, Dagno et al. (2007), Biotechnol. Agron. Soc. Environ. 2007, 11 (4)	No	Plantae	Tracheophyta	Liliopsida	Liliales	Pontederiaceae	Eichhornia	Eichhornia crassipes	NA	Water hyacinth	Aquatic	aquatic	N	Aquatic	11	N	Africa	Mali	NA	Mali	Country	1 year	Year	2006	2006	2006	2006	Potentially ongoing	91667	83334	100000	111460	NA	91667	111460	NA	USD	2006	Publication year
142	NE4403	TC	AFR_26	Plan de gestion du parc du Parc National des Oiseaux de Djoudj	Direction des Parcs Nationaux (RÃ©publique du SÃ©nÃ©gal)	NA	2017	French	Official report	SÃ©nÃ©gal : le Parc national des oiseaux du Djoudj, un monument naturel menacÃ©, TRIPLET, GUEYE et GUISSE, Faune sauvage numÃ©ro 319, 2018	Yes	Plantae	Tracheophyta	Liliopsida	Typhales	Typhaceae	Typha	Typha sp.	NA	Typha	Aquatic	semi-aquatic	N	Aquatic	11	Y	Africa	Senegal	NA	Parc national des oiseaux de Djoudj	Site	5 years	Period	2017	2021	2017	2021	One-time	40000	NA	NA	68.7174	178.734	8000	13.7435	35.7468	XOF	2017	Publication year
143	NE4404	TC	AFR_26	Plan de gestion du parc du Parc National des Oiseaux de Djoudj	Direction des Parcs Nationaux (RÃ©publique du SÃ©nÃ©gal)	NA	2017	French	Official report	SÃ©nÃ©gal : le Parc national des oiseaux du Djoudj, un monument naturel menacÃ©, TRIPLET, GUEYE et GUISSE, Faune sauvage numÃ©ro 319, 2018	Yes	Plantae	Diverse/Unspecified	Diverse/Unspecified	Diverse/Unspecified	Diverse/Unspecified	Diverse/Unspecified	Diverse/Unspecified	NA	Invasive floating plants	Diverse/Unspecified	aquatic	N	Aquatic	11	Y	Africa	Senegal	NA	Parc national des oiseaux de Djoudj	Site	5 years	Period	2017	2021	2017	2021	One-time	29000	NA	NA	49.8201	129.582	5800	9.96402	25.9164	XOF	2017	Publication year
144	NE4405	TC	AFR_26	Plan de gestion du parc du Parc National des Oiseaux de Djoudj	Direction des Parcs Nationaux (RÃ©publique du SÃ©nÃ©gal)	NA	2017	French	Official report	SÃ©nÃ©gal : le Parc national des oiseaux du Djoudj, un monument naturel menacÃ©, TRIPLET, GUEYE et GUISSE, Faune sauvage numÃ©ro 319, 2018	Yes	Plantae	Diverse/Unspecified	Diverse/Unspecified	Diverse/Unspecified	Diverse/Unspecified	Diverse/Unspecified	Diverse/Unspecified	NA	Invasive plants	Aquatic	aquatic	N	Aquatic	11	Y	Africa	Senegal	NA	Parc national des oiseaux de Djoudj	Site	5 years	Period	2017	2021	2017	2021	One-time	28000	NA	NA	48.1022	125.114	5600	9.62043	25.0227	XOF	2017	Publication year
146	NE4407	GS	AFR_28	Le cocotier dans l'Archipel des Comores	M. Delorme	NA	1973	French	Peer-reviewed article	NA	Yes	Animalia	Chordata	Mammalia	Rodentia	Muridae	Rattus	Rattus rattus	NA	Rat noir	Terrestrial	terrestrial	Y	Sandy	5	N	Africa	Comoros	NA	Comoros	Country	3 years	Period	NA	NA	1973	1976	One-time	140000000	130000000	150000000	1.73383e+07	NA	35000000	4.33457e+06	NA	MGA	1973	Publication year
147	NE4408	GS	AFR_29	La maÃ®trise de l'enherbement des cultures de cÃ©rÃ©ales en CÃ´te d'Ivoire	P. Verner, T.H. Gbaka, K.E. Tehia, P. Marnotte	In forest areas of CÃ´te d'Ivoire, rainfed rice is widely grown following slash-and-burn, and is sometimes intercropped with maize. However, smallholders are often forced to abandon their fields, even before soil fertility problems arise, because of the invasion weed Chromolaena odorata. From 1989 to 1991, IDESSA (Institut des savanes) conducted a herbicide control research programme using 2,4-D …	1995	French	Peer-reviewed article	NA	Yes	Plantae	Tracheophyta	Magnoliopsida	Asterales	Asteraceae	Chromolaena	Chromolaena odorata	NA	Siam weed	Terrestrial	terrestrial	N	Agricultural Habitat: rice culture	12b	N	Africa	Ivory Coast	NA	Ivory Coast	Country	10-15 days	Year	NA	NA	1995	1995	Potentially ongoing	15000	NA	NA	95.6985	239.83	15000	95.6985	239.83	XOF	1991	Effective
148	NE4409	GS	AFR_30	Etude de l'embroussaillement par l'herbe du Laos de trois zones d'action agro-pastorales en RÃ©publique Centrafricaine par images satellite Spot	Alain Le Masson	NA	1986	French	Official report	NA	Yes	Plantae	Tracheophyta	Magnoliopsida	Asterales	Asteraceae	Chromolaena	Chromolaena odorata	NA	Siam weed	Terrestrial	terrestrial	N	Agricultural Habitat	12b	N	Africa	Central African Republic	NA	Agro Pastorale de Yeremo action area	Site	NA	Year	NA	NA	1986	1986	One-time	11300000	NA	NA	72971.5	NA	11300000	72971.5	NA	XAF	1986	Publication year
149	NE4410	GS	AFR_30	Etude de l'embroussaillement par l'herbe du Laos de trois zones d'action agro-pastorales en RÃ©publique Centrafricaine par images satellite Spot	Alain Le Masson	NA	1986	French	Official report	NA	Yes	Plantae	Tracheophyta	Magnoliopsida	Asterales	Asteraceae	Chromolaena	Chromolaena odorata	NA	Siam weed	Terrestrial	terrestrial	N	Agricultural Habitat	12b	N	Africa	Central African Republic	NA	Central African Republic	Country	120 days	Year	NA	NA	1986	1986	Potentially ongoing	3400000	NA	NA	21956	NA	3400000	21956	NA	XAF	1986	Publication year
151	NE4412	Go	AFR_32	Chromolaena odorata dans les palmeraies du BÃ©nin : incidence et mÃ©thodes de lutte	Isaac Adje A., RÃ©nÃ© Affoyon	Chromolaena odorata (L), constitue une des adventices les plus redoutables dans les plantations du palmier Ã Huile du Sud-BÃ©nin. Elle peut entraÃ®ner une baisse de production de rÃ©gimes allant de 15 Ã 30%, ce qui constitue un important manque Ã gagner dans les conditions particuliÃ¨rement limites de culture de palmier Ã huile au BÃ©nin. La principale mÃ©thode de lutte pratiquÃ©e jusqu'ici est l…	1994	French	Official report	NA	Yes	Plantae	Tracheophyta	Magnoliopsida	Asterales	Asteraceae	Chromolaena	Chromolaena odorata	NA	Siam weed	Terrestrial	terrestrial	N	Agricultural Habitat	12b	N	Africa	Benin	NA	PobÃ©/ ObÃ¨kÃ¨-OuÃ¨rÃ¨	Site	2 years	Period	1992	1993	1992	1993	Potentially ongoing	14450	NA	NA	43.0399	163.022	7225	21.52	81.5111	XOF	1994	Publication year
152	NE4413	Go	AFR_33	Impact de la jacinthe d'eau douce sur la mobilisation des eaux de surface au Burkina Faso	Justine Rutabagaya	NA	2017	French	Master thesis	NA	Yes	Plantae	Tracheophyta	Liliopsida	Liliales	Pontederiaceae	Eichhornia	Eichhornia crassipes	NA	Water hyacinth	Aquatic	aquatic	N	Aquatic	11	N	Africa	Burkina Faso	NA	Burkina Faso	Country	NA	Year	NA	NA	2017	2017	Potentially ongoing	20000000	NA	NA	34358.7	99825.6	20000000	34358.7	99825.6	XOF	2017	Publication year
155	NE4416	Go	AFR_33	Impact de la jacinthe d'eau douce sur la mobilisation des eaux de surface au Burkina Faso	Justine Rutabagaya	NA	2017	French	Master thesis	NA	Yes	Plantae	Tracheophyta	Liliopsida	Liliales	Pontederiaceae	Eichhornia	Eichhornia crassipes	NA	Water hyacinth	Aquatic	aquatic	N	Aquatic	11	N	Africa	Burkina Faso	NA	Burkina Faso	Country	NA	Year	NA	NA	2017	2017	Potentially ongoing	60000000	NA	NA	103076	299477	60000000	103076	299477	XOF	2017	Publication year
157	NE4418	Go	AFR_34	Gestion durable de la chenille lÃ©gionnaire d'automne en Afrique, Programme d'action de la FAO	FAO	NA	2017	French	Official report	NA	Yes	Animalia	Arthropoda	Insecta	Lepidoptera	Noctuidae	Spodoptera	Spodoptera frugiperda	NA	Grass worm	Terrestrial	terrestrial	N	Agricultural Habitat: corn culture	12b	N	Africa	Zambia	NA	Zambia	Country	NA	Year	2017	2017	2017	2017	One-time	3000000	NA	NA	3000000	NA	3000000	3000000	NA	USD	2017	Publication year
158	NE4419	Go	AFR_34	Gestion durable de la chenille lÃ©gionnaire d'automne en Afrique, Programme d'action de la FAO	FAO	NA	2017	French	Official report	NA	Yes	Animalia	Arthropoda	Insecta	Lepidoptera	Noctuidae	Spodoptera	Spodoptera frugiperda	NA	Grass worm	Terrestrial	terrestrial	N	Agricultural Habitat: corn culture	12b	N	Africa	Ghana	NA	Ghana	Country	NA	Year	NA	NA	2017	2017	One-time	4000000	NA	NA	4000000	NA	4000000	4000000	NA	USD	2017	Publication year
159	NE4420	Go	AFR_35	Les chenilles lÃ©gionnaires Ã l'assaut du continent africain	Espoir Olodo	NA	2018	French	Newspaper	NA	Yes	Animalia	Arthropoda	Insecta	Lepidoptera	Noctuidae	Spodoptera	Spodoptera frugiperda	NA	Grass worm	Terrestrial	terrestrial	N	Agricultural Habitat: corn sorghum and millet culture	12b	N	Africa	Angola	NA	Angola	Country	NA	NA	NA	2017	2017	2017	Potentially ongoing	1800000	NA	NA	1800000	NA	1800000	1800000	NA	USD	2017	Publication year
163	NE4424	Go	AFR_35	Les chenilles lÃ©gionnaires Ã l'assaut du continent africain	Espoir Olodo	NA	2018	French	Newspaper	NA	Yes	Animalia	Arthropoda	Insecta	Lepidoptera	Noctuidae	Spodoptera	Spodoptera frugiperda	NA	Grass worm	Terrestrial	terrestrial	N	Agricultural Habitat	12b	N	Africa	African Countries	NA	16 African Countries	Continental	NA	Year	NA	NA	2017	2017	Potentially ongoing	4250000000	2400000000	6100000000	4250000000	NA	4250000000	4250000000	NA	USD	2017	Publication year
165	NE4426	Go	AFR_36	Atelier de renforcement des capacitÃ©s des Etats Membres de la CEDEAO pour lutter contre l'invasion de Spodoptera Frugiperda en Afrique de l'Ouest, Abuja (Nigeria) du 5 au 10 septembre 2017, Compte-Rendu d'Atelier	Yobo Gustave Tizie, Colette Guessan	NA	2017	French	Workshop proceedings	NA	Yes	Animalia	Arthropoda	Insecta	Lepidoptera	Noctuidae	Spodoptera	Spodoptera frugiperda	NA	Grass worm	Terrestrial	terrestrial	N	Agricultural Habitat: corn culture	12b	N	Africa	Nigeria	NA	Nigeria	Country	2 years	Year	2017	2018	2017	2018	One-time	465000	NA	NA	465000	NA	465000	465000	NA	USD	2017	Publication year
166	NE4427	Go	AFR_37	Banque Africaine de DÃ©veloppement, Approbation du Conseil, ProcÃ©dure de non-objection, Proposition visant l'octroi d'un don de 1000000 Dollars EU au titre de l'aide d'urgence pour la lutte contre l'invasion de la chenille lÃ©gionnaire d'automne	Vincent Nmehielle	NA	2018	French	Official report	NA	Yes	Animalia	Arthropoda	Insecta	Lepidoptera	Noctuidae	Spodoptera	Spodoptera frugiperda	NA	Grass worm	Terrestrial	terrestrial	N	Agricultural Habitat	12b	N	Africa	Guinea-Bissau	NA	Guinea-Bissau	Country	2 years	Year	2018	2019	2018	2019	One-time	1000000	NA	NA	976157	NA	1000000	976157	NA	USD	2018	Publication year
167	NE4428	Go	AFR_37	Banque Africaine de DÃ©veloppement, Approbation du Conseil, ProcÃ©dure de non-objection, Proposition visant l'octroi d'un don de 1000000 Dollars EU au titre de l'aide d'urgence pour la lutte contre l'invasion de la chenille lÃ©gionnaire d'automne	Vincent Nmehielle	NA	2018	French	Official report	NA	Yes	Animalia	Arthropoda	Insecta	Lepidoptera	Noctuidae	Spodoptera	Spodoptera frugiperda	NA	Grass worm	Terrestrial	terrestrial	N	Agricultural Habitat	12b	N	Africa	Guinea-Bissau	NA	Guinea-Bissau	Country	3 years	Year	2018	2019	2018	2019	One-time	212000	NA	NA	206945	NA	212000	206945	NA	USD	2018	Publication year
169	SC21	GS	vanWilgen1996	Valuation of ecosystem services	van Wilgen BW, Cowling RM, Burgers CJ	NA	1996	English	Peer-reviewed article	Le Maitre, D. C., Van Wilgen, B. W., Chapman, R. A., & McKelly, D. H. (1996). Invasive plants and water resources in the Western Cape Province, South Africa: modelling the consequences of a lack of management.Â Journal of applied ecology, 161-172.	Yes	Plantae	Diverse/Unspecified	Diverse/Unspecified	Diverse/Unspecified	Diverse/Unspecified	Diverse/Unspecified	Diverse/Unspecified	NA	Diverse/Unspecified	Aquatic/Terrestrial	diverse/Unspecified	N	NA	3	N	Africa	South Africa	NA	Western Cape Province	Unit(10,000ha)	Unspecified/Yearly	Year	NA	NA	1996	1996	Potentially ongoing	8	NA	NA	12.5021	25.0473	8	12.5021	25.0473	USD	1996	Publication year
170	SC27	NA	Leavold2007	Development of case studies on the economic impacts of invasive species in Africa: Salvinia molesta	Leavold, V. Lloyd, L. and Lepetit, J.	This report details the results of an extensive desktop study to quantify the economic impacts of an invasive weed species in Africa. Salvinia molesta (Salvinia) is a floating water weed found in the lower Senegal River delta in Senegal. Salvinia reproduces vegetatively, is easily spread by flowing water as well as by stock, vehicles and water craft. The plant forms a thick mat on the waterâ€™s s…	2007	English	Peer-reviewed article	NA	Yes	Plantae	Tracheophyta	Polypodiopsida	Salviniales	Salviniaceae	Salvinia	Salvinia molesta	NA	Kariba weed	Aquatic	aquatic	N	NA	NA	N	Africa	Senegal	NA	Lower Senegal Delta	Unit (Delta)	2005	Year	2005	2005	2005	2005	One-time	12	NA	NA	15.0618	36.2172	12	15.0618	36.2172	USD	2005	Effective
171	SC30	NA	Leavold2007	Development of case studies on the economic impacts of invasive species in Africa: Salvinia molesta	Leavold, V. Lloyd, L. and Lepetit, J.	This report details the results of an extensive desktop study to quantify the economic impacts of an invasive weed species in Africa. Salvinia molesta (Salvinia) is a floating water weed found in the lower Senegal River delta in Senegal. Salvinia reproduces vegetatively, is easily spread by flowing water as well as by stock, vehicles and water craft. The plant forms a thick mat on the waterâ€™s s…	2007	English	Peer-reviewed article	NA	Yes	Plantae	Tracheophyta	Polypodiopsida	Salviniales	Salviniaceae	Salvinia	Salvinia molesta	NA	Kariba weed	Aquatic	aquatic	N	NA	NA	N	Africa	Senegal	NA	Lower Senegal Delta	Unit (Delta)	2005	Year	2005	2005	2005	2005	One-time	19	NA	NA	23.8478	57.3439	19	23.8478	57.3439	USD	2005	Effective
172	SC32	NA	Hosking1999	A cost-benefit analysis of removing alien trees in the Tsitsikamma mountain catchment	Hosking, S.G. and du Preez, M.	The removal of water-consuming alien vegetation and restoration of low water-consumlng indigenous vegetation, the Working for Water Programme, is the biggest conservation project In terms of manpower use currently being undertaken In South Africa. During 1998 about 40 000 jobs were created in It. The economic case for the programme in selected mountain catchments in the Western Cape has already b…	1999	English	Peer-reviewed article	NA	Yes	Plantae	Tracheophyta	Pinopsida	Pinales	Pinaceae	Pinus	Pinus sp.	NA	Pine	Terrestrial	terrestrial	N	NA	NA	N	Africa	South Africa	NA	Tsitsikamma	Unit (~29 600 ha)	1995	Year	1995	2030	1995	2030	Potentially ongoing	35	NA	NA	8.43008	20.1041	35	8.43008	20.1041	ZAR	1999	Publication year
173	SC33	NA	Wise2007	The Economic Impact and Appropriate Management of Selected Invasive Alien Species on the African Continent	Wise, R.M., van Wilgen, B.W., Hill, M.P., Schulthess, F., Tweddle, D., Chabi-Olay, A. and Zimmermann, H.G.	This report provides case studies of the economic impact of five invasive alien species in different areas in Africa. The overall aim of this work was to provide detailed information to administrators and managers. The species were: â€¢ Nile tilapia (Oreochromis niloticus); â€¢ Water hyacinth (Eichhornia crassipes); â€¢ The larger grain borer (Prostephanus truncatus); â€¢ Parthenium weed (Parthen…	2007	English	Official report	NA	Yes	Plantae	Tracheophyta	Magnoliopsida	Asterales	Asteraceae	Chromolaena	Chromolaena odorata	NA	Triffid weed	Terrestrial	terrestrial	N	NA	NA	N	Africa	South Africa	NA	South Africa	Site	2006	Period	2006	2006	2006	2006	One-time	35	NA	NA	42.5572	79.9517	35	42.5572	79.9517	USD	2006	Effective
174	SC34	NA	Wise2007	The Economic Impact and Appropriate Management of Selected Invasive Alien Species on the African Continent	Wise, R.M., van Wilgen, B.W., Hill, M.P., Schulthess, F., Tweddle, D., Chabi-Olay, A. and Zimmermann, H.G.	This report provides case studies of the economic impact of five invasive alien species in different areas in Africa. The overall aim of this work was to provide detailed information to administrators and managers. The species were: â€¢ Nile tilapia (Oreochromis niloticus); â€¢ Water hyacinth (Eichhornia crassipes); â€¢ The larger grain borer (Prostephanus truncatus); â€¢ Parthenium weed (Parthen…	2007	English	Official report	NA	Yes	Plantae	Tracheophyta	Magnoliopsida	Asterales	Asteraceae	Chromolaena	Chromolaena odorata	NA	Triffid weed	Terrestrial	terrestrial	N	NA	NA	N	Africa	South Africa	NA	South Africa	Site	2006	Period	2006	2006	2006	2006	One-time	35	NA	NA	42.5572	79.9517	35	42.5572	79.9517	USD	2006	Effective
175	SC35	NA	Wise2007	The Economic Impact and Appropriate Management of Selected Invasive Alien Species on the African Continent	Wise, R.M., van Wilgen, B.W., Hill, M.P., Schulthess, F., Tweddle, D., Chabi-Olay, A. and Zimmermann, H.G.	This report provides case studies of the economic impact of five invasive alien species in different areas in Africa. The overall aim of this work was to provide detailed information to administrators and managers. The species were: â€¢ Nile tilapia (Oreochromis niloticus); â€¢ Water hyacinth (Eichhornia crassipes); â€¢ The larger grain borer (Prostephanus truncatus); â€¢ Parthenium weed (Parthen…	2007	English	Official report	NA	Yes	Plantae	Tracheophyta	Liliopsida	Commelinales	Pontederiaceae	Eichhornia	Eichhornia crassipes	NA	Water hyacinth	Aquatic	aquatic	N	NA	NA	N	Africa	South Africa	NA	Nseleni River	Unit (100 ha)	2006	Period	2006	2006	2006	2006	One-time	36	NA	NA	43.7732	82.2361	36	43.7732	82.2361	USD	2006	Effective
176	SC37	NA	Hosking1999	A cost-benefit analysis of removing alien trees in the Tsitsikamma mountain catchment	Hosking, S.G. and du Preez, M.	The removal of water-consuming alien vegetation and restoration of low water-consumlng indigenous vegetation, the Working for Water Programme, is the biggest conservation project In terms of manpower use currently being undertaken In South Africa. During 1998 about 40 000 jobs were created in It. The economic case for the programme in selected mountain catchments in the Western Cape has already b…	1999	English	Peer-reviewed article	NA	Yes	Plantae	Tracheophyta	Pinopsida	Pinales	Pinaceae	Pinus	Pinus sp.	NA	Pine	Terrestrial	terrestrial	N	NA	NA	N	Africa	South Africa	NA	Tsitsikamma	Unit (~29 600 ha)	1995	Year	1995	2030	1995	2030	Potentially ongoing	40	NA	NA	9.63438	22.9761	40	9.63438	22.9761	ZAR	1999	Publication year
177	SC38	NA	Wise2007	The Economic Impact and Appropriate Management of Selected Invasive Alien Species on the African Continent	Wise, R.M., van Wilgen, B.W., Hill, M.P., Schulthess, F., Tweddle, D., Chabi-Olay, A. and Zimmermann, H.G.	This report provides case studies of the economic impact of five invasive alien species in different areas in Africa. The overall aim of this work was to provide detailed information to administrators and managers. The species were: â€¢ Nile tilapia (Oreochromis niloticus); â€¢ Water hyacinth (Eichhornia crassipes); â€¢ The larger grain borer (Prostephanus truncatus); â€¢ Parthenium weed (Parthen…	2007	English	Official report	NA	Yes	Plantae	Tracheophyta	Magnoliopsida	Asterales	Asteraceae	Chromolaena	Chromolaena odorata	NA	Triffid weed	Terrestrial	terrestrial	N	NA	NA	N	Africa	South Africa	NA	South Africa	Unit (1670 ha)	2006	Period	2006	2006	2006	2006	One-time	40	NA	NA	48.6368	91.3734	40	48.6368	91.3734	USD	2006	Effective
178	SC39	NA	Hosking1999	A cost-benefit analysis of removing alien trees in the Tsitsikamma mountain catchment	Hosking, S.G. and du Preez, M.	The removal of water-consuming alien vegetation and restoration of low water-consumlng indigenous vegetation, the Working for Water Programme, is the biggest conservation project In terms of manpower use currently being undertaken In South Africa. During 1998 about 40 000 jobs were created in It. The economic case for the programme in selected mountain catchments in the Western Cape has already b…	1999	English	Peer-reviewed article	NA	Yes	Plantae	Tracheophyta	Pinopsida	Pinales	Pinaceae	Pinus	Pinus sp.	NA	Pine	Terrestrial	terrestrial	N	NA	NA	N	Africa	South Africa	NA	Tsitsikamma	Unit (~29 600 ha)	1995	Year	1995	2030	1995	2030	Potentially ongoing	40.5	NA	NA	9.75481	23.2633	40.5	9.75481	23.2633	ZAR	1999	Publication year
179	SC40	NA	Hosking1999	A cost-benefit analysis of removing alien trees in the Tsitsikamma mountain catchment	Hosking, S.G. and du Preez, M.	The removal of water-consuming alien vegetation and restoration of low water-consumlng indigenous vegetation, the Working for Water Programme, is the biggest conservation project In terms of manpower use currently being undertaken In South Africa. During 1998 about 40 000 jobs were created in It. The economic case for the programme in selected mountain catchments in the Western Cape has already b…	1999	English	Peer-reviewed article	NA	Yes	Plantae	Tracheophyta	Pinopsida	Pinales	Pinaceae	Pinus	Pinus sp.	NA	Pine	Terrestrial	terrestrial	N	NA	NA	N	Africa	South Africa	NA	Tsitsikamma	Unit (~29 600 ha)	1995	Year	1995	2030	1995	2030	Potentially ongoing	44.5	NA	NA	10.7182	25.561	44.5	10.7182	25.561	ZAR	1999	Publication year
180	SC41	NA	Wise2007	The Economic Impact and Appropriate Management of Selected Invasive Alien Species on the African Continent	Wise, R.M., van Wilgen, B.W., Hill, M.P., Schulthess, F., Tweddle, D., Chabi-Olay, A. and Zimmermann, H.G.	This report provides case studies of the economic impact of five invasive alien species in different areas in Africa. The overall aim of this work was to provide detailed information to administrators and managers. The species were: â€¢ Nile tilapia (Oreochromis niloticus); â€¢ Water hyacinth (Eichhornia crassipes); â€¢ The larger grain borer (Prostephanus truncatus); â€¢ Parthenium weed (Parthen…	2007	English	Official report	NA	Yes	Plantae	Tracheophyta	Magnoliopsida	Asterales	Asteraceae	Parthenium	Parthenium hysterophorus	NA	Parthenium weed	Terrestrial	terrestrial	N	NA	NA	N	Africa	South Africa	NA	South Africa	Site	2006	Period	2006	2006	2006	2006	One-time	45	NA	NA	54.7165	102.795	45	54.7165	102.795	USD	2006	Effective
181	SC42	NA	Macdonall&Wissel1992	Determining optimal clearing treatments for the alien invasive shrub Acacia saligna in the southwestern Cape, South Africa	Macdonald, I.A.W., Wissel, C.	The results of a replicated field-scale trial of a range of control treatments for Acacia saligna were used to create a probabilistic model of the effects of repeated treatment applications. Using estimates of costs per plant treated for each treatment and for each of four size classes of plants, it was possible to compute the costs for every treatment combination. A Markov-chain model was create…	1992	English	Peer-reviewed article	Macdonall&Wissel1989	Yes	Plantae	Tracheophyta	Magnoliopsida	Fabales	Fabaceae	Acacia	Acacia saligna	NA	Port Jackson willow	Terrestrial	terrestrial	N	Fynbos	3	N	Africa	South Africa	NA	Southwestern Cape	Site	1992-1996	Period	1992	1996	1992	1996	Potentially ongoing	46	NA	NA	73.5726	171.741	9.2	14.7145	34.3481	ZAR	1984	Effective
182	SC43	NA	Nielsen2005	Efficacy and costs of handheld sprayers in the subhumid savanna for cogongrass control	Nielsen OK Chikoye D Streibig JC	Cogongrass continues to be one of the most invasive weeds in the subhumid savanna. Herbicide application expenses depend on equipment costs, costs of water transport for spraying, and chemical costs. In three on-farm experiments on land heavily infested with cogongrass, the effectiveness of a knapsack sprayer (KS), a very low volume sprayer (VLV), and a rope wick (RW) applicator was tested at Ija…	2005	English	Peer-reviewed article	NA	Yes	Plantae	Tracheophyta	Liliopsida	Cyperales	Poaceae	Imperata	Imperata cylindrica	NA	Cogongrass	Terrestrial	terrestrial	N	sub-humid savanna	4	N	Africa	Nigeria	NA	Ijaye	Site	2000-2001	Period	2000	2001	2000	2001	Potentially ongoing	46	NA	NA	61.2938	241.949	23	30.6469	120.974	USD	2003	Effective
183	SC44	NA	Hosking1999	A cost-benefit analysis of removing alien trees in the Tsitsikamma mountain catchment	Hosking, S.G. and du Preez, M.	The removal of water-consuming alien vegetation and restoration of low water-consumlng indigenous vegetation, the Working for Water Programme, is the biggest conservation project In terms of manpower use currently being undertaken In South Africa. During 1998 about 40 000 jobs were created in It. The economic case for the programme in selected mountain catchments in the Western Cape has already b…	1999	English	Peer-reviewed article	NA	Yes	Plantae	Tracheophyta	Pinopsida	Pinales	Pinaceae	Pinus	Pinus sp.	NA	Pine	Terrestrial	terrestrial	N	NA	NA	N	Africa	South Africa	NA	Tsitsikamma	Unit (~29 600 ha)	1995	Year	1995	2030	1995	2030	Potentially ongoing	46	NA	NA	11.0795	26.4226	46	11.0795	26.4226	ZAR	1999	Publication year
184	SC45	NA	Nielsen2005	Efficacy and costs of handheld sprayers in the subhumid savanna for cogongrass control	Nielsen OK Chikoye D Streibig JC	Cogongrass continues to be one of the most invasive weeds in the subhumid savanna. Herbicide application expenses depend on equipment costs, costs of water transport for spraying, and chemical costs. In three on-farm experiments on land heavily infested with cogongrass, the effectiveness of a knapsack sprayer (KS), a very low volume sprayer (VLV), and a rope wick (RW) applicator was tested at Ija…	2005	English	Peer-reviewed article	NA	Yes	Plantae	Tracheophyta	Liliopsida	Cyperales	Poaceae	Imperata	Imperata cylindrica	NA	Cogongrass	Terrestrial	terrestrial	N	sub-humid savanna	4	N	Africa	Nigeria	NA	Ijaye	Site	2000-2001	Period	2000	2001	2000	2001	Potentially ongoing	55	NA	NA	73.286	289.287	27.5	36.643	144.643	USD	2003	Effective
185	SC48	NA	Macdonall&Wissel1992	Determining optimal clearing treatments for the alien invasive shrub Acacia saligna in the southwestern Cape, South Africa	Macdonald, I.A.W., Wissel, C.	The results of a replicated field-scale trial of a range of control treatments for Acacia saligna were used to create a probabilistic model of the effects of repeated treatment applications. Using estimates of costs per plant treated for each treatment and for each of four size classes of plants, it was possible to compute the costs for every treatment combination. A Markov-chain model was create…	1992	English	Peer-reviewed article	Macdonall&Wissel1989	Yes	Plantae	Tracheophyta	Magnoliopsida	Fabales	Fabaceae	Acacia	Acacia saligna	NA	Port Jackson willow	Terrestrial	terrestrial	N	Fynbos	3	N	Africa	South Africa	NA	Southwestern Cape	Site	1992-1996	Period	1992	1996	1992	1996	Potentially ongoing	64	NA	NA	102.362	238.943	12.8	20.4724	47.7887	ZAR	1984	Effective
186	SC49	NA	Wise2007	The Economic Impact and Appropriate Management of Selected Invasive Alien Species on the African Continent	Wise, R.M., van Wilgen, B.W., Hill, M.P., Schulthess, F., Tweddle, D., Chabi-Olay, A. and Zimmermann, H.G.	This report provides case studies of the economic impact of five invasive alien species in different areas in Africa. The overall aim of this work was to provide detailed information to administrators and managers. The species were: â€¢ Nile tilapia (Oreochromis niloticus); â€¢ Water hyacinth (Eichhornia crassipes); â€¢ The larger grain borer (Prostephanus truncatus); â€¢ Parthenium weed (Parthen…	2007	English	Official report	NA	Yes	Plantae	Tracheophyta	Liliopsida	Commelinales	Pontederiaceae	Eichhornia	Eichhornia crassipes	NA	Water hyacinth	Aquatic	aquatic	N	NA	NA	N	Africa	South Africa	NA	Nseleni River	Unit (410 ha)	2006	Period	2006	2006	2006	2006	One-time	64	NA	NA	77.819	146.197	64	77.819	146.197	USD	2006	Effective
187	SC50	NA	Leavold2007	Development of case studies on the economic impacts of invasive species in Africa: Salvinia molesta	Leavold, V. Lloyd, L. and Lepetit, J.	This report details the results of an extensive desktop study to quantify the economic impacts of an invasive weed species in Africa. Salvinia molesta (Salvinia) is a floating water weed found in the lower Senegal River delta in Senegal. Salvinia reproduces vegetatively, is easily spread by flowing water as well as by stock, vehicles and water craft. The plant forms a thick mat on the waterâ€™s s…	2007	English	Peer-reviewed article	Triplet et al., 2000	Yes	Plantae	Tracheophyta	Polypodiopsida	Salviniales	Salviniaceae	Salvinia	Salvinia molesta	NA	Kariba weed	Aquatic	aquatic	N	NA	NA	N	Africa	Senegal	NA	Senegal	Unit (200 ha)	2000	Period	2000	2000	2000	2000	One-time	67	NA	NA	84.0948	202.213	67	84.0948	202.213	USD	2005	Effective
188	SC52	NA	Wise2007	The Economic Impact and Appropriate Management of Selected Invasive Alien Species on the African Continent	Wise, R.M., van Wilgen, B.W., Hill, M.P., Schulthess, F., Tweddle, D., Chabi-Olay, A. and Zimmermann, H.G.	This report provides case studies of the economic impact of five invasive alien species in different areas in Africa. The overall aim of this work was to provide detailed information to administrators and managers. The species were: â€¢ Nile tilapia (Oreochromis niloticus); â€¢ Water hyacinth (Eichhornia crassipes); â€¢ The larger grain borer (Prostephanus truncatus); â€¢ Parthenium weed (Parthen…	2007	English	Official report	NA	Yes	Plantae	Tracheophyta	Magnoliopsida	Asterales	Asteraceae	Parthenium	Parthenium hysterophorus	NA	Parthenium weed	Terrestrial	terrestrial	N	NA	NA	N	Africa	South Africa	NA	South Africa	Site	2006	Period	2006	2006	2006	2006	One-time	70	NA	NA	85.1145	159.903	70	85.1145	159.903	USD	2006	Effective
189	SC54	NA	Leavold2007	Development of case studies on the economic impacts of invasive species in Africa: Salvinia molesta	Leavold, V. Lloyd, L. and Lepetit, J.	This report details the results of an extensive desktop study to quantify the economic impacts of an invasive weed species in Africa. Salvinia molesta (Salvinia) is a floating water weed found in the lower Senegal River delta in Senegal. Salvinia reproduces vegetatively, is easily spread by flowing water as well as by stock, vehicles and water craft. The plant forms a thick mat on the waterâ€™s s…	2007	English	Peer-reviewed article	Triplet et al., 2000	Yes	Plantae	Tracheophyta	Polypodiopsida	Salviniales	Salviniaceae	Salvinia	Salvinia molesta	NA	Kariba weed	Aquatic	aquatic	N	NA	NA	N	Africa	Senegal	NA	Senegal	Unit (200 ha)	2000	Period	2000	2000	2000	2000	One-time	71	NA	NA	89.1154	214.285	71	89.1154	214.285	USD	2005	Effective
190	SC56	NA	Hosking1999	A cost-benefit analysis of removing alien trees in the Tsitsikamma mountain catchment	Hosking, S.G. and du Preez, M.	The removal of water-consuming alien vegetation and restoration of low water-consumlng indigenous vegetation, the Working for Water Programme, is the biggest conservation project In terms of manpower use currently being undertaken In South Africa. During 1998 about 40 000 jobs were created in It. The economic case for the programme in selected mountain catchments in the Western Cape has already b…	1999	English	Peer-reviewed article	NA	Yes	Plantae	Tracheophyta	Pinopsida	Pinales	Pinaceae	Pinus	Pinus sp.	NA	Pine	Terrestrial	terrestrial	N	NA	NA	N	Africa	South Africa	NA	South Dakota	Unit (~29 600 ha)	1995	Year	1995	2030	1995	2030	Potentially ongoing	78	NA	NA	18.787	44.8035	78	18.787	44.8035	ZAR	1999	Publication year
191	SC57	NA	Wise2007	The Economic Impact and Appropriate Management of Selected Invasive Alien Species on the African Continent	Wise, R.M., van Wilgen, B.W., Hill, M.P., Schulthess, F., Tweddle, D., Chabi-Olay, A. and Zimmermann, H.G.	This report provides case studies of the economic impact of five invasive alien species in different areas in Africa. The overall aim of this work was to provide detailed information to administrators and managers. The species were: â€¢ Nile tilapia (Oreochromis niloticus); â€¢ Water hyacinth (Eichhornia crassipes); â€¢ The larger grain borer (Prostephanus truncatus); â€¢ Parthenium weed (Parthen…	2007	English	Official report	NA	Yes	Plantae	Tracheophyta	Magnoliopsida	Asterales	Asteraceae	Chromolaena	Chromolaena odorata	NA	Triffid weed	Terrestrial	terrestrial	N	NA	NA	N	Africa	South Africa	NA	South Africa	Site	2006	Period	2006	2006	2006	2006	One-time	83	NA	NA	100.921	189.6	83	100.921	189.6	USD	2006	Effective
192	SC59	NA	Nielsen2005	Efficacy and costs of handheld sprayers in the subhumid savanna for cogongrass control	Nielsen OK Chikoye D Streibig JC	Cogongrass continues to be one of the most invasive weeds in the subhumid savanna. Herbicide application expenses depend on equipment costs, costs of water transport for spraying, and chemical costs. In three on-farm experiments on land heavily infested with cogongrass, the effectiveness of a knapsack sprayer (KS), a very low volume sprayer (VLV), and a rope wick (RW) applicator was tested at Ija…	2005	English	Peer-reviewed article	NA	Yes	Plantae	Tracheophyta	Liliopsida	Cyperales	Poaceae	Imperata	Imperata cylindrica	NA	Cogongrass	Terrestrial	terrestrial	N	sub-humid savanna	4	N	Africa	Nigeria	NA	Ijaye	Site	2000-2001	Period	2000	2001	2000	2001	Potentially ongoing	90	NA	NA	119.923	473.378	45	59.9613	236.689	USD	2003	Effective
193	SC63	NA	Hosking1999	A cost-benefit analysis of removing alien trees in the Tsitsikamma mountain catchment	Hosking, S.G. and du Preez, M.	The removal of water-consuming alien vegetation and restoration of low water-consumlng indigenous vegetation, the Working for Water Programme, is the biggest conservation project In terms of manpower use currently being undertaken In South Africa. During 1998 about 40 000 jobs were created in It. The economic case for the programme in selected mountain catchments in the Western Cape has already b…	1999	English	Peer-reviewed article	NA	Yes	Plantae	Tracheophyta	Magnoliopsida	Fabales	Fabaceae	Acacia	Acacia mearnsii	NA	Black wattle	Terrestrial	terrestrial	N	NA	NA	N	Africa	South Africa	NA	Tsitsikamma	Unit (~29 600 ha)	1995	Year	1995	2030	1995	2030	Potentially ongoing	106	NA	NA	25.5311	60.8868	106	25.5311	60.8868	ZAR	1999	Publication year
194	SC64	NA	Wise2012	Costs, benefits and management options for an invasive alien tree species: The case of mesquite in the Northern Cape, South Africa	Wise, R.M., van Wilgen, B.W., Le Maitre, D. C.	Mesquite (Prosopis species) were introduced to South Africa to provide fodder and shade for livestock, but some have become invasive, impacting on water and grazing resources. Mesquiteâ€™s net economic effects are unclear and their unequal distribution leads to conflict. We estimated the value of mesquite invasions in the Northern Cape Province for different scenarios, differentiating between pro…	2012	English	Peer-reviewed article	Department of Water Affairs and Forestry, 2008. Working for Water Information Management System (WIMS) e 2001 to 2006 Data for All Prosopis Operations in South Africa, Cape Town. Department of Water Affairs and Forestry (DWAF).	Yes	Plantae	Tracheophyta	Magnoliopsida	Fabales	Fabaceae	Prosopis	Prosopis sp.	NA	Mesquite	Terrestrial	terrestrial	N	NA	NA	N	Africa	South Africa	NA	Northern Cape	Unit(33,733 ha)	2009	Year	2009	2009	2009	2009	One-time	106.7	NA	NA	113.915	189.644	106.7	113.915	189.644	USD	2012	Publication year
195	SC65	NA	Macdonall&Wissel1992	Determining optimal clearing treatments for the alien invasive shrub Acacia saligna in the southwestern Cape, South Africa	Macdonald, I.A.W., Wissel, C.	The results of a replicated field-scale trial of a range of control treatments for Acacia saligna were used to create a probabilistic model of the effects of repeated treatment applications. Using estimates of costs per plant treated for each treatment and for each of four size classes of plants, it was possible to compute the costs for every treatment combination. A Markov-chain model was create…	1992	English	Peer-reviewed article	Macdonall&Wissel1989	Yes	Plantae	Tracheophyta	Magnoliopsida	Fabales	Fabaceae	Acacia	Acacia saligna	NA	Port Jackson willow	Terrestrial	terrestrial	N	Fynbos	3	N	Africa	South Africa	NA	Southwestern Cape	Site	1992-1996	Period	1992	1996	1992	1996	Potentially ongoing	111	NA	NA	177.534	414.417	22.2	35.5068	82.8835	ZAR	1984	Effective
196	SC67	NA	Hosking2002	Evaluating the environmental use of water - Selected case studies in the eastern and southern cape	Hosking SG; du Preez M; Campbell E.E; Wooldrige T.H. & du Plessis L.L.	South Africa is a drought-prone, water-poor region (Burgers, Marais & Bekker 1995:101). It has a mean annual rainfall of only 502mm and a mean annual runoff of only 42mm (420m3/ha/a) and for these reasons it seems very probable that water shortages will limit economic development in South Africa during the Twenty-first century (Briers & Powell 1993:1). Consequently, it is imperative that its wate…	2002	English	Official report	Versveld et al 1998.	Yes	Plantae	Tracheophyta	Magnoliopsida	Diverse/Unspecified	Diverse/Unspecified	Diverse/Unspecified	Diverse/Unspecified	NA	Tall shrubs and other alien species	Terrestrial	terrestrial	N	NA	NA	NA	Africa	South Africa	NA	NA	Country	Approximatelly 2012	Year	2012	2012	2012	2012	Potentially ongoing	116	NA	NA	31.5526	71.8369	116	31.5526	71.8369	ZAR	1998	Publication year
197	SC68	NA	Wise2012	Costs, benefits and management options for an invasive alien tree species: The case of mesquite in the Northern Cape, South Africa	Wise, R.M., van Wilgen, B.W., Le Maitre, D. C.	Mesquite (Prosopis species) were introduced to South Africa to provide fodder and shade for livestock, but some have become invasive, impacting on water and grazing resources. Mesquiteâ€™s net economic effects are unclear and their unequal distribution leads to conflict. We estimated the value of mesquite invasions in the Northern Cape Province for different scenarios, differentiating between pro…	2012	English	Peer-reviewed article	Department of Water Affairs and Forestry, 2008. Working for Water Information Management System (WIMS) e 2001 to 2006 Data for All Prosopis Operations in South Africa, Cape Town. Department of Water Affairs and Forestry (DWAF).	Yes	Plantae	Tracheophyta	Magnoliopsida	Fabales	Fabaceae	Prosopis	Prosopis sp.	NA	Mesquite	Terrestrial	terrestrial	N	NA	NA	N	Africa	South Africa	NA	Northern Cape	Unit(34 471 ha)	2010-2041	Year	2010	2041	2010	2041	Potentially ongoing	122	NA	NA	130.25	216.838	122	130.25	216.838	USD	2012	Publication year
198	SC70	NA	Wise2007	The Economic Impact and Appropriate Management of Selected Invasive Alien Species on the African Continent	Wise, R.M., van Wilgen, B.W., Hill, M.P., Schulthess, F., Tweddle, D., Chabi-Olay, A. and Zimmermann, H.G.	This report provides case studies of the economic impact of five invasive alien species in different areas in Africa. The overall aim of this work was to provide detailed information to administrators and managers. The species were: â€¢ Nile tilapia (Oreochromis niloticus); â€¢ Water hyacinth (Eichhornia crassipes); â€¢ The larger grain borer (Prostephanus truncatus); â€¢ Parthenium weed (Parthen…	2007	English	Official report	NA	Yes	Plantae	Tracheophyta	Magnoliopsida	Asterales	Asteraceae	Chromolaena	Chromolaena odorata	NA	Triffid weed	Terrestrial	terrestrial	N	NA	NA	N	Africa	South Africa	NA	South Africa	Site	2006	Period	2006	2006	2006	2006	One-time	125	NA	NA	151.99	285.542	125	151.99	285.542	USD	2006	Effective
199	SC76	NA	Hosking2002	Evaluating the environmental use of water - Selected case studies in the eastern and southern cape	Hosking SG; du Preez M; Campbell E.E; Wooldrige T.H. & du Plessis L.L.	South Africa is a drought-prone, water-poor region (Burgers, Marais & Bekker 1995:101). It has a mean annual rainfall of only 502mm and a mean annual runoff of only 42mm (420m3/ha/a) and for these reasons it seems very probable that water shortages will limit economic development in South Africa during the Twenty-first century (Briers & Powell 1993:1). Consequently, it is imperative that its wate…	2002	English	Official report	Versveld1998	Yes	Plantae	Tracheophyta	Magnoliopsida	Diverse/Unspecified	Diverse/Unspecified	Diverse/Unspecified	Diverse/Unspecified	NA	Tall trees other than acacia, eucalyptus, pines and hakeas	Terrestrial	terrestrial	N	NA	NA	NA	Africa	South Africa	NA	NA	Country	Approximatelly 2009	Year	2009	2009	2009	2009	Potentially ongoing	136	NA	NA	36.9928	84.2226	136	36.9928	84.2226	ZAR	1998	Publication year
200	SC77	NA	Wise2007	The Economic Impact and Appropriate Management of Selected Invasive Alien Species on the African Continent	Wise, R.M., van Wilgen, B.W., Hill, M.P., Schulthess, F., Tweddle, D., Chabi-Olay, A. and Zimmermann, H.G.	This report provides case studies of the economic impact of five invasive alien species in different areas in Africa. The overall aim of this work was to provide detailed information to administrators and managers. The species were: â€¢ Nile tilapia (Oreochromis niloticus); â€¢ Water hyacinth (Eichhornia crassipes); â€¢ The larger grain borer (Prostephanus truncatus); â€¢ Parthenium weed (Parthen…	2007	English	Official report	NA	Yes	Plantae	Tracheophyta	Magnoliopsida	Asterales	Asteraceae	Chromolaena	Chromolaena odorata	NA	Triffid weed	Terrestrial	terrestrial	N	NA	NA	N	Africa	South Africa	NA	South Africa	Site	2006	Period	2006	2006	2006	2006	One-time	140	NA	NA	170.229	319.807	140	170.229	319.807	USD	2006	Effective
201	SC79	NA	Hosking2002	Evaluating the environmental use of water - Selected case studies in the eastern and southern cape	Hosking SG; du Preez M; Campbell E.E; Wooldrige T.H. & du Plessis L.L.	South Africa is a drought-prone, water-poor region (Burgers, Marais & Bekker 1995:101). It has a mean annual rainfall of only 502mm and a mean annual runoff of only 42mm (420m3/ha/a) and for these reasons it seems very probable that water shortages will limit economic development in South Africa during the Twenty-first century (Briers & Powell 1993:1). Consequently, it is imperative that its wate…	2002	English	Official report	Versveld1998	Yes	Plantae	Tracheophyta	Magnoliopsida	Myrtales	Myrtaceae	Eucalyptus	Eucalyptus sp.	NA	Eucalyptus	Terrestrial	terrestrial	N	NA	NA	NA	Africa	South Africa	NA	NA	Country	Approximatelly 2003	Year	2003	2003	2003	2003	Potentially ongoing	145	NA	NA	39.4408	89.7961	145	39.4408	89.7961	ZAR	1998	Publication year
202	SC80	NA	Macdonall&Wissel1992	Determining optimal clearing treatments for the alien invasive shrub Acacia saligna in the southwestern Cape, South Africa	Macdonald, I.A.W., Wissel, C.	The results of a replicated field-scale trial of a range of control treatments for Acacia saligna were used to create a probabilistic model of the effects of repeated treatment applications. Using estimates of costs per plant treated for each treatment and for each of four size classes of plants, it was possible to compute the costs for every treatment combination. A Markov-chain model was create…	1992	English	Peer-reviewed article	Macdonall&Wissel1989	Yes	Plantae	Tracheophyta	Magnoliopsida	Fabales	Fabaceae	Acacia	Acacia saligna	NA	Port Jackson willow	Terrestrial	terrestrial	N	Fynbos	3	N	Africa	South Africa	NA	Southwestern Cape	Site	1992-1996	Period	1992	1996	1992	1996	Potentially ongoing	147	NA	NA	235.113	548.823	29.4	47.0225	109.765	ZAR	1984	Effective
203	SC81	NA	Hosking2002	Evaluating the environmental use of water - Selected case studies in the eastern and southern cape	Hosking SG; du Preez M; Campbell E.E; Wooldrige T.H. & du Plessis L.L.	South Africa is a drought-prone, water-poor region (Burgers, Marais & Bekker 1995:101). It has a mean annual rainfall of only 502mm and a mean annual runoff of only 42mm (420m3/ha/a) and for these reasons it seems very probable that water shortages will limit economic development in South Africa during the Twenty-first century (Briers & Powell 1993:1). Consequently, it is imperative that its wate…	2002	English	Official report	Versveld1998	Yes	Plantae	Tracheophyta	Magnoliopsida	Diverse/Unspecified	Diverse/Unspecified	Diverse/Unspecified	Diverse/Unspecified	NA	Tall shrubs and other alien species	Terrestrial	terrestrial	N	NA	NA	NA	Africa	South Africa	NA	NA	Country	Approximatelly 2012	Year	2012	2012	2012	2012	Potentially ongoing	150	NA	NA	40.8008	92.8925	150	40.8008	92.8925	ZAR	1998	Publication year
204	SC83	NA	Wise2007	The Economic Impact and Appropriate Management of Selected Invasive Alien Species on the African Continent	Wise, R.M., van Wilgen, B.W., Hill, M.P., Schulthess, F., Tweddle, D., Chabi-Olay, A. and Zimmermann, H.G.	This report provides case studies of the economic impact of five invasive alien species in different areas in Africa. The overall aim of this work was to provide detailed information to administrators and managers. The species were: â€¢ Nile tilapia (Oreochromis niloticus); â€¢ Water hyacinth (Eichhornia crassipes); â€¢ The larger grain borer (Prostephanus truncatus); â€¢ Parthenium weed (Parthen…	2007	English	Official report	NA	Yes	Animalia	Arthropoda	Insecta	Coleoptera	Bostrichidae	Prostephanus	Prostephanus truncatus	NA	Larger grain borer	Terrestrial	terrestrial	N	NA	NA	N	Africa	Benin	NA	Benin	Site	2006	Period	2006	2006	2006	2006	One-time	151	NA	NA	183.604	471.655	151	183.604	471.655	USD	2006	Effective
205	SC84	NA	Leavold2007	Development of case studies on the economic impacts of invasive species in Africa: Salvinia molesta	Leavold, V. Lloyd, L. and Lepetit, J.	This report details the results of an extensive desktop study to quantify the economic impacts of an invasive weed species in Africa. Salvinia molesta (Salvinia) is a floating water weed found in the lower Senegal River delta in Senegal. Salvinia reproduces vegetatively, is easily spread by flowing water as well as by stock, vehicles and water craft. The plant forms a thick mat on the waterâ€™s s…	2007	English	Peer-reviewed article	Chikwenhere and Keswani, 1997	Yes	Plantae	Tracheophyta	Polypodiopsida	Salviniales	Salviniaceae	Salvinia	Salvinia molesta	NA	Kariba weed	Aquatic	aquatic	N	NA	NA	N	Africa	Zimbabwe	NA	Zimbabwe	Unit (16 ha)	1989	Period	1989	1989	1989	1989	One-time	156	NA	NA	195.803	722.869	156	195.803	722.869	USD	2005	Effective
206	SC87	NA	Hosking2002	Evaluating the environmental use of water - Selected case studies in the eastern and southern cape	Hosking SG; du Preez M; Campbell E.E; Wooldrige T.H. & du Plessis L.L.	South Africa is a drought-prone, water-poor region (Burgers, Marais & Bekker 1995:101). It has a mean annual rainfall of only 502mm and a mean annual runoff of only 42mm (420m3/ha/a) and for these reasons it seems very probable that water shortages will limit economic development in South Africa during the Twenty-first century (Briers & Powell 1993:1). Consequently, it is imperative that its wate…	2002	English	Official report	Versveld1998	Yes	Plantae	Tracheophyta	Magnoliopsida	Fabales	Fabaceae	Acacia	Acacia sp.	NA	Acacia	Terrestrial	terrestrial	N	NA	NA	NA	Africa	South Africa	NA	NA	Country	Approximatelly 2000	Year	2000	2000	2000	2000	Potentially ongoing	169	NA	NA	45.9689	104.659	169	45.9689	104.659	ZAR	1998	Publication year
207	SC88	NA	Wise2012	Costs, benefits and management options for an invasive alien tree species: The case of mesquite in the Northern Cape, South Africa	Wise, R.M., van Wilgen, B.W., Le Maitre, D. C.	Mesquite (Prosopis species) were introduced to South Africa to provide fodder and shade for livestock, but some have become invasive, impacting on water and grazing resources. Mesquiteâ€™s net economic effects are unclear and their unequal distribution leads to conflict. We estimated the value of mesquite invasions in the Northern Cape Province for different scenarios, differentiating between pro…	2012	English	Peer-reviewed article	Department of Water Affairs and Forestry, 2008. Working for Water Information Management System (WIMS) e 2001 to 2006 Data for All Prosopis Operations in South Africa, Cape Town. Department of Water Affairs and Forestry (DWAF).	Yes	Plantae	Tracheophyta	Magnoliopsida	Fabales	Fabaceae	Prosopis	Prosopis sp.	NA	Mesquite	Terrestrial	terrestrial	N	NA	NA	N	Africa	South Africa	NA	Northern Cape	Unit(7698 ha)	2009	Year	2009	2009	2009	2009	One-time	169.1	NA	NA	180.535	300.551	169.1	180.535	300.551	USD	2012	Publication year
208	SC89	NA	Wise2012	Costs, benefits and management options for an invasive alien tree species: The case of mesquite in the Northern Cape, South Africa	Wise, R.M., van Wilgen, B.W., Le Maitre, D. C.	Mesquite (Prosopis species) were introduced to South Africa to provide fodder and shade for livestock, but some have become invasive, impacting on water and grazing resources. Mesquiteâ€™s net economic effects are unclear and their unequal distribution leads to conflict. We estimated the value of mesquite invasions in the Northern Cape Province for different scenarios, differentiating between pro…	2012	English	Peer-reviewed article	Department of Water Affairs and Forestry, 2008. Working for Water Information Management System (WIMS) e 2001 to 2006 Data for All Prosopis Operations in South Africa, Cape Town. Department of Water Affairs and Forestry (DWAF).	Yes	Plantae	Tracheophyta	Magnoliopsida	Fabales	Fabaceae	Prosopis	Prosopis sp.	NA	Mesquite	Terrestrial	terrestrial	N	NA	NA	N	Africa	South Africa	NA	Northern Cape	Unit(34 471 ha)	2010-2041	Year	2010	2041	2010	2041	Potentially ongoing	170.11	NA	NA	181.613	302.347	170.11	181.613	302.347	USD	2012	Publication year
209	SC90	NA	Macdonall&Wissel1992	Determining optimal clearing treatments for the alien invasive shrub Acacia saligna in the southwestern Cape, South Africa	Macdonald, I.A.W., Wissel, C.	The results of a replicated field-scale trial of a range of control treatments for Acacia saligna were used to create a probabilistic model of the effects of repeated treatment applications. Using estimates of costs per plant treated for each treatment and for each of four size classes of plants, it was possible to compute the costs for every treatment combination. A Markov-chain model was create…	1992	English	Peer-reviewed article	Macdonall&Wissel1989	Yes	Plantae	Tracheophyta	Magnoliopsida	Fabales	Fabaceae	Acacia	Acacia saligna	NA	Port Jackson willow	Terrestrial	terrestrial	N	Fynbos	3	N	Africa	South Africa	NA	Southwestern Cape	Site	1992-1996	Period	1992	1996	1992	1996	Potentially ongoing	174	NA	NA	278.296	649.627	34.8	55.6593	129.925	ZAR	1984	Effective
210	SC93	NA	Wise2007	The Economic Impact and Appropriate Management of Selected Invasive Alien Species on the African Continent	Wise, R.M., van Wilgen, B.W., Hill, M.P., Schulthess, F., Tweddle, D., Chabi-Olay, A. and Zimmermann, H.G.	This report provides case studies of the economic impact of five invasive alien species in different areas in Africa. The overall aim of this work was to provide detailed information to administrators and managers. The species were: â€¢ Nile tilapia (Oreochromis niloticus); â€¢ Water hyacinth (Eichhornia crassipes); â€¢ The larger grain borer (Prostephanus truncatus); â€¢ Parthenium weed (Parthen…	2007	English	Official report	NA	Yes	Plantae	Tracheophyta	Magnoliopsida	Asterales	Asteraceae	Chromolaena	Chromolaena odorata	NA	Triffid weed	Terrestrial	terrestrial	N	NA	NA	N	Africa	South Africa	NA	South Africa	Unit (1670 ha)	2006	Period	2006	2006	2006	2006	One-time	185	NA	NA	224.945	422.602	185	224.945	422.602	USD	2006	Effective
211	SC95	NA	Hosking2002	Evaluating the environmental use of water - Selected case studies in the eastern and southern cape	Hosking SG; du Preez M; Campbell E.E; Wooldrige T.H. & du Plessis L.L.	South Africa is a drought-prone, water-poor region (Burgers, Marais & Bekker 1995:101). It has a mean annual rainfall of only 502mm and a mean annual runoff of only 42mm (420m3/ha/a) and for these reasons it seems very probable that water shortages will limit economic development in South Africa during the Twenty-first century (Briers & Powell 1993:1). Consequently, it is imperative that its wate…	2002	English	Official report	Versveld1998	Yes	Plantae	Tracheophyta	Magnoliopsida	Diverse/Unspecified	Diverse/Unspecified	Diverse/Unspecified	Diverse/Unspecified	NA	Tall shrubs and other alien species	Terrestrial	terrestrial	N	NA	NA	NA	Africa	South Africa	NA	NA	Country	Approximatelly 2012	Year	2012	2012	2012	2012	Potentially ongoing	192	NA	NA	52.2251	118.902	192	52.2251	118.902	ZAR	1998	Publication year
212	SC100	NA	Hosking2002	Evaluating the environmental use of water - Selected case studies in the eastern and southern cape	Hosking SG; du Preez M; Campbell E.E; Wooldrige T.H. & du Plessis L.L.	South Africa is a drought-prone, water-poor region (Burgers, Marais & Bekker 1995:101). It has a mean annual rainfall of only 502mm and a mean annual runoff of only 42mm (420m3/ha/a) and for these reasons it seems very probable that water shortages will limit economic development in South Africa during the Twenty-first century (Briers & Powell 1993:1). Consequently, it is imperative that its wate…	2002	English	Official report	Versveld1998	Yes	Plantae	Tracheophyta	Magnoliopsida	Diverse/Unspecified	Diverse/Unspecified	Diverse/Unspecified	Diverse/Unspecified	NA	Pines and hakeas	Terrestrial	terrestrial	N	NA	NA	NA	Africa	South Africa	NA	NA	Country	Approximatelly 2006	Year	2006	2006	2006	2006	Potentially ongoing	200	NA	NA	54.4011	123.857	200	54.4011	123.857	ZAR	1998	Publication year
213	SC102	NA	Hosking1999	A cost-benefit analysis of removing alien trees in the Tsitsikamma mountain catchment	Hosking, S.G. and du Preez, M.	The removal of water-consuming alien vegetation and restoration of low water-consumlng indigenous vegetation, the Working for Water Programme, is the biggest conservation project In terms of manpower use currently being undertaken In South Africa. During 1998 about 40 000 jobs were created in It. The economic case for the programme in selected mountain catchments in the Western Cape has already b…	1999	English	Peer-reviewed article	NA	Yes	Plantae	Tracheophyta	Magnoliopsida	Fabales	Fabaceae	Acacia	Acacia mearnsii	NA	Black wattle	Terrestrial	terrestrial	N	NA	NA	N	Africa	South Africa	NA	Tsitsikamma	Unit (~29 600 ha)	1995	Year	1995	2030	1995	2030	Potentially ongoing	206	NA	NA	49.617	118.327	206	49.617	118.327	ZAR	1999	Publication year
214	SC108	NA	Wise2007	The Economic Impact and Appropriate Management of Selected Invasive Alien Species on the African Continent	Wise, R.M., van Wilgen, B.W., Hill, M.P., Schulthess, F., Tweddle, D., Chabi-Olay, A. and Zimmermann, H.G.	This report provides case studies of the economic impact of five invasive alien species in different areas in Africa. The overall aim of this work was to provide detailed information to administrators and managers. The species were: â€¢ Nile tilapia (Oreochromis niloticus); â€¢ Water hyacinth (Eichhornia crassipes); â€¢ The larger grain borer (Prostephanus truncatus); â€¢ Parthenium weed (Parthen…	2007	English	Official report	NA	Yes	Plantae	Tracheophyta	Magnoliopsida	Asterales	Asteraceae	Chromolaena	Chromolaena odorata	NA	Triffid weed	Terrestrial	terrestrial	N	NA	NA	N	Africa	South Africa	NA	South Africa	Unit (1670 ha)	2006	Period	2006	2006	2006	2006	One-time	224	NA	NA	272.366	511.691	224	272.366	511.691	USD	2006	Effective
215	SC110	NA	Hosking2002	Evaluating the environmental use of water - Selected case studies in the eastern and southern cape	Hosking SG; du Preez M; Campbell E.E; Wooldrige T.H. & du Plessis L.L.	South Africa is a drought-prone, water-poor region (Burgers, Marais & Bekker 1995:101). It has a mean annual rainfall of only 502mm and a mean annual runoff of only 42mm (420m3/ha/a) and for these reasons it seems very probable that water shortages will limit economic development in South Africa during the Twenty-first century (Briers & Powell 1993:1). Consequently, it is imperative that its wate…	2002	English	Official report	Versveld1998	Yes	Plantae	Tracheophyta	Magnoliopsida	Diverse/Unspecified	Diverse/Unspecified	Diverse/Unspecified	Diverse/Unspecified	NA	Tall shrubs and other alien species	Terrestrial	terrestrial	N	NA	NA	NA	Africa	South Africa	NA	NA	Country	Approximatelly 2011	Year	2011	2011	2011	2011	Potentially ongoing	235	NA	NA	63.9213	145.532	235	63.9213	145.532	ZAR	1998	Publication year
216	SC112	NA	Leavold2007	Development of case studies on the economic impacts of invasive species in Africa: Salvinia molesta	Leavold, V. Lloyd, L. and Lepetit, J.	This report details the results of an extensive desktop study to quantify the economic impacts of an invasive weed species in Africa. Salvinia molesta (Salvinia) is a floating water weed found in the lower Senegal River delta in Senegal. Salvinia reproduces vegetatively, is easily spread by flowing water as well as by stock, vehicles and water craft. The plant forms a thick mat on the waterâ€™s s…	2007	English	Peer-reviewed article	Chikwenhere and Keswani, 1997	Yes	Plantae	Tracheophyta	Polypodiopsida	Salviniales	Salviniaceae	Salvinia	Salvinia molesta	NA	Kariba weed	Aquatic	aquatic	N	NA	NA	N	Africa	Zimbabwe	North Dakota	Zimbabwe	Unit (16 ha)	1989	Period	1989	1989	1989	1989	One-time	247	NA	NA	310.021	1144.54	247	310.021	1144.54	USD	2005	Effective
217	SC113	NA	Hosking2002	Evaluating the environmental use of water - Selected case studies in the eastern and southern cape	Hosking SG; du Preez M; Campbell E.E; Wooldrige T.H. & du Plessis L.L.	South Africa is a drought-prone, water-poor region (Burgers, Marais & Bekker 1995:101). It has a mean annual rainfall of only 502mm and a mean annual runoff of only 42mm (420m3/ha/a) and for these reasons it seems very probable that water shortages will limit economic development in South Africa during the Twenty-first century (Briers & Powell 1993:1). Consequently, it is imperative that its wate…	2002	English	Official report	Versveld1998	Yes	Plantae	Tracheophyta	Magnoliopsida	Diverse/Unspecified	Diverse/Unspecified	Diverse/Unspecified	Diverse/Unspecified	NA	Pines and hakeas	Terrestrial	terrestrial	N	NA	NA	NA	Africa	South Africa	NA	NA	Country	Approximatelly 2005	Year	2005	2005	2005	2005	Potentially ongoing	249	NA	NA	67.7294	154.202	249	67.7294	154.202	ZAR	1998	Publication year
218	SC116	NA	Leavold2007	Development of case studies on the economic impacts of invasive species in Africa: Salvinia molesta	Leavold, V. Lloyd, L. and Lepetit, J.	This report details the results of an extensive desktop study to quantify the economic impacts of an invasive weed species in Africa. Salvinia molesta (Salvinia) is a floating water weed found in the lower Senegal River delta in Senegal. Salvinia reproduces vegetatively, is easily spread by flowing water as well as by stock, vehicles and water craft. The plant forms a thick mat on the waterâ€™s s…	2007	English	Peer-reviewed article	NA	Yes	Plantae	Tracheophyta	Polypodiopsida	Salviniales	Salviniaceae	Salvinia	Salvinia molesta	NA	Kariba weed	Aquatic	aquatic	N	NA	NA	N	Africa	Senegal	NA	Lower Senegal Delta	Unit(Delta)	2005	Year	2005	2005	2005	2005	One-time	268	NA	NA	336.379	808.85	268	336.379	808.85	USD	2005	Effective
219	SC118	NA	Hosking2002	Evaluating the environmental use of water - Selected case studies in the eastern and southern cape	Hosking SG; du Preez M; Campbell E.E; Wooldrige T.H. & du Plessis L.L.	South Africa is a drought-prone, water-poor region (Burgers, Marais & Bekker 1995:101). It has a mean annual rainfall of only 502mm and a mean annual runoff of only 42mm (420m3/ha/a) and for these reasons it seems very probable that water shortages will limit economic development in South Africa during the Twenty-first century (Briers & Powell 1993:1). Consequently, it is imperative that its wate…	2002	English	Official report	Versveld1998	Yes	Plantae	Tracheophyta	Magnoliopsida	Myrtales	Myrtaceae	Eucalyptus	Eucalyptus sp.	NA	Eucalyptus	Terrestrial	terrestrial	N	NA	NA	NA	Africa	South Africa	NA	NA	Country	Approximatelly 2002	Year	2002	2002	2002	2002	Potentially ongoing	275	NA	NA	74.8015	170.303	275	74.8015	170.303	ZAR	1998	Publication year
220	SC119	NA	Hosking2002	Evaluating the environmental use of water - Selected case studies in the eastern and southern cape	Hosking SG; du Preez M; Campbell E.E; Wooldrige T.H. & du Plessis L.L.	South Africa is a drought-prone, water-poor region (Burgers, Marais & Bekker 1995:101). It has a mean annual rainfall of only 502mm and a mean annual runoff of only 42mm (420m3/ha/a) and for these reasons it seems very probable that water shortages will limit economic development in South Africa during the Twenty-first century (Briers & Powell 1993:1). Consequently, it is imperative that its wate…	2002	English	Official report	Versveld1998	Yes	Plantae	Tracheophyta	Magnoliopsida	Diverse/Unspecified	Diverse/Unspecified	Diverse/Unspecified	Diverse/Unspecified	NA	Tall trees other than acacia, eucalyptus, pines and hakeas	Terrestrial	terrestrial	N	NA	NA	NA	Africa	South Africa	NA	NA	Country	Approximatelly 2008	Year	2008	2008	2008	2008	Potentially ongoing	276	NA	NA	75.0735	170.922	276	75.0735	170.922	ZAR	1998	Publication year
221	SC121	NA	Borrel2011	Chemical control of invasive Psidium guajava in Swaziland: A preliminary assessment of costs and efficacy	Borrel, A.J., Brown, L.R., Slater, K.	Psidium guajava (guava) is recognised as the third most important invasive alien plant species in the moist savanna biome of South Africa, Lesotho and Swaziland. The cost of initial clearing of alien plants reaches up to R3 000-00 per ha, therefore the application of correct control methods is essential for cost-effective reduction of the spread. The aim of this study was to test the cost effecti…	2011	English	Peer-reviewed article	NA	Yes	Plantae	Tracheophyta	Magnoliopsida	Myrtales	Myrtaceae	Psidium	Psidium guajava	NA	Guava	Terrestrial	terrestrial	N	NA	4	Y	Africa	Swaziland	NA	Upper Middleveld	Unit (1 ha)	2008-2009	Year	2008	2009	2008	2009	One-time	299	NA	NA	41.2056	100.074	299	41.2056	100.074	ZAR	2008	Effective
222	SC122	NA	Hosking2002	Evaluating the environmental use of water - Selected case studies in the eastern and southern cape	Hosking SG; du Preez M; Campbell E.E; Wooldrige T.H. & du Plessis L.L.	South Africa is a drought-prone, water-poor region (Burgers, Marais & Bekker 1995:101). It has a mean annual rainfall of only 502mm and a mean annual runoff of only 42mm (420m3/ha/a) and for these reasons it seems very probable that water shortages will limit economic development in South Africa during the Twenty-first century (Briers & Powell 1993:1). Consequently, it is imperative that its wate…	2002	English	Official report	Versveld1998	Yes	Plantae	Tracheophyta	Magnoliopsida	Diverse/Unspecified	Diverse/Unspecified	Diverse/Unspecified	Diverse/Unspecified	NA	Pines and hakeas	Terrestrial	terrestrial	N	NA	NA	NA	Africa	South Africa	NA	NA	Country	Approximatelly 2006	Year	2006	2006	2006	2006	Potentially ongoing	300	NA	NA	81.6017	185.785	300	81.6017	185.785	ZAR	1998	Publication year
223	SC124	NA	Hosking2002	Evaluating the environmental use of water - Selected case studies in the eastern and southern cape	Hosking SG; du Preez M; Campbell E.E; Wooldrige T.H. & du Plessis L.L.	South Africa is a drought-prone, water-poor region (Burgers, Marais & Bekker 1995:101). It has a mean annual rainfall of only 502mm and a mean annual runoff of only 42mm (420m3/ha/a) and for these reasons it seems very probable that water shortages will limit economic development in South Africa during the Twenty-first century (Briers & Powell 1993:1). Consequently, it is imperative that its wate…	2002	English	Official report	Versveld1998	Yes	Plantae	Tracheophyta	Magnoliopsida	Diverse/Unspecified	Diverse/Unspecified	Diverse/Unspecified	Diverse/Unspecified	NA	Tall shrubs and other alien species	Terrestrial	terrestrial	N	NA	NA	NA	Africa	South Africa	NA	NA	Country	Approximatelly 2011	Year	2011	2011	2011	2011	Potentially ongoing	305	NA	NA	82.9617	188.881	305	82.9617	188.881	ZAR	1998	Publication year
224	SC125	NA	Hosking2002	Evaluating the environmental use of water - Selected case studies in the eastern and southern cape	Hosking SG; du Preez M; Campbell E.E; Wooldrige T.H. & du Plessis L.L.	South Africa is a drought-prone, water-poor region (Burgers, Marais & Bekker 1995:101). It has a mean annual rainfall of only 502mm and a mean annual runoff of only 42mm (420m3/ha/a) and for these reasons it seems very probable that water shortages will limit economic development in South Africa during the Twenty-first century (Briers & Powell 1993:1). Consequently, it is imperative that its wate…	2002	English	Official report	Versveld1998	Yes	Plantae	Tracheophyta	Magnoliopsida	Fabales	Fabaceae	Acacia	Acacia sp.	NA	Acacia	Terrestrial	terrestrial	N	NA	NA	NA	Africa	South Africa	NA	NA	Country	Approximatelly 1999	Year	1999	1999	1999	1999	Potentially ongoing	310	NA	NA	84.3217	191.978	310	84.3217	191.978	ZAR	1998	Publication year
225	SC126	TC	EMTC_15	Costs and benefits of biological control of invasive alien plants: case studies from South Africa	Van Wilgen et al	NA	2004	English	Peer-reviewed article	NA	Yes	Plantae	Tracheophyta	Magnoliopsida	Caryophyllales	Cactaceae	Opuntia	Opuntia aurantiaca	NA	Jointed Cactus	Terrestrial	terrestrial	N	NA	NA	N	Africa	South Africa	NA	South Africa	Unit (ha)	2000	Year	2000	2000	2000	2000	One-time	310	NA	NA	63.5855	161.861	310	63.5855	161.861	ZAR	2000	Effective
226	SC127	NA	Wise2012	Costs, benefits and management options for an invasive alien tree species: The case of mesquite in the Northern Cape, South Africa	Wise, R.M., van Wilgen, B.W., Le Maitre, D. C.	Mesquite (Prosopis species) were introduced to South Africa to provide fodder and shade for livestock, but some have become invasive, impacting on water and grazing resources. Mesquiteâ€™s net economic effects are unclear and their unequal distribution leads to conflict. We estimated the value of mesquite invasions in the Northern Cape Province for different scenarios, differentiating between pro…	2012	English	Peer-reviewed article	Department of Water Affairs and Forestry, 2008. Working for Water Information Management System (WIMS) e 2001 to 2006 Data for All Prosopis Operations in South Africa, Cape Town. Department of Water Affairs and Forestry (DWAF).	Yes	Plantae	Tracheophyta	Magnoliopsida	Fabales	Fabaceae	Prosopis	Prosopis sp.	NA	Mesquite	Terrestrial	terrestrial	N	NA	NA	N	Africa	South Africa	NA	Northern Cape	Unit (5117 ha)	2010-2041	Year	2010	2041	2010	2041	Potentially ongoing	310.42	NA	NA	331.411	551.728	310.42	331.411	551.728	USD	2012	Publication year
227	SC129	NA	Macdonall&Wissel1992	Determining optimal clearing treatments for the alien invasive shrub Acacia saligna in the southwestern Cape, South Africa	Macdonald, I.A.W., Wissel, C.	The results of a replicated field-scale trial of a range of control treatments for Acacia saligna were used to create a probabilistic model of the effects of repeated treatment applications. Using estimates of costs per plant treated for each treatment and for each of four size classes of plants, it was possible to compute the costs for every treatment combination. A Markov-chain model was create…	1992	English	Peer-reviewed article	Macdonall&Wissel1989	Yes	Plantae	Tracheophyta	Magnoliopsida	Fabales	Fabaceae	Acacia	Acacia saligna	NA	Port Jackson willow	Terrestrial	terrestrial	N	Fynbos	3	N	Africa	South Africa	NA	Southwestern Cape	Site	1992-1996	Period	1992	1996	1992	1996	Potentially ongoing	323	NA	NA	516.608	1205.92	64.6	103.322	241.183	ZAR	1984	Effective
228	SC130	NA	Hosking2002	Evaluating the environmental use of water - Selected case studies in the eastern and southern cape	Hosking SG; du Preez M; Campbell E.E; Wooldrige T.H. & du Plessis L.L.	South Africa is a drought-prone, water-poor region (Burgers, Marais & Bekker 1995:101). It has a mean annual rainfall of only 502mm and a mean annual runoff of only 42mm (420m3/ha/a) and for these reasons it seems very probable that water shortages will limit economic development in South Africa during the Twenty-first century (Briers & Powell 1993:1). Consequently, it is imperative that its wate…	2002	English	Official report	Versveld1998	Yes	Plantae	Tracheophyta	Magnoliopsida	Myrtales	Myrtaceae	Eucalyptus	Eucalyptus sp.	NA	Eucalyptus	Terrestrial	terrestrial	N	NA	NA	NA	Africa	South Africa	NA	NA	Country	Approximatelly 2003	Year	2003	2003	2003	2003	Potentially ongoing	323	NA	NA	87.8578	200.029	323	87.8578	200.029	ZAR	1998	Publication year
229	SC132	NA	Borrel2011	Chemical control of invasive Psidium guajava in Swaziland: A preliminary assessment of costs and efficacy	Borrel, A.J., Brown, L.R., Slater, K.	Psidium guajava (guava) is recognised as the third most important invasive alien plant species in the moist savanna biome of South Africa, Lesotho and Swaziland. The cost of initial clearing of alien plants reaches up to R3 000-00 per ha, therefore the application of correct control methods is essential for cost-effective reduction of the spread. The aim of this study was to test the cost effecti…	2011	English	Peer-reviewed article	NA	Yes	Plantae	Tracheophyta	Magnoliopsida	Myrtales	Myrtaceae	Psidium	Psidium guajava	NA	Guava	Terrestrial	terrestrial	N	NA	4	Y	Africa	Swaziland	NA	Upper Middleveld	Unit (1 ha)	2008-2009	Year	2008	2009	2008	2009	One-time	342	NA	NA	47.1314	114.466	342	47.1314	114.466	ZAR	2008	Effective
230	SC133	NA	Hosking2002	Evaluating the environmental use of water - Selected case studies in the eastern and southern cape	Hosking SG; du Preez M; Campbell E.E; Wooldrige T.H. & du Plessis L.L.	South Africa is a drought-prone, water-poor region (Burgers, Marais & Bekker 1995:101). It has a mean annual rainfall of only 502mm and a mean annual runoff of only 42mm (420m3/ha/a) and for these reasons it seems very probable that water shortages will limit economic development in South Africa during the Twenty-first century (Briers & Powell 1993:1). Consequently, it is imperative that its wate…	2002	English	Official report	Versveld1998	Yes	Plantae	Tracheophyta	Magnoliopsida	Diverse/Unspecified	Diverse/Unspecified	Diverse/Unspecified	Diverse/Unspecified	NA	Tall shrubs and other alien species	Terrestrial	terrestrial	N	NA	NA	NA	Africa	South Africa	NA	NA	Country	Approximatelly 2010	Year	2010	2010	2010	2010	Potentially ongoing	350	NA	NA	95.202	216.749	350	95.202	216.749	ZAR	1998	Publication year
231	SC136	NA	Hosking2002	Evaluating the environmental use of water - Selected case studies in the eastern and southern cape	Hosking SG; du Preez M; Campbell E.E; Wooldrige T.H. & du Plessis L.L.	South Africa is a drought-prone, water-poor region (Burgers, Marais & Bekker 1995:101). It has a mean annual rainfall of only 502mm and a mean annual runoff of only 42mm (420m3/ha/a) and for these reasons it seems very probable that water shortages will limit economic development in South Africa during the Twenty-first century (Briers & Powell 1993:1). Consequently, it is imperative that its wate…	2002	English	Official report	Versveld1998	Yes	Plantae	Tracheophyta	Magnoliopsida	Diverse/Unspecified	Diverse/Unspecified	Diverse/Unspecified	Diverse/Unspecified	NA	Tall shrubs and other alien species	Terrestrial	terrestrial	N	NA	NA	NA	Africa	South Africa	NA	NA	Country	Approximatelly 2011	Year	2011	2011	2011	2011	Potentially ongoing	390	NA	NA	106.082	241.521	390	106.082	241.521	ZAR	1998	Publication year
232	SC138	NA	Hosking2002	Evaluating the environmental use of water - Selected case studies in the eastern and southern cape	Hosking SG; du Preez M; Campbell E.E; Wooldrige T.H. & du Plessis L.L.	South Africa is a drought-prone, water-poor region (Burgers, Marais & Bekker 1995:101). It has a mean annual rainfall of only 502mm and a mean annual runoff of only 42mm (420m3/ha/a) and for these reasons it seems very probable that water shortages will limit economic development in South Africa during the Twenty-first century (Briers & Powell 1993:1). Consequently, it is imperative that its wate…	2002	English	Official report	Versveld1998	Yes	Plantae	Tracheophyta	Magnoliopsida	Diverse/Unspecified	Diverse/Unspecified	Diverse/Unspecified	Diverse/Unspecified	NA	Pines and hakeas	Terrestrial	terrestrial	N	NA	NA	NA	Africa	South Africa	NA	NA	Country	Approximatelly 2006	Year	2006	2006	2006	2006	Potentially ongoing	400	NA	NA	108.802	247.713	400	108.802	247.713	ZAR	1998	Publication year
233	SC139	NA	Wise2007	The Economic Impact and Appropriate Management of Selected Invasive Alien Species on the African Continent	Wise, R.M., van Wilgen, B.W., Hill, M.P., Schulthess, F., Tweddle, D., Chabi-Olay, A. and Zimmermann, H.G.	This report provides case studies of the economic impact of five invasive alien species in different areas in Africa. The overall aim of this work was to provide detailed information to administrators and managers. The species were: â€¢ Nile tilapia (Oreochromis niloticus); â€¢ Water hyacinth (Eichhornia crassipes); â€¢ The larger grain borer (Prostephanus truncatus); â€¢ Parthenium weed (Parthen…	2007	English	Official report	NA	Yes	Plantae	Tracheophyta	Liliopsida	Commelinales	Pontederiaceae	Eichhornia	Eichhornia crassipes	NA	Water hyacinth	Aquatic	aquatic	N	NA	NA	N	Africa	South Africa	NA	South Africa	Site	2006	Period	2006	2006	2006	2006	One-time	400	NA	NA	486.368	913.734	400	486.368	913.734	USD	2006	Effective
234	SC143	NA	Wise2012	Costs, benefits and management options for an invasive alien tree species: The case of mesquite in the Northern Cape, South Africa	Wise, R.M., van Wilgen, B.W., Le Maitre, D. C.	Mesquite (Prosopis species) were introduced to South Africa to provide fodder and shade for livestock, but some have become invasive, impacting on water and grazing resources. Mesquiteâ€™s net economic effects are unclear and their unequal distribution leads to conflict. We estimated the value of mesquite invasions in the Northern Cape Province for different scenarios, differentiating between pro…	2012	English	Peer-reviewed article	Department of Water Affairs and Forestry, 2008. Working for Water Information Management System (WIMS) e 2001 to 2006 Data for All Prosopis Operations in South Africa, Cape Town. Department of Water Affairs and Forestry (DWAF).	Yes	Plantae	Tracheophyta	Magnoliopsida	Fabales	Fabaceae	Prosopis	Prosopis sp.	NA	Mesquite	Terrestrial	terrestrial	N	NA	NA	N	Africa	South Africa	NA	Northern Cape	Unit (5117 ha)	2010-2041	Year	2010	2041	2010	2041	Potentially ongoing	402.26	NA	NA	429.462	714.961	402.26	429.462	714.961	USD	2012	Publication year
235	SC144	NA	Hosking2002	Evaluating the environmental use of water - Selected case studies in the eastern and southern cape	Hosking SG; du Preez M; Campbell E.E; Wooldrige T.H. & du Plessis L.L.	South Africa is a drought-prone, water-poor region (Burgers, Marais & Bekker 1995:101). It has a mean annual rainfall of only 502mm and a mean annual runoff of only 42mm (420m3/ha/a) and for these reasons it seems very probable that water shortages will limit economic development in South Africa during the Twenty-first century (Briers & Powell 1993:1). Consequently, it is imperative that its wate…	2002	English	Official report	Versveld1998	Yes	Plantae	Tracheophyta	Magnoliopsida	Diverse/Unspecified	Diverse/Unspecified	Diverse/Unspecified	Diverse/Unspecified	NA	Tall trees other than acacia, eucalyptus, pines and hakeas	Terrestrial	terrestrial	N	NA	NA	NA	Africa	South Africa	NA	NA	Country	Approximatelly 2007	Year	2007	2007	2007	2007	Potentially ongoing	413	NA	NA	112.338	255.764	413	112.338	255.764	ZAR	1998	Publication year
236	SC147	NA	Macdonall&Wissel1992	Determining optimal clearing treatments for the alien invasive shrub Acacia saligna in the southwestern Cape, South Africa	Macdonald, I.A.W., Wissel, C.	The results of a replicated field-scale trial of a range of control treatments for Acacia saligna were used to create a probabilistic model of the effects of repeated treatment applications. Using estimates of costs per plant treated for each treatment and for each of four size classes of plants, it was possible to compute the costs for every treatment combination. A Markov-chain model was create…	1992	English	Peer-reviewed article	Macdonall&Wissel1989	Yes	Plantae	Tracheophyta	Magnoliopsida	Fabales	Fabaceae	Acacia	Acacia saligna	NA	Port Jackson willow	Terrestrial	terrestrial	N	Fynbos	3	N	Africa	South Africa	NA	Southwestern Cape	Site	1992-1996	Period	1992	1996	1992	1996	Potentially ongoing	428	NA	NA	684.545	1597.93	85.6	136.909	319.587	ZAR	1984	Effective
237	SC148	NA	Hosking2002	Evaluating the environmental use of water - Selected case studies in the eastern and southern cape	Hosking SG; du Preez M; Campbell E.E; Wooldrige T.H. & du Plessis L.L.	South Africa is a drought-prone, water-poor region (Burgers, Marais & Bekker 1995:101). It has a mean annual rainfall of only 502mm and a mean annual runoff of only 42mm (420m3/ha/a) and for these reasons it seems very probable that water shortages will limit economic development in South Africa during the Twenty-first century (Briers & Powell 1993:1). Consequently, it is imperative that its wate…	2002	English	Official report	Versveld1998	Yes	Plantae	Tracheophyta	Magnoliopsida	Fabales	Fabaceae	Acacia	Acacia sp.	NA	Acacia	Terrestrial	terrestrial	N	NA	NA	NA	Africa	South Africa	NA	NA	Country	Approximatelly 2000	Year	2000	2000	2000	2000	Potentially ongoing	428	NA	NA	116.418	265.053	428	116.418	265.053	ZAR	1998	Publication year
238	SC149	NA	Hosking2002	Evaluating the environmental use of water - Selected case studies in the eastern and southern cape	Hosking SG; du Preez M; Campbell E.E; Wooldrige T.H. & du Plessis L.L.	South Africa is a drought-prone, water-poor region (Burgers, Marais & Bekker 1995:101). It has a mean annual rainfall of only 502mm and a mean annual runoff of only 42mm (420m3/ha/a) and for these reasons it seems very probable that water shortages will limit economic development in South Africa during the Twenty-first century (Briers & Powell 1993:1). Consequently, it is imperative that its wate…	2002	English	Official report	Versveld1998	Yes	Plantae	Tracheophyta	Magnoliopsida	Myrtales	Myrtaceae	Eucalyptus	Eucalyptus sp.	NA	Eucalyptus	Terrestrial	terrestrial	N	NA	NA	NA	Africa	South Africa	NA	NA	Country	Approximatelly 2002	Year	2002	2002	2002	2002	Potentially ongoing	429	NA	NA	116.69	265.673	429	116.69	265.673	ZAR	1998	Publication year
239	SC151	NA	Hosking2002	Evaluating the environmental use of water - Selected case studies in the eastern and southern cape	Hosking SG; du Preez M; Campbell E.E; Wooldrige T.H. & du Plessis L.L.	South Africa is a drought-prone, water-poor region (Burgers, Marais & Bekker 1995:101). It has a mean annual rainfall of only 502mm and a mean annual runoff of only 42mm (420m3/ha/a) and for these reasons it seems very probable that water shortages will limit economic development in South Africa during the Twenty-first century (Briers & Powell 1993:1). Consequently, it is imperative that its wate…	2002	English	Official report	Versveld1998	Yes	Plantae	Tracheophyta	Magnoliopsida	Myrtales	Myrtaceae	Eucalyptus	Eucalyptus sp.	NA	Eucalyptus	Terrestrial	terrestrial	N	NA	NA	NA	Africa	South Africa	NA	NA	Country	Approximatelly 2003	Year	2003	2003	2003	2003	Potentially ongoing	441	NA	NA	119.954	273.104	441	119.954	273.104	ZAR	1998	Publication year
240	SC152	NA	Hosking2002	Evaluating the environmental use of water - Selected case studies in the eastern and southern cape	Hosking SG; du Preez M; Campbell E.E; Wooldrige T.H. & du Plessis L.L.	South Africa is a drought-prone, water-poor region (Burgers, Marais & Bekker 1995:101). It has a mean annual rainfall of only 502mm and a mean annual runoff of only 42mm (420m3/ha/a) and for these reasons it seems very probable that water shortages will limit economic development in South Africa during the Twenty-first century (Briers & Powell 1993:1). Consequently, it is imperative that its wate…	2002	English	Official report	Versveld1998	Yes	Plantae	Tracheophyta	Magnoliopsida	Diverse/Unspecified	Diverse/Unspecified	Diverse/Unspecified	Diverse/Unspecified	NA	Tall shrubs and other alien species	Terrestrial	terrestrial	N	NA	NA	NA	Africa	South Africa	NA	NA	Country	Approximatelly 2010	Year	2010	2010	2010	2010	Potentially ongoing	456	NA	NA	124.035	282.393	456	124.035	282.393	ZAR	1998	Publication year
241	SC153	NA	Hosking2002	Evaluating the environmental use of water - Selected case studies in the eastern and southern cape	Hosking SG; du Preez M; Campbell E.E; Wooldrige T.H. & du Plessis L.L.	South Africa is a drought-prone, water-poor region (Burgers, Marais & Bekker 1995:101). It has a mean annual rainfall of only 502mm and a mean annual runoff of only 42mm (420m3/ha/a) and for these reasons it seems very probable that water shortages will limit economic development in South Africa during the Twenty-first century (Briers & Powell 1993:1). Consequently, it is imperative that its wate…	2002	English	Official report	Versveld1998	Yes	Plantae	Tracheophyta	Magnoliopsida	Fabales	Fabaceae	Acacia	Acacia sp.	NA	Acacia	Terrestrial	terrestrial	N	NA	NA	NA	Africa	South Africa	NA	NA	Country	Approximatelly 1998	Year	1998	1998	1998	1998	Potentially ongoing	486	NA	NA	132.195	300.972	486	132.195	300.972	ZAR	1998	Publication year
242	SC158	NA	Hosking2002	Evaluating the environmental use of water - Selected case studies in the eastern and southern cape	Hosking SG; du Preez M; Campbell E.E; Wooldrige T.H. & du Plessis L.L.	South Africa is a drought-prone, water-poor region (Burgers, Marais & Bekker 1995:101). It has a mean annual rainfall of only 502mm and a mean annual runoff of only 42mm (420m3/ha/a) and for these reasons it seems very probable that water shortages will limit economic development in South Africa during the Twenty-first century (Briers & Powell 1993:1). Consequently, it is imperative that its wate…	2002	English	Official report	Versveld1998	Yes	Plantae	Tracheophyta	Magnoliopsida	Diverse/Unspecified	Diverse/Unspecified	Diverse/Unspecified	Diverse/Unspecified	NA	Pines and hakeas	Terrestrial	terrestrial	N	NA	NA	NA	Africa	South Africa	NA	NA	Country	Approximatelly 2005	Year	2005	2005	2005	2005	Potentially ongoing	512	NA	NA	139.267	317.073	512	139.267	317.073	ZAR	1998	Publication year
244	SC160	NA	Hosking2002	Evaluating the environmental use of water - Selected case studies in the eastern and southern cape	Hosking SG; du Preez M; Campbell E.E; Wooldrige T.H. & du Plessis L.L.	South Africa is a drought-prone, water-poor region (Burgers, Marais & Bekker 1995:101). It has a mean annual rainfall of only 502mm and a mean annual runoff of only 42mm (420m3/ha/a) and for these reasons it seems very probable that water shortages will limit economic development in South Africa during the Twenty-first century (Briers & Powell 1993:1). Consequently, it is imperative that its wate…	2002	English	Official report	Versveld1998	Yes	Plantae	Tracheophyta	Magnoliopsida	Myrtales	Myrtaceae	Eucalyptus	Eucalyptus sp.	NA	Eucalyptus	Terrestrial	terrestrial	N	NA	NA	NA	Africa	South Africa	NA	NA	Country	Approximatelly 2001	Year	2001	2001	2001	2001	Potentially ongoing	525	NA	NA	142.803	325.124	525	142.803	325.124	ZAR	1998	Publication year
245	SC162	TC	EMTC_18	South African experience regarding alien species: impacts and control	Huntley et al	NA	1996	English	Book chapter	NA	Yes	Animalia	Chordata	Mammalia	Carnivora	Felidae	Felis	Felis domesticus	NA	NA	Terrestrial	terrestrial	N	NA	NA	N	Africa	South Africa	NA	Marion Island	Country	1986-1987	Year	1986	1987	1986	1987	One-time	534	NA	NA	194.103	388.874	534	194.103	388.874	ZAR	1996	Effective
246	SC163	NA	Macdonall&Wissel1992	Determining optimal clearing treatments for the alien invasive shrub Acacia saligna in the southwestern Cape, South Africa	Macdonald, I.A.W., Wissel, C.	The results of a replicated field-scale trial of a range of control treatments for Acacia saligna were used to create a probabilistic model of the effects of repeated treatment applications. Using estimates of costs per plant treated for each treatment and for each of four size classes of plants, it was possible to compute the costs for every treatment combination. A Markov-chain model was create…	1992	English	Peer-reviewed article	Macdonall&Wissel1989	Yes	Plantae	Tracheophyta	Magnoliopsida	Fabales	Fabaceae	Acacia	Acacia saligna	NA	Port Jackson willow	Terrestrial	terrestrial	N	Fynbos	3	N	Africa	South Africa	NA	Southwestern Cape	Site	1992-1996	Period	1992	1996	1992	1996	Potentially ongoing	539	NA	NA	862.079	2012.35	107.8	172.416	402.47	ZAR	1984	Effective
247	SC164	NA	Macdonall&Wissel1992	Determining optimal clearing treatments for the alien invasive shrub Acacia saligna in the southwestern Cape, South Africa	Macdonald, I.A.W., Wissel, C.	The results of a replicated field-scale trial of a range of control treatments for Acacia saligna were used to create a probabilistic model of the effects of repeated treatment applications. Using estimates of costs per plant treated for each treatment and for each of four size classes of plants, it was possible to compute the costs for every treatment combination. A Markov-chain model was create…	1992	English	Peer-reviewed article	Macdonall&Wissel1989	Yes	Plantae	Tracheophyta	Magnoliopsida	Fabales	Fabaceae	Acacia	Acacia saligna	NA	Port Jackson willow	Terrestrial	terrestrial	N	Fynbos	3	N	Africa	South Africa	NA	Southwestern Cape	Site	1992-1996	Period	1992	1996	1992	1996	Potentially ongoing	540	NA	NA	863.679	2016.08	108	172.736	403.217	ZAR	1984	Effective
248	SC165	NA	Macdonall&Wissel1992	Determining optimal clearing treatments for the alien invasive shrub Acacia saligna in the southwestern Cape, South Africa	Macdonald, I.A.W., Wissel, C.	The results of a replicated field-scale trial of a range of control treatments for Acacia saligna were used to create a probabilistic model of the effects of repeated treatment applications. Using estimates of costs per plant treated for each treatment and for each of four size classes of plants, it was possible to compute the costs for every treatment combination. A Markov-chain model was create…	1992	English	Peer-reviewed article	Macdonall&Wissel1989	Yes	Plantae	Tracheophyta	Magnoliopsida	Fabales	Fabaceae	Acacia	Acacia saligna	NA	Port Jackson willow	Terrestrial	terrestrial	N	Fynbos	3	N	Africa	South Africa	NA	Southwestern Cape	Site	1992-1996	Period	1992	1996	1992	1996	Potentially ongoing	549	NA	NA	878.073	2049.69	109.8	175.615	409.937	ZAR	1984	Effective
249	SC166	NA	Nielsen2005	Efficacy and costs of handheld sprayers in the subhumid savanna for cogongrass control	Nielsen OK Chikoye D Streibig JC	Cogongrass continues to be one of the most invasive weeds in the subhumid savanna. Herbicide application expenses depend on equipment costs, costs of water transport for spraying, and chemical costs. In three on-farm experiments on land heavily infested with cogongrass, the effectiveness of a knapsack sprayer (KS), a very low volume sprayer (VLV), and a rope wick (RW) applicator was tested at Ija…	2005	English	Peer-reviewed article	NA	Yes	Plantae	Tracheophyta	Liliopsida	Cyperales	Poaceae	Imperata	Imperata cylindrica	NA	Cogongrass	Terrestrial	terrestrial	N	sub-humid savanna	4	N	Africa	Nigeria	NA	Ijaye	Site	2000-2001	Period	2000	2001	2000	2001	Potentially ongoing	557.4	NA	NA	742.721	2931.79	278.7	371.36	1465.89	USD	2003	Effective
250	SC168	NA	Hosking2002	Evaluating the environmental use of water - Selected case studies in the eastern and southern cape	Hosking SG; du Preez M; Campbell E.E; Wooldrige T.H. & du Plessis L.L.	South Africa is a drought-prone, water-poor region (Burgers, Marais & Bekker 1995:101). It has a mean annual rainfall of only 502mm and a mean annual runoff of only 42mm (420m3/ha/a) and for these reasons it seems very probable that water shortages will limit economic development in South Africa during the Twenty-first century (Briers & Powell 1993:1). Consequently, it is imperative that its wate…	2002	English	Official report	Versveld1998	Yes	Plantae	Tracheophyta	Magnoliopsida	Diverse/Unspecified	Diverse/Unspecified	Diverse/Unspecified	Diverse/Unspecified	NA	Tall shrubs and other alien species	Terrestrial	terrestrial	N	NA	NA	NA	Africa	South Africa	NA	NA	Country	Approximatelly 2010	Year	2010	2010	2010	2010	Potentially ongoing	582	NA	NA	158.307	360.423	582	158.307	360.423	ZAR	1998	Publication year
251	SC169	NA	Hosking2002	Evaluating the environmental use of water - Selected case studies in the eastern and southern cape	Hosking SG; du Preez M; Campbell E.E; Wooldrige T.H. & du Plessis L.L.	South Africa is a drought-prone, water-poor region (Burgers, Marais & Bekker 1995:101). It has a mean annual rainfall of only 502mm and a mean annual runoff of only 42mm (420m3/ha/a) and for these reasons it seems very probable that water shortages will limit economic development in South Africa during the Twenty-first century (Briers & Powell 1993:1). Consequently, it is imperative that its wate…	2002	English	Official report	Versveld1998	Yes	Plantae	Tracheophyta	Magnoliopsida	Diverse/Unspecified	Diverse/Unspecified	Diverse/Unspecified	Diverse/Unspecified	NA	Pines and hakeas	Terrestrial	terrestrial	N	NA	NA	NA	Africa	South Africa	NA	NA	Country	Approximatelly 2004	Year	2004	2004	2004	2004	Potentially ongoing	585	NA	NA	159.123	362.281	585	159.123	362.281	ZAR	1998	Publication year
252	SC170	NA	Hosking2002	Evaluating the environmental use of water - Selected case studies in the eastern and southern cape	Hosking SG; du Preez M; Campbell E.E; Wooldrige T.H. & du Plessis L.L.	South Africa is a drought-prone, water-poor region (Burgers, Marais & Bekker 1995:101). It has a mean annual rainfall of only 502mm and a mean annual runoff of only 42mm (420m3/ha/a) and for these reasons it seems very probable that water shortages will limit economic development in South Africa during the Twenty-first century (Briers & Powell 1993:1). Consequently, it is imperative that its wate…	2002	English	Official report	Versveld1998	Yes	Plantae	Tracheophyta	Magnoliopsida	Diverse/Unspecified	Diverse/Unspecified	Diverse/Unspecified	Diverse/Unspecified	NA	Tall trees other than acacia, eucalyptus, pines and hakeas	Terrestrial	terrestrial	N	NA	NA	NA	Africa	South Africa	NA	NA	Country	Approximatelly 2009	Year	2009	2009	2009	2009	Potentially ongoing	594	NA	NA	161.571	367.854	594	161.571	367.854	ZAR	1998	Publication year
253	SC174	NA	Macdonall&Wissel1992	Determining optimal clearing treatments for the alien invasive shrub Acacia saligna in the southwestern Cape, South Africa	Macdonald, I.A.W., Wissel, C.	The results of a replicated field-scale trial of a range of control treatments for Acacia saligna were used to create a probabilistic model of the effects of repeated treatment applications. Using estimates of costs per plant treated for each treatment and for each of four size classes of plants, it was possible to compute the costs for every treatment combination. A Markov-chain model was create…	1992	English	Peer-reviewed article	Macdonall&Wissel1989	Yes	Plantae	Tracheophyta	Magnoliopsida	Fabales	Fabaceae	Acacia	Acacia saligna	NA	Port Jackson willow	Terrestrial	terrestrial	N	Fynbos	3	N	Africa	South Africa	NA	Southwestern Cape	Site	1992-1996	Period	1992	1996	1992	1996	Potentially ongoing	604	NA	NA	966.041	2255.03	120.8	193.208	451.006	ZAR	1984	Effective
254	SC175	NA	Hosking1999	A cost-benefit analysis of removing alien trees in the Tsitsikamma mountain catchment	Hosking, S.G. and du Preez, M.	The removal of water-consuming alien vegetation and restoration of low water-consumlng indigenous vegetation, the Working for Water Programme, is the biggest conservation project In terms of manpower use currently being undertaken In South Africa. During 1998 about 40 000 jobs were created in It. The economic case for the programme in selected mountain catchments in the Western Cape has already b…	1999	English	Peer-reviewed article	NA	Yes	Plantae	Tracheophyta	Magnoliopsida	Fabales	Fabaceae	Acacia	Acacia mearnsii	NA	Black wattle	Terrestrial	terrestrial	N	NA	NA	N	Africa	South Africa	NA	Tsitsikamma	Unit (~29 600 ha)	1995	Year	1995	2030	1995	2030	Potentially ongoing	606	NA	NA	145.961	348.088	606	145.961	348.088	ZAR	1999	Publication year
255	SC176	NA	Macdonall&Wissel1992	Determining optimal clearing treatments for the alien invasive shrub Acacia saligna in the southwestern Cape, South Africa	Macdonald, I.A.W., Wissel, C.	The results of a replicated field-scale trial of a range of control treatments for Acacia saligna were used to create a probabilistic model of the effects of repeated treatment applications. Using estimates of costs per plant treated for each treatment and for each of four size classes of plants, it was possible to compute the costs for every treatment combination. A Markov-chain model was create…	1992	English	Peer-reviewed article	Macdonall&Wissel1989	Yes	Plantae	Tracheophyta	Magnoliopsida	Fabales	Fabaceae	Acacia	Acacia saligna	NA	Port Jackson willow	Terrestrial	terrestrial	N	Fynbos	3	N	Africa	South Africa	NA	Southwestern Cape	Site	1992-1996	Period	1992	1996	1992	1996	Potentially ongoing	650	NA	NA	1039.61	2426.77	130	207.923	485.354	ZAR	1984	Effective
256	SC178	NA	Macdonall&Wissel1992	Determining optimal clearing treatments for the alien invasive shrub Acacia saligna in the southwestern Cape, South Africa	Macdonald, I.A.W., Wissel, C.	The results of a replicated field-scale trial of a range of control treatments for Acacia saligna were used to create a probabilistic model of the effects of repeated treatment applications. Using estimates of costs per plant treated for each treatment and for each of four size classes of plants, it was possible to compute the costs for every treatment combination. A Markov-chain model was create…	1992	English	Peer-reviewed article	Macdonall&Wissel1989	Yes	Plantae	Tracheophyta	Magnoliopsida	Fabales	Fabaceae	Acacia	Acacia saligna	NA	Port Jackson willow	Terrestrial	terrestrial	N	Fynbos	3	N	Africa	South Africa	NA	Southwestern Cape	Site	1992-1996	Period	1992	1996	1992	1996	Potentially ongoing	656	NA	NA	1049.21	2449.17	131.2	209.842	489.834	ZAR	1984	Effective
257	SC179	TC	EMTC_16	Alien Invading Plants and Water Resources in South Africa. A Preliminary Assessment.	Versfeld et al	NA	1998	English	Book	NA	Yes	Plantae	Diverse/Unspecified	Diverse/Unspecified	Diverse/Unspecified	Diverse/Unspecified	Diverse/Unspecified	Diverse/Unspecified	NA	NA	Diverse/Unspecified	diverse/Unspecified	N	NA	NA	N	Africa	South Africa	NA	South Africa	Unit(ha)	1997	Year	1997	1997	1997	1997	One-time	690	NA	NA	228.664	462.524	690	228.664	462.524	ZAR	1997	Effective
258	SC181	NA	Hosking2002	Evaluating the environmental use of water - Selected case studies in the eastern and southern cape	Hosking SG; du Preez M; Campbell E.E; Wooldrige T.H. & du Plessis L.L.	South Africa is a drought-prone, water-poor region (Burgers, Marais & Bekker 1995:101). It has a mean annual rainfall of only 502mm and a mean annual runoff of only 42mm (420m3/ha/a) and for these reasons it seems very probable that water shortages will limit economic development in South Africa during the Twenty-first century (Briers & Powell 1993:1). Consequently, it is imperative that its wate…	2002	English	Official report	Versveld1998	Yes	Plantae	Tracheophyta	Magnoliopsida	Fabales	Fabaceae	Acacia	Acacia sp.	NA	Acacia	Terrestrial	terrestrial	N	NA	NA	NA	Africa	South Africa	NA	NA	Country	Approximatelly 2000	Year	2000	2000	2000	2000	Potentially ongoing	694	NA	NA	188.772	429.783	694	188.772	429.783	ZAR	1998	Publication year
259	SC182	TC	EMTC_15	Costs and benefits of biological control of invasive alien plants: case studies from South Africa	Van Wilgen et al	NA	2004	English	Peer-reviewed article	NA	Yes	Plantae	Tracheophyta	Magnoliopsida	Lamiales	Verbenaceae	Lantana	Lantana camara	NA	NA	Terrestrial	terrestrial	N	NA	NA	N	Africa	South Africa	NA	South Africa	Unit (ha)	2000	Year	2000	2000	2000	2000	One-time	710	NA	NA	145.631	370.714	710	145.631	370.714	ZAR	2000	Effective
260	SC184	NA	Hosking2002	Evaluating the environmental use of water - Selected case studies in the eastern and southern cape	Hosking SG; du Preez M; Campbell E.E; Wooldrige T.H. & du Plessis L.L.	South Africa is a drought-prone, water-poor region (Burgers, Marais & Bekker 1995:101). It has a mean annual rainfall of only 502mm and a mean annual runoff of only 42mm (420m3/ha/a) and for these reasons it seems very probable that water shortages will limit economic development in South Africa during the Twenty-first century (Briers & Powell 1993:1). Consequently, it is imperative that its wate…	2002	English	Official report	Versveld1998	Yes	Plantae	Tracheophyta	Magnoliopsida	Fabales	Fabaceae	Acacia	Acacia sp.	NA	Acacia	Terrestrial	terrestrial	N	NA	NA	NA	Africa	South Africa	NA	NA	Country	Approximatelly 1999	Year	1999	1999	1999	1999	Potentially ongoing	746	NA	NA	202.916	461.986	746	202.916	461.986	ZAR	1998	Publication year
261	SC185	NA	Gaertner2012	Plant invasions, restoration, and economics: Perspectives from South African fynbos	Gaertner, M., Nottebrock, H., Fourie, H., Privett, S.D., and Richardson, D.M.	Restoration is gaining importance in the management of plant invasions. As the success of restoration projects is frequently determined by factors other than ecological ones, we explored the ecological and financial feasibility of active restoration on three different invaded sites in South Africaâ€™s Cape Floristic Region. The aim of our study was to identify cost-effective ways of restoring fun…	2012	English	Peer-reviewed article	NA	Yes	Plantae	Tracheophyta	Magnoliopsida	Fabales	Fabaceae	Acacia	Acacia sp.	NA	Wattles	Terrestrial	terrestrial	N	NA	NA	N	Africa	South Africa	NA	Agulhas Plain	Unit (4950 m2)	2007-2010	Period	2007	2010	2007	2010	One-time	764	NA	NA	99.3504	165.397	191	24.8376	41.3492	ZAR	2012	Effective
262	SC186	NA	Wise2007	The Economic Impact and Appropriate Management of Selected Invasive Alien Species on the African Continent	Wise, R.M., van Wilgen, B.W., Hill, M.P., Schulthess, F., Tweddle, D., Chabi-Olay, A. and Zimmermann, H.G.	This report provides case studies of the economic impact of five invasive alien species in different areas in Africa. The overall aim of this work was to provide detailed information to administrators and managers. The species were: â€¢ Nile tilapia (Oreochromis niloticus); â€¢ Water hyacinth (Eichhornia crassipes); â€¢ The larger grain borer (Prostephanus truncatus); â€¢ Parthenium weed (Parthen…	2007	English	Official report	NA	Yes	Plantae	Tracheophyta	Magnoliopsida	Asterales	Asteraceae	Chromolaena	Chromolaena odorata	NA	Triffid weed	Terrestrial	terrestrial	N	NA	NA	N	Africa	South Africa	NA	South Africa	Site	2006	Period	2006	2006	2006	2006	One-time	770	NA	NA	936.259	1758.94	770	936.259	1758.94	USD	2006	Effective
263	SC188	NA	Hosking2002	Evaluating the environmental use of water - Selected case studies in the eastern and southern cape	Hosking SG; du Preez M; Campbell E.E; Wooldrige T.H. & du Plessis L.L.	South Africa is a drought-prone, water-poor region (Burgers, Marais & Bekker 1995:101). It has a mean annual rainfall of only 502mm and a mean annual runoff of only 42mm (420m3/ha/a) and for these reasons it seems very probable that water shortages will limit economic development in South Africa during the Twenty-first century (Briers & Powell 1993:1). Consequently, it is imperative that its wate…	2002	English	Official report	Versveld1998	Yes	Plantae	Tracheophyta	Magnoliopsida	Myrtales	Myrtaceae	Eucalyptus	Eucalyptus sp.	NA	Eucalyptus	Terrestrial	terrestrial	N	NA	NA	NA	Africa	South Africa	NA	NA	Country	Approximatelly 2002	Year	2002	2002	2002	2002	Potentially ongoing	802	NA	NA	218.148	496.665	802	218.148	496.665	ZAR	1998	Publication year
264	SC189	NA	Macdonall&Wissel1992	Determining optimal clearing treatments for the alien invasive shrub Acacia saligna in the southwestern Cape, South Africa	Macdonald, I.A.W., Wissel, C.	The results of a replicated field-scale trial of a range of control treatments for Acacia saligna were used to create a probabilistic model of the effects of repeated treatment applications. Using estimates of costs per plant treated for each treatment and for each of four size classes of plants, it was possible to compute the costs for every treatment combination. A Markov-chain model was create…	1992	English	Peer-reviewed article	Macdonall&Wissel1989	Yes	Plantae	Tracheophyta	Magnoliopsida	Fabales	Fabaceae	Acacia	Acacia saligna	NA	Port Jackson willow	Terrestrial	terrestrial	N	Fynbos	3	N	Africa	South Africa	NA	Southwestern Cape	Site	1992-1996	Period	1992	1996	1992	1996	Potentially ongoing	806	NA	NA	1289.12	3009.19	161.2	257.824	601.839	ZAR	1984	Effective
265	SC190	NA	Hosking2002	Evaluating the environmental use of water - Selected case studies in the eastern and southern cape	Hosking SG; du Preez M; Campbell E.E; Wooldrige T.H. & du Plessis L.L.	South Africa is a drought-prone, water-poor region (Burgers, Marais & Bekker 1995:101). It has a mean annual rainfall of only 502mm and a mean annual runoff of only 42mm (420m3/ha/a) and for these reasons it seems very probable that water shortages will limit economic development in South Africa during the Twenty-first century (Briers & Powell 1993:1). Consequently, it is imperative that its wate…	2002	English	Official report	Versveld1998	Yes	Plantae	Tracheophyta	Magnoliopsida	Diverse/Unspecified	Diverse/Unspecified	Diverse/Unspecified	Diverse/Unspecified	NA	Pines and hakeas	Terrestrial	terrestrial	N	NA	NA	NA	Africa	South Africa	NA	NA	Country	Approximatelly 2005	Year	2005	2005	2005	2005	Potentially ongoing	818	NA	NA	222.501	506.574	818	222.501	506.574	ZAR	1998	Publication year
266	SC191	NA	Macdonall&Wissel1992	Determining optimal clearing treatments for the alien invasive shrub Acacia saligna in the southwestern Cape, South Africa	Macdonald, I.A.W., Wissel, C.	The results of a replicated field-scale trial of a range of control treatments for Acacia saligna were used to create a probabilistic model of the effects of repeated treatment applications. Using estimates of costs per plant treated for each treatment and for each of four size classes of plants, it was possible to compute the costs for every treatment combination. A Markov-chain model was create…	1992	English	Peer-reviewed article	Macdonall&Wissel1989	Yes	Plantae	Tracheophyta	Magnoliopsida	Fabales	Fabaceae	Acacia	Acacia saligna	NA	Port Jackson willow	Terrestrial	terrestrial	N	Fynbos	3	N	Africa	South Africa	NA	Southwestern Cape	Site	1992-1996	Period	1992	1996	1992	1996	Potentially ongoing	826	NA	NA	1321.11	3083.86	165.2	264.222	616.773	ZAR	1984	Effective
268	SC194	NA	Borrel2011	Chemical control of invasive Psidium guajava in Swaziland: A preliminary assessment of costs and efficacy	Borrel, A.J., Brown, L.R., Slater, K.	Psidium guajava (guava) is recognised as the third most important invasive alien plant species in the moist savanna biome of South Africa, Lesotho and Swaziland. The cost of initial clearing of alien plants reaches up to R3 000-00 per ha, therefore the application of correct control methods is essential for cost-effective reduction of the spread. The aim of this study was to test the cost effecti…	2011	English	Peer-reviewed article	NA	Yes	Plantae	Tracheophyta	Magnoliopsida	Myrtales	Myrtaceae	Psidium	Psidium guajava	NA	Guava	Terrestrial	terrestrial	N	NA	4	Y	Africa	Swaziland	NA	Upper Middleveld	Unit (1 ha)	2008-2009	Year	2008	2009	2008	2009	One-time	897	NA	NA	123.617	300.222	897	123.617	300.222	ZAR	2005	Effective
269	SC195	NA	Macdonall&Wissel1992	Determining optimal clearing treatments for the alien invasive shrub Acacia saligna in the southwestern Cape, South Africa	Macdonald, I.A.W., Wissel, C.	The results of a replicated field-scale trial of a range of control treatments for Acacia saligna were used to create a probabilistic model of the effects of repeated treatment applications. Using estimates of costs per plant treated for each treatment and for each of four size classes of plants, it was possible to compute the costs for every treatment combination. A Markov-chain model was create…	1992	English	Peer-reviewed article	Macdonall&Wissel1989	Yes	Plantae	Tracheophyta	Magnoliopsida	Fabales	Fabaceae	Acacia	Acacia saligna	NA	Port Jackson willow	Terrestrial	terrestrial	N	Fynbos	3	N	Africa	South Africa	NA	Southwestern Cape	Site	1992-1996	Period	1992	1996	1992	1996	Potentially ongoing	934	NA	NA	1493.84	3487.08	186.8	298.769	697.416	ZAR	1996	Effective
270	SC197	NA	Hosking2002	Evaluating the environmental use of water - Selected case studies in the eastern and southern cape	Hosking SG; du Preez M; Campbell E.E; Wooldrige T.H. & du Plessis L.L.	South Africa is a drought-prone, water-poor region (Burgers, Marais & Bekker 1995:101). It has a mean annual rainfall of only 502mm and a mean annual runoff of only 42mm (420m3/ha/a) and for these reasons it seems very probable that water shortages will limit economic development in South Africa during the Twenty-first century (Briers & Powell 1993:1). Consequently, it is imperative that its wate…	2002	English	Official report	Versveld1998	Yes	Plantae	Tracheophyta	Magnoliopsida	Diverse/Unspecified	Diverse/Unspecified	Diverse/Unspecified	Diverse/Unspecified	NA	Tall trees other than acacia, eucalyptus, pines and hakeas	Terrestrial	terrestrial	N	NA	NA	NA	Africa	South Africa	NA	NA	Country	Approximatelly 2009	Year	2009	2009	2009	2009	Potentially ongoing	969	NA	NA	263.573	600.086	969	263.573	600.086	ZAR	1998	Publication year
271	SC198	NA	Borrel2011	Chemical control of invasive Psidium guajava in Swaziland: A preliminary assessment of costs and efficacy	Borrel, A.J., Brown, L.R., Slater, K.	Psidium guajava (guava) is recognised as the third most important invasive alien plant species in the moist savanna biome of South Africa, Lesotho and Swaziland. The cost of initial clearing of alien plants reaches up to R3 000-00 per ha, therefore the application of correct control methods is essential for cost-effective reduction of the spread. The aim of this study was to test the cost effecti…	2011	English	Peer-reviewed article	NA	Yes	Plantae	Tracheophyta	Magnoliopsida	Myrtales	Myrtaceae	Psidium	Psidium guajava	NA	Guava	Terrestrial	terrestrial	N	NA	4	Y	Africa	Swaziland	NA	Upper Middleveld	Unit (1 ha)	2008-2009	Year	2008	2009	2008	2009	One-time	978	NA	NA	134.779	327.333	978	134.779	327.333	ZAR	2008	Effective
273	SC209	NA	Leavold2007	Development of case studies on the economic impacts of invasive species in Africa: Salvinia molesta	Leavold, V. Lloyd, L. and Lepetit, J.	This report details the results of an extensive desktop study to quantify the economic impacts of an invasive weed species in Africa. Salvinia molesta (Salvinia) is a floating water weed found in the lower Senegal River delta in Senegal. Salvinia reproduces vegetatively, is easily spread by flowing water as well as by stock, vehicles and water craft. The plant forms a thick mat on the waterâ€™s s…	2007	English	Peer-reviewed article	Pieterse et al. 2003	Yes	Plantae	Tracheophyta	Polypodiopsida	Salviniales	Salviniaceae	Salvinia	Salvinia molesta	NA	Kariba weed	Aquatic	aquatic	N	NA	NA	N	Africa	Senegal	NA	Senegal	Country	2000	Period	2000	2000	2000	2000	One-time	1000	NA	NA	1423.46	4529.38	1000	1423.46	4529.38	USD	2000	Effective
274	SC210	NA	Leavold2007	Development of case studies on the economic impacts of invasive species in Africa: Salvinia molesta	Leavold, V. Lloyd, L. and Lepetit, J.	This report details the results of an extensive desktop study to quantify the economic impacts of an invasive weed species in Africa. Salvinia molesta (Salvinia) is a floating water weed found in the lower Senegal River delta in Senegal. Salvinia reproduces vegetatively, is easily spread by flowing water as well as by stock, vehicles and water craft. The plant forms a thick mat on the waterâ€™s s…	2007	English	Peer-reviewed article	Pieterse et al. 2003	Yes	Plantae	Tracheophyta	Polypodiopsida	Salviniales	Salviniaceae	Salvinia	Salvinia molesta	NA	Kariba weed	Aquatic	aquatic	N	NA	NA	N	Africa	Senegal/Mauritania	NA	Senegal/Mauritania	Unit (70km)	2000	Period	2000	2000	2000	2000	One-time	1000	NA	NA	1423.46	NA	1000	1423.46	NA	USD	2000	Effective
275	SC211	NA	Vogele1991	Biological control of the fruit tree mealybugÂ Rastrococcus invadensÂ Williams in Togo: A preliminary sociological and economic evaluation	VÃ¶gele, J.M., Agounke, D., Moore, D.	The fruit tree mealybugÂ Rastrococcus invadensÂ Williams, accidentally introduced into the West African region in the early 1980s, has been the subject of a successful biological control programme in Togo and elsewhere in West Africa. It is now kept at low population densities by the introduced specific parasitoidÂ Gyranusoidea tebygiÂ Noyes. The sociological and economic impact of this successfu…	1991	English	Peer-reviewed article	NA	Yes	Animalia	Arthropoda	Insecta	Hemiptera	Pseudococcidae	Rastrococcus	Rastrococcus invadens	NA	Fruit tree mealybug	Terrestrial	terrestrial	N	NA	12b	N	Africa	Togo	NA	Togo	Country	1990	Year	1991	1991	1991	1991	Potentially ongoing	1000	NA	NA	1799.81	3667.29	1000	1799.81	3667.29	USD	1991	Effective
276	SC215	TC	Anon2018	Tunisie: le crabe bleu, prÃ©dateur redoutable devenu proie prisÃ©e	Anon	[WEB PAGE TEXT] Les pÃªcheurs du sud tunisien ont surnommÃ© ce redoutable prÃ©dateur marin "Daech", en rÃ©fÃ©rence Ã l'acronyme arabe du groupe Etat islamique. Mais, dÃ©sormais, le crabe bleu est Ã son tour en train de devenir une proie. Tirant pÃ©niblement ses filets hors de l'eau, Jamel Ben Jemaa Zayoud, pÃªcheur sur l'Ã®le de Djerba (sud-est), s'Ã©nerve: "Regardez, il n'y a que des Daech, ils …	2018	French	Magazine article	NA	Yes	Animalia	Arthropoda	Malacostraca	Decapoda	Portunidae	Portunus	Portunus pelagicus	NA	blue swimming crab	Aquatic	aquatic	N	NA	11	N	Africa	Tunisia	NA	NA	Country	7 months	Year	2018	2018	2018	2018	Potentially ongoing	1015	870	1160	374.329	1357.53	1015	374.329	1357.53	TND	2018	Publication year
277	SC216	NA	McConnachie2003	Economic evaluation of the successful biological control of Azolla filiculoides in South Africa	McConnachie, A.J., de Wit, M.T., Hill, M.P., Byrne, M.J.	Azolla filiculoides (red waterfern) is a floating fern native to South America which has invaded aquatic ecosystems in South Africa. Thick mats of A. filiculoides on dams and slow-moving water bodies cause economic losses to water-users. Affected waterusers were surveyed using a questionnaire to assess the importance of the weed. Among those most seriously affected were farming (71%), recreationa…	2003	English	Peer-reviewed article	NA	Yes	Plantae	Tracheophyta	Polypodiopsida	Salviniales	Salviniaceae	Azolla	Azolla filiculoides	NA	Red water fern	Aquatic	aquatic	N	NA	11	N	Africa	South Africa	NA	South Africa	Site	2000	Year	NA	NA	2000	2000	Potentially ongoing	1038	NA	NA	1477.55	3761.21	1038	1477.55	3761.21	USD	2000	Effective
278	SC217	NA	Hosking2002	Evaluating the environmental use of water - Selected case studies in the eastern and southern cape	Hosking SG; du Preez M; Campbell E.E; Wooldrige T.H. & du Plessis L.L.	South Africa is a drought-prone, water-poor region (Burgers, Marais & Bekker 1995:101). It has a mean annual rainfall of only 502mm and a mean annual runoff of only 42mm (420m3/ha/a) and for these reasons it seems very probable that water shortages will limit economic development in South Africa during the Twenty-first century (Briers & Powell 1993:1). Consequently, it is imperative that its wate…	2002	English	Official report	Versveld1998	Yes	Plantae	Tracheophyta	Magnoliopsida	Diverse/Unspecified	Diverse/Unspecified	Diverse/Unspecified	Diverse/Unspecified	NA	Pines and hakeas	Terrestrial	terrestrial	N	NA	NA	NA	Africa	South Africa	NA	NA	Country	Approximatelly 2004	Year	2004	2004	2004	2004	Potentially ongoing	1112	NA	NA	302.47	688.643	1112	302.47	688.643	ZAR	1998	Publication year
279	SC220	NA	Hosking2002	Evaluating the environmental use of water - Selected case studies in the eastern and southern cape	Hosking SG; du Preez M; Campbell E.E; Wooldrige T.H. & du Plessis L.L.	South Africa is a drought-prone, water-poor region (Burgers, Marais & Bekker 1995:101). It has a mean annual rainfall of only 502mm and a mean annual runoff of only 42mm (420m3/ha/a) and for these reasons it seems very probable that water shortages will limit economic development in South Africa during the Twenty-first century (Briers & Powell 1993:1). Consequently, it is imperative that its wate…	2002	English	Official report	Versveld1998	Yes	Plantae	Tracheophyta	Magnoliopsida	Diverse/Unspecified	Diverse/Unspecified	Diverse/Unspecified	Diverse/Unspecified	NA	Tall trees other than acacia, eucalyptus, pines and hakeas	Terrestrial	terrestrial	N	NA	NA	NA	Africa	South Africa	NA	NA	Country	Approximatelly 2008	Year	2008	2008	2008	2008	Potentially ongoing	1206	NA	NA	328.039	746.856	1206	328.039	746.856	ZAR	1998	Publication year
280	SC224	NA	Hosking2002	Evaluating the environmental use of water - Selected case studies in the eastern and southern cape	Hosking SG; du Preez M; Campbell E.E; Wooldrige T.H. & du Plessis L.L.	South Africa is a drought-prone, water-poor region (Burgers, Marais & Bekker 1995:101). It has a mean annual rainfall of only 502mm and a mean annual runoff of only 42mm (420m3/ha/a) and for these reasons it seems very probable that water shortages will limit economic development in South Africa during the Twenty-first century (Briers & Powell 1993:1). Consequently, it is imperative that its wate…	2002	English	Official report	Versveld1998	Yes	Plantae	Tracheophyta	Magnoliopsida	Fabales	Fabaceae	Acacia	Acacia sp.	NA	Acacia	Terrestrial	terrestrial	N	NA	NA	NA	Africa	South Africa	NA	NA	Country	Approximatelly 1999	Year	1999	1999	1999	1999	Potentially ongoing	1403	NA	NA	381.624	868.855	1403	381.624	868.855	ZAR	1998	Publication year
281	SC231	NA	Hosking2002	Evaluating the environmental use of water - Selected case studies in the eastern and southern cape	Hosking SG; du Preez M; Campbell E.E; Wooldrige T.H. & du Plessis L.L.	South Africa is a drought-prone, water-poor region (Burgers, Marais & Bekker 1995:101). It has a mean annual rainfall of only 502mm and a mean annual runoff of only 42mm (420m3/ha/a) and for these reasons it seems very probable that water shortages will limit economic development in South Africa during the Twenty-first century (Briers & Powell 1993:1). Consequently, it is imperative that its wate…	2002	English	Official report	Versveld1998	Yes	Plantae	Tracheophyta	Magnoliopsida	Fabales	Fabaceae	Acacia	Acacia sp.	NA	Acacia	Terrestrial	terrestrial	N	NA	NA	NA	Africa	South Africa	NA	NA	Country	Approximatelly 1998	Year	1998	1998	1998	1998	Potentially ongoing	1505	NA	NA	409.368	932.022	1505	409.368	932.022	ZAR	1998	Publication year
282	SC232	NA	Gaertner2012	Plant invasions, restoration, and economics: Perspectives from South African fynbos	Gaertner, M., Nottebrock, H., Fourie, H., Privett, S.D., and Richardson, D.M.	Restoration is gaining importance in the management of plant invasions. As the success of restoration projects is frequently determined by factors other than ecological ones, we explored the ecological and financial feasibility of active restoration on three different invaded sites in South Africaâ€™s Cape Floristic Region. The aim of our study was to identify cost-effective ways of restoring fun…	2012	English	Peer-reviewed article	NA	Yes	Plantae	Tracheophyta	Liliopsida	Cyperales	Poaceae	Cenchrus	Cenchrus clandestinus	NA	Kikuyu grass	Terrestrial	terrestrial	N	NA	NA	N	Africa	South Africa	NA	Agulhas Plain	Unit (840 m2)	2007-2010	Period	2007	2010	2007	2010	One-time	1578	NA	NA	205.203	341.618	394.5	51.3007	85.4045	ZAR	2012	Effective
283	SC235	NA	Currie2009	Cost-benefit analysis of alien vegetation clearing for water yield and tourism in a mountain catchment in the Western Cape of South Africa	Currie B Milton SJ Steenkamp JC	Economic analysis is used to assess the costs and benefits of restoration following clearing of invasive alien trees in the floristically rich Fynbos mountainous area near Franschhoek, Western Cape of South Africa. The Groot Drakenstein, Franschhoek and Jonkershoek mountains receives more rainfall than the surrounding areas and is an important source of water for the city of Cape Town. The costs …	2009	English	Peer-reviewed article	NA	Yes	Plantae	Tracheophyta	Magnoliopsida	Diverse/Unspecified	Diverse/Unspecified	Diverse/Unspecified	Diverse/Unspecified	NA	Trees (Acacias and pines)	Terrestrial	terrestrial	N	Fynbos	3	N	Africa	South Africa	NA	Assegaaibos Mountain Catchment	Site	1996-2001	Period	1996	2001	1996	2001	One-time	1615	NA	NA	1963.71	3689.2	269.167	327.285	614.867	USD	2006	Effective
284	SC240	NA	Gaertner2012	Plant invasions, restoration, and economics: Perspectives from South African fynbos	Gaertner, M., Nottebrock, H., Fourie, H., Privett, S.D., and Richardson, D.M.	Restoration is gaining importance in the management of plant invasions. As the success of restoration projects is frequently determined by factors other than ecological ones, we explored the ecological and financial feasibility of active restoration on three different invaded sites in South Africaâ€™s Cape Floristic Region. The aim of our study was to identify cost-effective ways of restoring fun…	2012	English	Peer-reviewed article	NA	Yes	Plantae	Tracheophyta	Magnoliopsida	Fabales	Fabaceae	Acacia	Acacia sp.	NA	Wattles	Terrestrial	terrestrial	N	NA	NA	N	Africa	South Africa	NA	Agulhas Plain	Unit (4950 m2)	2007-2010	Period	2007	2010	2007	2010	One-time	1744	NA	NA	226.789	377.555	436	56.6973	94.3888	ZAR	2012	Effective
285	SC244	NA	Hosking2002	Evaluating the environmental use of water - Selected case studies in the eastern and southern cape	Hosking SG; du Preez M; Campbell E.E; Wooldrige T.H. & du Plessis L.L.	South Africa is a drought-prone, water-poor region (Burgers, Marais & Bekker 1995:101). It has a mean annual rainfall of only 502mm and a mean annual runoff of only 42mm (420m3/ha/a) and for these reasons it seems very probable that water shortages will limit economic development in South Africa during the Twenty-first century (Briers & Powell 1993:1). Consequently, it is imperative that its wate…	2002	English	Official report	Versveld1998	Yes	Plantae	Tracheophyta	Magnoliopsida	Diverse/Unspecified	Diverse/Unspecified	Diverse/Unspecified	Diverse/Unspecified	NA	Tall trees other than acacia, eucalyptus, pines and hakeas	Terrestrial	terrestrial	N	NA	NA	NA	Africa	South Africa	NA	NA	Country	Approximatelly 2007	Year	2007	2007	2007	2007	Potentially ongoing	1801	NA	NA	489.882	1115.33	1801	489.882	1115.33	ZAR	1998	Publication year
286	SC245	NA	Currie2009	Cost-benefit analysis of alien vegetation clearing for water yield and tourism in a mountain catchment in the Western Cape of South Africa	Currie B Milton SJ Steenkamp JC	Economic analysis is used to assess the costs and benefits of restoration following clearing of invasive alien trees in the floristically rich Fynbos mountainous area near Franschhoek, Western Cape of South Africa. The Groot Drakenstein, Franschhoek and Jonkershoek mountains receives more rainfall than the surrounding areas and is an important source of water for the city of Cape Town. The costs …	2009	English	Peer-reviewed article	NA	Yes	Plantae	Tracheophyta	Magnoliopsida	Diverse/Unspecified	Diverse/Unspecified	Diverse/Unspecified	Diverse/Unspecified	NA	Trees (Acacias and pines)	Terrestrial	terrestrial	N	Fynbos	3	N	Africa	South Africa	NA	Assegaaibos Mountain Catchment	Site	1996-2004	Period	1996	2004	1996	2004	One-time	1806	NA	NA	2195.95	4125.51	200.667	243.995	458.39	USD	2006	Effective
287	SC246	NA	Macdonall&Wissel1992	Determining optimal clearing treatments for the alien invasive shrub Acacia saligna in the southwestern Cape, South Africa	Macdonald, I.A.W., Wissel, C.	The results of a replicated field-scale trial of a range of control treatments for Acacia saligna were used to create a probabilistic model of the effects of repeated treatment applications. Using estimates of costs per plant treated for each treatment and for each of four size classes of plants, it was possible to compute the costs for every treatment combination. A Markov-chain model was create…	1992	English	Peer-reviewed article	Macdonall&Wissel1989	Yes	Plantae	Tracheophyta	Magnoliopsida	Fabales	Fabaceae	Acacia	Acacia saligna	NA	Port Jackson willow	Terrestrial	terrestrial	N	Fynbos	3	N	Africa	South Africa	NA	Southwestern Cape	Site	1992-1996	Period	1992	1996	1992	1996	Potentially ongoing	1817	NA	NA	2906.12	6783.75	363.4	581.224	1356.75	ZAR	1984	Effective
288	SC247	TC	EMTC_15	Costs and benefits of biological control of invasive alien plants: case studies from South Africa	Van Wilgen et al	NA	2004	English	Peer-reviewed article	NA	Yes	Plantae	Tracheophyta	Magnoliopsida	Fabales	Fabaceae	Sesbania	Sesbania punicea	NA	Red sesbania	Terrestrial	terrestrial	N	NA	NA	N	Africa	South Africa	NA	South Africa	Unit (ha)	2000	Year	2000	2000	2000	2000	One-time	1870	NA	NA	383.564	976.389	1870	383.564	976.389	ZAR	2000	Effective
289	SC249	NA	Macdonall&Wissel1992	Determining optimal clearing treatments for the alien invasive shrub Acacia saligna in the southwestern Cape, South Africa	Macdonald, I.A.W., Wissel, C.	The results of a replicated field-scale trial of a range of control treatments for Acacia saligna were used to create a probabilistic model of the effects of repeated treatment applications. Using estimates of costs per plant treated for each treatment and for each of four size classes of plants, it was possible to compute the costs for every treatment combination. A Markov-chain model was create…	1992	English	Peer-reviewed article	Macdonall&Wissel1989	Yes	Plantae	Tracheophyta	Magnoliopsida	Fabales	Fabaceae	Acacia	Acacia saligna	NA	Port Jackson willow	Terrestrial	terrestrial	N	Fynbos	3	N	Africa	South Africa	NA	Southwestern Cape	Site	1992-1996	Period	1992	1996	1992	1996	Potentially ongoing	1920	NA	NA	3070.86	7168.3	384	614.171	1433.66	ZAR	1984	Effective
290	SC251	NA	Hosking2002	Evaluating the environmental use of water - Selected case studies in the eastern and southern cape	Hosking SG; du Preez M; Campbell E.E; Wooldrige T.H. & du Plessis L.L.	South Africa is a drought-prone, water-poor region (Burgers, Marais & Bekker 1995:101). It has a mean annual rainfall of only 502mm and a mean annual runoff of only 42mm (420m3/ha/a) and for these reasons it seems very probable that water shortages will limit economic development in South Africa during the Twenty-first century (Briers & Powell 1993:1). Consequently, it is imperative that its wate…	2002	English	Official report	Versveld1998	Yes	Plantae	Tracheophyta	Magnoliopsida	Diverse/Unspecified	Diverse/Unspecified	Diverse/Unspecified	Diverse/Unspecified	NA	Tall trees other than acacia, eucalyptus, pines and hakeas	Terrestrial	terrestrial	N	NA	NA	NA	Africa	South Africa	NA	NA	Country	Approximatelly 2008	Year	2008	2008	2008	2008	Potentially ongoing	1968	NA	NA	535.307	1218.75	1968	535.307	1218.75	ZAR	1998	Publication year
291	SC260	NA	Hosking1999	A cost-benefit analysis of removing alien trees in the Tsitsikamma mountain catchment	Hosking, S.G. and du Preez, M.	The removal of water-consuming alien vegetation and restoration of low water-consumlng indigenous vegetation, the Working for Water Programme, is the biggest conservation project In terms of manpower use currently being undertaken In South Africa. During 1998 about 40 000 jobs were created in It. The economic case for the programme in selected mountain catchments in the Western Cape has already b…	1999	English	Peer-reviewed article	NA	Yes	Plantae	Tracheophyta	Magnoliopsida	Fabales	Fabaceae	Acacia	Acacia mearnsii	NA	Black wattle	Terrestrial	terrestrial	N	NA	NA	N	Africa	South Africa	NA	Tsitsikamma	Unit (~29 600 ha)	1995	Year	1995	2030	1995	2030	Potentially ongoing	2006	NA	NA	483.164	1152.25	2006	483.164	1152.25	ZAR	1999	Publication year
292	SC261	NA	Hosking2002	Evaluating the environmental use of water - Selected case studies in the eastern and southern cape	Hosking SG; du Preez M; Campbell E.E; Wooldrige T.H. & du Plessis L.L.	South Africa is a drought-prone, water-poor region (Burgers, Marais & Bekker 1995:101). It has a mean annual rainfall of only 502mm and a mean annual runoff of only 42mm (420m3/ha/a) and for these reasons it seems very probable that water shortages will limit economic development in South Africa during the Twenty-first century (Briers & Powell 1993:1). Consequently, it is imperative that its wate…	2002	English	Official report	Versveld1998	Yes	Plantae	Tracheophyta	Magnoliopsida	Fabales	Fabaceae	Acacia	Acacia sp.	NA	Acacia	Terrestrial	terrestrial	N	NA	NA	NA	Africa	South Africa	NA	NA	Country	Approximatelly 1998	Year	1998	1998	1998	1998	Potentially ongoing	2063	NA	NA	561.148	1277.58	2063	561.148	1277.58	ZAR	1998	Publication year
293	SC262	NA	Gaertner2012	Plant invasions, restoration, and economics: Perspectives from South African fynbos	Gaertner, M., Nottebrock, H., Fourie, H., Privett, S.D., and Richardson, D.M.	Restoration is gaining importance in the management of plant invasions. As the success of restoration projects is frequently determined by factors other than ecological ones, we explored the ecological and financial feasibility of active restoration on three different invaded sites in South Africaâ€™s Cape Floristic Region. The aim of our study was to identify cost-effective ways of restoring fun…	2012	English	Peer-reviewed article	NA	Yes	Plantae	Tracheophyta	Magnoliopsida	Myrtales	Myrtaceae	Eucalyptus	Eucalyptus sp.	NA	Gum trees	Terrestrial	terrestrial	N	NA	NA	N	Africa	South Africa	NA	Agulhas Plain	Unit (11200 m2)	2007-2010	Period	2007	2010	2007	2010	One-time	2065	NA	NA	268.532	447.048	516.25	67.133	111.762	ZAR	2012	Effective
294	SC263	NA	Macdonall&Wissel1992	Determining optimal clearing treatments for the alien invasive shrub Acacia saligna in the southwestern Cape, South Africa	Macdonald, I.A.W., Wissel, C.	The results of a replicated field-scale trial of a range of control treatments for Acacia saligna were used to create a probabilistic model of the effects of repeated treatment applications. Using estimates of costs per plant treated for each treatment and for each of four size classes of plants, it was possible to compute the costs for every treatment combination. A Markov-chain model was create…	1992	English	Peer-reviewed article	Macdonall&Wissel1989	Yes	Plantae	Tracheophyta	Magnoliopsida	Fabales	Fabaceae	Acacia	Acacia saligna	NA	Port Jackson willow	Terrestrial	terrestrial	N	Fynbos	3	N	Africa	South Africa	NA	Southwestern Cape	Site	1992-1996	Period	1992	1996	1992	1996	Potentially ongoing	2168	NA	NA	3467.51	8094.21	433.6	693.502	1618.84	ZAR	1984	Effective
295	SC266	NA	Borrel2011	Chemical control of invasive Psidium guajava in Swaziland: A preliminary assessment of costs and efficacy	Borrel, A.J., Brown, L.R., Slater, K.	Psidium guajava (guava) is recognised as the third most important invasive alien plant species in the moist savanna biome of South Africa, Lesotho and Swaziland. The cost of initial clearing of alien plants reaches up to R3 000-00 per ha, therefore the application of correct control methods is essential for cost-effective reduction of the spread. The aim of this study was to test the cost effecti…	2011	English	Peer-reviewed article	NA	Yes	Plantae	Tracheophyta	Magnoliopsida	Myrtales	Myrtaceae	Psidium	Psidium guajava	NA	Guava	Terrestrial	terrestrial	N	NA	4	Y	Africa	Swaziland	NA	Upper Middleveld	Unit (1 ha)	2008-2009	Year	2008	2009	2008	2009	One-time	2302	NA	NA	317.241	770.47	2302	317.241	770.47	ZAR	2008	Effective
296	SC268	NA	Borrel2011	Chemical control of invasive Psidium guajava in Swaziland: A preliminary assessment of costs and efficacy	Borrel, A.J., Brown, L.R., Slater, K.	Psidium guajava (guava) is recognised as the third most important invasive alien plant species in the moist savanna biome of South Africa, Lesotho and Swaziland. The cost of initial clearing of alien plants reaches up to R3 000-00 per ha, therefore the application of correct control methods is essential for cost-effective reduction of the spread. The aim of this study was to test the cost effecti…	2011	English	Peer-reviewed article	NA	Yes	Plantae	Tracheophyta	Magnoliopsida	Myrtales	Myrtaceae	Psidium	Psidium guajava	NA	Guava	Terrestrial	terrestrial	N	NA	4	Y	Africa	Swaziland	NA	Upper Middleveld	Unit (1 ha)	2008-2009	Year	2008	2009	2008	2009	One-time	2322	NA	NA	319.998	777.164	2322	319.998	777.164	ZAR	2008	Effective
297	SC269	TC	EMTC_15	Costs and benefits of biological control of invasive alien plants: case studies from South Africa	Van Wilgen et al	NA	2004	English	Peer-reviewed article	NA	Yes	Plantae	Tracheophyta	Magnoliopsida	Proteales	Proteaceae	Hakea	Hakea sericea	NA	Silky Hakea	Terrestrial	terrestrial	N	NA	NA	N	Africa	South Africa	NA	South Africa	Unit (ha)	2000	Year	2000	2000	2000	2000	One-time	2410	NA	NA	494.326	1258.34	2410	494.326	1258.34	ZAR	2000	Effective
298	SC273	NA	Gaertner2012	Plant invasions, restoration, and economics: Perspectives from South African fynbos	Gaertner, M., Nottebrock, H., Fourie, H., Privett, S.D., and Richardson, D.M.	Restoration is gaining importance in the management of plant invasions. As the success of restoration projects is frequently determined by factors other than ecological ones, we explored the ecological and financial feasibility of active restoration on three different invaded sites in South Africaâ€™s Cape Floristic Region. The aim of our study was to identify cost-effective ways of restoring fun…	2012	English	Peer-reviewed article	NA	Yes	Plantae	Tracheophyta	Liliopsida	Cyperales	Poaceae	Cenchrus	Cenchrus clandestinus	NA	Kikuyu grass	Terrestrial	terrestrial	N	NA	NA	N	Africa	South Africa	NA	Agulhas Plain	Unit (840 m2)	2007-2010	Period	2007	2010	2007	2010	One-time	2558	NA	NA	332.642	553.776	639.5	83.1604	138.444	ZAR	2012	Effective
299	SC274	NA	Macdonall&Wissel1992	Determining optimal clearing treatments for the alien invasive shrub Acacia saligna in the southwestern Cape, South Africa	Macdonald, I.A.W., Wissel, C.	The results of a replicated field-scale trial of a range of control treatments for Acacia saligna were used to create a probabilistic model of the effects of repeated treatment applications. Using estimates of costs per plant treated for each treatment and for each of four size classes of plants, it was possible to compute the costs for every treatment combination. A Markov-chain model was create…	1992	English	Peer-reviewed article	Macdonall&Wissel1989	Yes	Plantae	Tracheophyta	Magnoliopsida	Fabales	Fabaceae	Acacia	Acacia saligna	NA	Port Jackson willow	Terrestrial	terrestrial	N	Fynbos	3	N	Africa	South Africa	NA	Southwestern Cape	Site	1992-1996	Period	1992	1996	1992	1996	Potentially ongoing	2711	NA	NA	4335.99	10121.5	542.2	867.197	2024.3	ZAR	1984	Effective
301	SC276	NA	Currie2009	Cost-benefit analysis of alien vegetation clearing for water yield and tourism in a mountain catchment in the Western Cape of South Africa	Currie B Milton SJ Steenkamp JC	Economic analysis is used to assess the costs and benefits of restoration following clearing of invasive alien trees in the floristically rich Fynbos mountainous area near Franschhoek, Western Cape of South Africa. The Groot Drakenstein, Franschhoek and Jonkershoek mountains receives more rainfall than the surrounding areas and is an important source of water for the city of Cape Town. The costs …	2009	English	Peer-reviewed article	NA	Yes	Plantae	Tracheophyta	Magnoliopsida	Diverse/Unspecified	Diverse/Unspecified	Diverse/Unspecified	Diverse/Unspecified	NA	Trees (Acacias and pines)	Terrestrial	terrestrial	N	Fynbos	3	N	Africa	South Africa	NA	Assegaaibos Mountain Catchment	Site	1996	Year	1996	1996	1996	1996	One-time	2843	NA	NA	3456.86	6494.36	2843	3456.86	6494.36	USD	2006	Effective
302	SC277	NA	Hosking2002	Evaluating the environmental use of water - Selected case studies in the eastern and southern cape	Hosking SG; du Preez M; Campbell E.E; Wooldrige T.H. & du Plessis L.L.	South Africa is a drought-prone, water-poor region (Burgers, Marais & Bekker 1995:101). It has a mean annual rainfall of only 502mm and a mean annual runoff of only 42mm (420m3/ha/a) and for these reasons it seems very probable that water shortages will limit economic development in South Africa during the Twenty-first century (Briers & Powell 1993:1). Consequently, it is imperative that its wate…	2002	English	Official report	Versveld1998	Yes	Plantae	Tracheophyta	Magnoliopsida	Diverse/Unspecified	Diverse/Unspecified	Diverse/Unspecified	Diverse/Unspecified	NA	Tall trees other than acacia, eucalyptus, pines and hakeas	Terrestrial	terrestrial	N	NA	NA	NA	Africa	South Africa	NA	NA	Country	Approximatelly 2007	Year	2007	2007	2007	2007	Potentially ongoing	2938	NA	NA	799.152	1819.46	2938	799.152	1819.46	ZAR	1998	Publication year
303	SC282	NA	Leavold2007	Development of case studies on the economic impacts of invasive species in Africa: Salvinia molesta	Leavold, V. Lloyd, L. and Lepetit, J.	This report details the results of an extensive desktop study to quantify the economic impacts of an invasive weed species in Africa. Salvinia molesta (Salvinia) is a floating water weed found in the lower Senegal River delta in Senegal. Salvinia reproduces vegetatively, is easily spread by flowing water as well as by stock, vehicles and water craft. The plant forms a thick mat on the waterâ€™s s…	2007	English	Peer-reviewed article	Chikwenhere and Keswani, 1997	Yes	Plantae	Tracheophyta	Polypodiopsida	Salviniales	Salviniaceae	Salvinia	Salvinia molesta	NA	Kariba weed	Aquatic	aquatic	N	NA	NA	N	Africa	Zimbabwe	NA	Zimbabwe	Unit (16 ha)	1989	Period	1989	1989	1989	1989	One-time	3000	NA	NA	2.7963e+06	NA	3000	2.7963e+06	NA	ZWL	1989	Effective
304	SC285	NA	Gaertner2012	Plant invasions, restoration, and economics: Perspectives from South African fynbos	Gaertner, M., Nottebrock, H., Fourie, H., Privett, S.D., and Richardson, D.M.	Restoration is gaining importance in the management of plant invasions. As the success of restoration projects is frequently determined by factors other than ecological ones, we explored the ecological and financial feasibility of active restoration on three different invaded sites in South Africaâ€™s Cape Floristic Region. The aim of our study was to identify cost-effective ways of restoring fun…	2012	English	Peer-reviewed article	NA	Yes	Plantae	Tracheophyta	Magnoliopsida	Myrtales	Myrtaceae	Eucalyptus	Eucalyptus sp.	NA	Gum trees	Terrestrial	terrestrial	N	NA	NA	N	Africa	South Africa	NA	Agulhas Plain	Unit (11200 m2)	2007-2010	Period	2007	2010	2007	2010	One-time	3045	NA	NA	395.971	659.206	761.25	98.9928	164.801	ZAR	2012	Effective
305	SC291	TC	EMTC_15	Costs and benefits of biological control of invasive alien plants: case studies from South Africa	Van Wilgen et al	NA	2004	English	Peer-reviewed article	NA	Yes	Plantae	Tracheophyta	Magnoliopsida	Fabales	Fabaceae	Acacia	Acacia longifolia	NA	Long-leaved wattle	Terrestrial	terrestrial	N	NA	NA	N	Africa	South Africa	NA	South Africa	Unit (ha)	2000	Year	2000	2000	2000	2000	One-time	3410	NA	NA	699.44	1780.47	3410	699.44	1780.47	ZAR	2000	Effective
306	SC292	GS	VanWyk2002	The cost of water hyacinth control in South Africa: a case study of three options	Van Wyk,E., Van Wilgen, B.W.	The aquatic plant water hyacinth (Eichhornia crassipes) was first recorded in South Africa during the early part of the 20th century. The plant has since spread across the country and is found in water bodies in both sub-tropical and temperate areas. The biology, ecology and impacts of water hyacinth are well studied, but sound and cost-effective management of it remains an enormous challenge in …	2002	English	Peer-reviewed article	NA	Yes	Plantae	Tracheophyta	Liliopsida	Pontederiales	Pontederiaceae	Eichhornia	Eichhornia crassipes	NA	water hyacinth	Aquatic	aquatic	N	NA	11	N	Africa	South Africa	NA	Hartbeespoort Dam	Site	1990	Year	1990	1990	1990	1990	One-time	3425	NA	NA	1518.95	2720.44	3425	1518.95	2720.44	ZAR	1995	Effective
307	SC297	GS	VanWyk2002	The cost of water hyacinth control in South Africa: a case study of three options	Van Wyk,E., Van Wilgen, B.W.	The aquatic plant water hyacinth (Eichhornia crassipes) was first recorded in South Africa during the early part of the 20th century. The plant has since spread across the country and is found in water bodies in both sub-tropical and temperate areas. The biology, ecology and impacts of water hyacinth are well studied, but sound and cost-effective management of it remains an enormous challenge in …	2002	English	Peer-reviewed article	NA	Yes	Plantae	Tracheophyta	Liliopsida	Pontederiales	Pontederiaceae	Eichhornia	Eichhornia crassipes	NA	water hyacinth	Aquatic	aquatic	N	NA	11	N	Africa	South Africa	NA	New Yearâ€™s Dam	Site	1997	Year	1997	1997	1997	1997	One-time	3575.19	NA	NA	1585.56	2839.74	3575.19	1585.56	2839.74	ZAR	1995	Effective
308	SC298	TC	EMTC_15	Costs and benefits of biological control of invasive alien plants: case studies from South Africa	Van Wilgen et al	NA	2004	English	Peer-reviewed article	NA	Yes	Plantae	Tracheophyta	Magnoliopsida	Fabales	Fabaceae	Acacia	Acacia pycnantha	NA	Golden wattle	Terrestrial	terrestrial	N	NA	NA	N	Africa	South Africa	NA	South Africa	Unit (ha)	2000	Year	2000	2000	2000	2000	One-time	3600	NA	NA	738.412	1879.68	3600	738.412	1879.68	ZAR	2000	Effective
309	SC303	NA	Gaertner2012	Plant invasions, restoration, and economics: Perspectives from South African fynbos	Gaertner, M., Nottebrock, H., Fourie, H., Privett, S.D., and Richardson, D.M.	Restoration is gaining importance in the management of plant invasions. As the success of restoration projects is frequently determined by factors other than ecological ones, we explored the ecological and financial feasibility of active restoration on three different invaded sites in South Africaâ€™s Cape Floristic Region. The aim of our study was to identify cost-effective ways of restoring fun…	2012	English	Peer-reviewed article	NA	Yes	Plantae	Tracheophyta	Magnoliopsida	Fabales	Fabaceae	Acacia	Acacia sp.	NA	Wattles	Terrestrial	terrestrial	N	NA	NA	N	Africa	South Africa	NA	Agulhas Plain	Unit (4950 m2)	2007-2010	Period	2007	2010	2007	2010	One-time	3799	NA	NA	494.021	822.438	949.75	123.505	205.609	ZAR	2012	Effective
310	SC304	NA	Hosking2002	Evaluating the environmental use of water - Selected case studies in the eastern and southern cape	Hosking SG; du Preez M; Campbell E.E; Wooldrige T.H. & du Plessis L.L.	South Africa is a drought-prone, water-poor region (Burgers, Marais & Bekker 1995:101). It has a mean annual rainfall of only 502mm and a mean annual runoff of only 42mm (420m3/ha/a) and for these reasons it seems very probable that water shortages will limit economic development in South Africa during the Twenty-first century (Briers & Powell 1993:1). Consequently, it is imperative that its wate…	2002	English	Official report	Versveld1998	Yes	Plantae	Tracheophyta	Magnoliopsida	Diverse/Unspecified	Diverse/Unspecified	Diverse/Unspecified	Diverse/Unspecified	NA	Pines and hakeas	Terrestrial	terrestrial	N	NA	NA	NA	Africa	South Africa	NA	NA	Country	Approximatelly 2004	Year	2004	2004	2004	2004	Potentially ongoing	3844	NA	NA	1045.59	2380.53	3844	1045.59	2380.53	ZAR	1998	Publication year
311	SC306	GS	VanWyk2002	The cost of water hyacinth control in South Africa: a case study of three options	Van Wyk,E., Van Wilgen, B.W.	The aquatic plant water hyacinth (Eichhornia crassipes) was first recorded in South Africa during the early part of the 20th century. The plant has since spread across the country and is found in water bodies in both sub-tropical and temperate areas. The biology, ecology and impacts of water hyacinth are well studied, but sound and cost-effective management of it remains an enormous challenge in …	2002	English	Peer-reviewed article	NA	Yes	Plantae	Tracheophyta	Liliopsida	Pontederiales	Pontederiaceae	Eichhornia	Eichhornia crassipes	NA	water hyacinth	Aquatic	aquatic	N	NA	11	N	Africa	South Africa	NA	Hartbeespoort Dam	Site	1989	Year	1989	1989	1989	1989	One-time	3945	NA	NA	1749.56	3133.47	3945	1749.56	3133.47	ZAR	1995	Effective
312	SC309	NA	Higgins1997a	A dynamic ecological-economic model as a tool for conflict resolution in an invasive-alien-plant, biological control and native-plant scenario	Higgins SI Azorin EJ Cowling RM Morris MJ	The release of biological control agents for the control of environmental weeds is often resisted by parties which utilize these plants. This conflict is difficult to resolve because of the social, economic and ecological complexities involved. We construct an ecological-economic model to simulate the complex dynamics of the release of a biological control agent with the aim of developing a tool …	1997	English	Peer-reviewed article	Privett1995	Yes	Plantae	Tracheophyta	Magnoliopsida	Fabales	Fabaceae	Acacia	Acacia saligna	NA	Port Jackson willow	Terrestrial	terrestrial	N	Fynbos	3	N	Africa	South Africa	NA	Lowlands Of The Fynbos Of The Western Cape	Site	Approximatelly between 1997 50 years later	Year	1997	1997	1997	1997	Potentially ongoing	4000	2000	6000	1325.59	2681.3	4000	1325.59	2681.3	ZAR	1997	Publication year
313	SC315	NA	Gaertner2012	Plant invasions, restoration, and economics: Perspectives from South African fynbos	Gaertner, M., Nottebrock, H., Fourie, H., Privett, S.D., and Richardson, D.M.	Restoration is gaining importance in the management of plant invasions. As the success of restoration projects is frequently determined by factors other than ecological ones, we explored the ecological and financial feasibility of active restoration on three different invaded sites in South Africaâ€™s Cape Floristic Region. The aim of our study was to identify cost-effective ways of restoring fun…	2012	English	Peer-reviewed article	NA	Yes	Plantae	Tracheophyta	Magnoliopsida	Myrtales	Myrtaceae	Eucalyptus	Eucalyptus sp.	NA	Gum trees	Terrestrial	terrestrial	N	NA	NA	N	Africa	South Africa	NA	Agulhas Plain	Unit (11200 m2)	2007-2010	Period	2007	2010	2007	2010	One-time	4111	NA	NA	534.593	889.982	1027.75	133.648	222.496	ZAR	2012	Effective
314	SC322	GS	VanWyk2002	The cost of water hyacinth control in South Africa: a case study of three options	Van Wyk,E., Van Wilgen, B.W.	The aquatic plant water hyacinth (Eichhornia crassipes) was first recorded in South Africa during the early part of the 20th century. The plant has since spread across the country and is found in water bodies in both sub-tropical and temperate areas. The biology, ecology and impacts of water hyacinth are well studied, but sound and cost-effective management of it remains an enormous challenge in …	2002	English	Peer-reviewed article	NA	Yes	Plantae	Tracheophyta	Liliopsida	Pontederiales	Pontederiaceae	Eichhornia	Eichhornia crassipes	NA	water hyacinth	Aquatic	aquatic	N	NA	11	N	Africa	South Africa	NA	Hartbeespoort Dam	Site	1988	Year	1988	1988	1988	1988	One-time	4464	NA	NA	1979.73	3545.71	4464	1979.73	3545.71	ZAR	1995	Effective
315	SC324	NA	Hosking2002	Evaluating the environmental use of water - Selected case studies in the eastern and southern cape	Hosking SG; du Preez M; Campbell E.E; Wooldrige T.H. & du Plessis L.L.	South Africa is a drought-prone, water-poor region (Burgers, Marais & Bekker 1995:101). It has a mean annual rainfall of only 502mm and a mean annual runoff of only 42mm (420m3/ha/a) and for these reasons it seems very probable that water shortages will limit economic development in South Africa during the Twenty-first century (Briers & Powell 1993:1). Consequently, it is imperative that its wate…	2002	English	Official report	Versveld1998	Yes	Plantae	Tracheophyta	Magnoliopsida	Myrtales	Myrtaceae	Eucalyptus	Eucalyptus sp.	NA	Eucalyptus	Terrestrial	terrestrial	N	NA	NA	NA	Africa	South Africa	NA	NA	Country	Approximatelly 2001	Year	2001	2001	2001	2001	Potentially ongoing	4518	NA	NA	1228.92	2797.92	4518	1228.92	2797.92	ZAR	1998	Publication year
316	SC325	NA	Leavold2007	Development of case studies on the economic impacts of invasive species in Africa: Salvinia molesta	Leavold, V. Lloyd, L. and Lepetit, J.	This report details the results of an extensive desktop study to quantify the economic impacts of an invasive weed species in Africa. Salvinia molesta (Salvinia) is a floating water weed found in the lower Senegal River delta in Senegal. Salvinia reproduces vegetatively, is easily spread by flowing water as well as by stock, vehicles and water craft. The plant forms a thick mat on the waterâ€™s s…	2007	English	Peer-reviewed article	Chikwenhere and Keswani, 1997	Yes	Plantae	Tracheophyta	Polypodiopsida	Salviniales	Salviniaceae	Salvinia	Salvinia molesta	NA	Kariba weed	Aquatic	aquatic	N	NA	NA	N	Africa	Zimbabwe	NA	Zimbabwe	Unit (16 ha)	1990	Period	1990	1990	1990	1990	One-time	4565	NA	NA	3.48912e+06	18610.5	4565	3.48912e+06	18610.5	ZWL	1990	Effective
317	SC328	NA	Gaertner2012	Plant invasions, restoration, and economics: Perspectives from South African fynbos	Gaertner, M., Nottebrock, H., Fourie, H., Privett, S.D., and Richardson, D.M.	Restoration is gaining importance in the management of plant invasions. As the success of restoration projects is frequently determined by factors other than ecological ones, we explored the ecological and financial feasibility of active restoration on three different invaded sites in South Africaâ€™s Cape Floristic Region. The aim of our study was to identify cost-effective ways of restoring fun…	2012	English	Peer-reviewed article	NA	Yes	Plantae	Tracheophyta	Magnoliopsida	Fabales	Fabaceae	Acacia	Acacia sp.	NA	Wattles	Terrestrial	terrestrial	N	NA	NA	N	Africa	South Africa	NA	Agulhas Plain	Unit (4950 m2)	2007-2010	Period	2007	2010	2007	2010	One-time	4779	NA	NA	621.46	1034.6	1194.75	155.365	258.649	ZAR	2012	Effective
318	SC329	NA	Hosking2002	Evaluating the environmental use of water - Selected case studies in the eastern and southern cape	Hosking SG; du Preez M; Campbell E.E; Wooldrige T.H. & du Plessis L.L.	South Africa is a drought-prone, water-poor region (Burgers, Marais & Bekker 1995:101). It has a mean annual rainfall of only 502mm and a mean annual runoff of only 42mm (420m3/ha/a) and for these reasons it seems very probable that water shortages will limit economic development in South Africa during the Twenty-first century (Briers & Powell 1993:1). Consequently, it is imperative that its wate…	2002	English	Official report	Versveld1998	Yes	Plantae	Tracheophyta	Magnoliopsida	Myrtales	Myrtaceae	Eucalyptus	Eucalyptus sp.	NA	Eucalyptus	Terrestrial	terrestrial	N	NA	NA	NA	Africa	South Africa	NA	NA	Country	Approximatelly 2001	Year	2001	2001	2001	2001	Potentially ongoing	4786	NA	NA	1301.82	2963.89	4786	1301.82	2963.89	ZAR	1998	Publication year
319	SC331	GS	VanWyk2002	The cost of water hyacinth control in South Africa: a case study of three options	Van Wyk,E., Van Wilgen, B.W.	The aquatic plant water hyacinth (Eichhornia crassipes) was first recorded in South Africa during the early part of the 20th century. The plant has since spread across the country and is found in water bodies in both sub-tropical and temperate areas. The biology, ecology and impacts of water hyacinth are well studied, but sound and cost-effective management of it remains an enormous challenge in …	2002	English	Peer-reviewed article	NA	Yes	Plantae	Tracheophyta	Liliopsida	Pontederiales	Pontederiaceae	Eichhornia	Eichhornia crassipes	NA	water hyacinth	Aquatic	aquatic	N	NA	11	N	Africa	South Africa	NA	New Yearâ€™s Dam	Site	2000	Year	2000	2000	2000	2000	One-time	4800	NA	NA	2128.75	3812.59	4800	2128.75	3812.59	ZAR	1995	Effective
320	SC339	GS	VanWyk2002	The cost of water hyacinth control in South Africa: a case study of three options	Van Wyk,E., Van Wilgen, B.W.	The aquatic plant water hyacinth (Eichhornia crassipes) was first recorded in South Africa during the early part of the 20th century. The plant has since spread across the country and is found in water bodies in both sub-tropical and temperate areas. The biology, ecology and impacts of water hyacinth are well studied, but sound and cost-effective management of it remains an enormous challenge in …	2002	English	Peer-reviewed article	NA	Yes	Plantae	Tracheophyta	Liliopsida	Pontederiales	Pontederiaceae	Eichhornia	Eichhornia crassipes	NA	water hyacinth	Aquatic	aquatic	N	NA	11	N	Africa	South Africa	NA	Hartbeespoort Dam	Site	1987	Year	1987	1987	1987	1987	One-time	5089	NA	NA	2256.92	4042.14	5089	2256.92	4042.14	ZAR	1995	Effective
321	SC340	NA	Gaertner2012	Plant invasions, restoration, and economics: Perspectives from South African fynbos	Gaertner, M., Nottebrock, H., Fourie, H., Privett, S.D., and Richardson, D.M.	Restoration is gaining importance in the management of plant invasions. As the success of restoration projects is frequently determined by factors other than ecological ones, we explored the ecological and financial feasibility of active restoration on three different invaded sites in South Africaâ€™s Cape Floristic Region. The aim of our study was to identify cost-effective ways of restoring fun…	2012	English	Peer-reviewed article	NA	Yes	Plantae	Tracheophyta	Magnoliopsida	Myrtales	Myrtaceae	Eucalyptus	Eucalyptus sp.	NA	Gum trees	Terrestrial	terrestrial	N	NA	NA	N	Africa	South Africa	NA	Agulhas Plain	Unit (11200 m2)	2007-2010	Period	2007	2010	2007	2010	One-time	5091	NA	NA	662.032	1102.14	1272.75	165.508	275.535	ZAR	2012	Effective
322	SC341	NA	Currie2009	Cost-benefit analysis of alien vegetation clearing for water yield and tourism in a mountain catchment in the Western Cape of South Africa	Currie B Milton SJ Steenkamp JC	Economic analysis is used to assess the costs and benefits of restoration following clearing of invasive alien trees in the floristically rich Fynbos mountainous area near Franschhoek, Western Cape of South Africa. The Groot Drakenstein, Franschhoek and Jonkershoek mountains receives more rainfall than the surrounding areas and is an important source of water for the city of Cape Town. The costs …	2009	English	Peer-reviewed article	NA	Yes	Plantae	Tracheophyta	Magnoliopsida	Diverse/Unspecified	Diverse/Unspecified	Diverse/Unspecified	Diverse/Unspecified	NA	Trees (Acacias and pines)	Terrestrial	terrestrial	N	Fynbos	3	N	Africa	South Africa	NA	Assegaaibos Mountain Catchment	Site	1996	Period	1996	1996	1996	1996	One-time	5200	NA	NA	6322.79	11878.5	5200	6322.79	11878.5	USD	2006	Effective
323	SC342	NA	Macdonall&Wissel1992	Determining optimal clearing treatments for the alien invasive shrub Acacia saligna in the southwestern Cape, South Africa	Macdonald, I.A.W., Wissel, C.	The results of a replicated field-scale trial of a range of control treatments for Acacia saligna were used to create a probabilistic model of the effects of repeated treatment applications. Using estimates of costs per plant treated for each treatment and for each of four size classes of plants, it was possible to compute the costs for every treatment combination. A Markov-chain model was create…	1992	English	Peer-reviewed article	Macdonall&Wissel1989	Yes	Plantae	Tracheophyta	Magnoliopsida	Fabales	Fabaceae	Acacia	Acacia saligna	NA	Port Jackson willow	Terrestrial	terrestrial	N	Fynbos	3	N	Africa	South Africa	NA	Southwestern Cape	Site	1992-1996	Period	1992	1996	1992	1996	Potentially ongoing	5285	NA	NA	8452.85	19731.5	1057	1690.57	3946.3	ZAR	1984	Effective
324	SC344	NA	Wise2007	The Economic Impact and Appropriate Management of Selected Invasive Alien Species on the African Continent	Wise, R.M., van Wilgen, B.W., Hill, M.P., Schulthess, F., Tweddle, D., Chabi-Olay, A. and Zimmermann, H.G.	This report provides case studies of the economic impact of five invasive alien species in different areas in Africa. The overall aim of this work was to provide detailed information to administrators and managers. The species were: â€¢ Nile tilapia (Oreochromis niloticus); â€¢ Water hyacinth (Eichhornia crassipes); â€¢ The larger grain borer (Prostephanus truncatus); â€¢ Parthenium weed (Parthen…	2007	English	Official report	NA	Yes	Plantae	Tracheophyta	Liliopsida	Commelinales	Pontederiaceae	Eichhornia	Eichhornia crassipes	NA	Water hyacinth	Aquatic	aquatic	N	NA	NA	N	Africa	Central African Republic	NA	Mossapoula River	Unit (100 ha)	2006	Period	2006	2006	2006	2006	One-time	5430	NA	NA	6602.45	14743.4	5430	6602.45	14743.4	USD	2006	Effective
325	SC351	GS	VanWyk2002	The cost of water hyacinth control in South Africa: a case study of three options	Van Wyk,E., Van Wilgen, B.W.	The aquatic plant water hyacinth (Eichhornia crassipes) was first recorded in South Africa during the early part of the 20th century. The plant has since spread across the country and is found in water bodies in both sub-tropical and temperate areas. The biology, ecology and impacts of water hyacinth are well studied, but sound and cost-effective management of it remains an enormous challenge in …	2002	English	Peer-reviewed article	NA	Yes	Plantae	Tracheophyta	Liliopsida	Pontederiales	Pontederiaceae	Eichhornia	Eichhornia crassipes	NA	water hyacinth	Aquatic	aquatic	N	NA	11	N	Africa	South Africa	NA	New Yearâ€™s Dam	Site	1992	Year	1992	1992	1992	1992	One-time	5743.19	NA	NA	2547.04	4561.76	5743.19	2547.04	4561.76	ZAR	1995	Effective
326	SC352	NA	Macdonall&Wissel1992	Determining optimal clearing treatments for the alien invasive shrub Acacia saligna in the southwestern Cape, South Africa	Macdonald, I.A.W., Wissel, C.	The results of a replicated field-scale trial of a range of control treatments for Acacia saligna were used to create a probabilistic model of the effects of repeated treatment applications. Using estimates of costs per plant treated for each treatment and for each of four size classes of plants, it was possible to compute the costs for every treatment combination. A Markov-chain model was create…	1992	English	Peer-reviewed article	Macdonall&Wissel1989	Yes	Plantae	Tracheophyta	Magnoliopsida	Fabales	Fabaceae	Acacia	Acacia saligna	NA	Port Jackson willow	Terrestrial	terrestrial	N	Fynbos	3	N	Africa	South Africa	NA	Southwestern Cape	Site	1992-1996	Period	1992	1996	1992	1996	Potentially ongoing	5823	NA	NA	9313.33	21740.1	1164.6	1862.67	4348.02	ZAR	1984	Effective
327	SC361	GS	VanWyk2002	The cost of water hyacinth control in South Africa: a case study of three options	Van Wyk,E., Van Wilgen, B.W.	The aquatic plant water hyacinth (Eichhornia crassipes) was first recorded in South Africa during the early part of the 20th century. The plant has since spread across the country and is found in water bodies in both sub-tropical and temperate areas. The biology, ecology and impacts of water hyacinth are well studied, but sound and cost-effective management of it remains an enormous challenge in …	2002	English	Peer-reviewed article	NA	Yes	Plantae	Tracheophyta	Liliopsida	Pontederiales	Pontederiaceae	Eichhornia	Eichhornia crassipes	NA	water hyacinth	Aquatic	aquatic	N	NA	11	N	Africa	South Africa	NA	New Yearâ€™s Dam	Site	1995	Year	1995	1995	1995	1995	One-time	6045.92	NA	NA	2681.3	4802.21	6045.92	2681.3	4802.21	ZAR	1995	Effective
328	SC364	GS	VanWyk2002	The cost of water hyacinth control in South Africa: a case study of three options	Van Wyk,E., Van Wilgen, B.W.	The aquatic plant water hyacinth (Eichhornia crassipes) was first recorded in South Africa during the early part of the 20th century. The plant has since spread across the country and is found in water bodies in both sub-tropical and temperate areas. The biology, ecology and impacts of water hyacinth are well studied, but sound and cost-effective management of it remains an enormous challenge in …	2002	English	Peer-reviewed article	NA	Yes	Plantae	Tracheophyta	Liliopsida	Pontederiales	Pontederiaceae	Eichhornia	Eichhornia crassipes	NA	water hyacinth	Aquatic	aquatic	N	NA	11	N	Africa	South Africa	NA	Hartbeespoort Dam	Site	1986	Year	1986	1986	1986	1986	One-time	6079	NA	NA	2695.97	4828.49	6079	2695.97	4828.49	ZAR	1995	Effective
329	SC365	GS	VanWyk2002	The cost of water hyacinth control in South Africa: a case study of three options	Van Wyk,E., Van Wilgen, B.W.	The aquatic plant water hyacinth (Eichhornia crassipes) was first recorded in South Africa during the early part of the 20th century. The plant has since spread across the country and is found in water bodies in both sub-tropical and temperate areas. The biology, ecology and impacts of water hyacinth are well studied, but sound and cost-effective management of it remains an enormous challenge in …	2002	English	Peer-reviewed article	NA	Yes	Plantae	Tracheophyta	Liliopsida	Pontederiales	Pontederiaceae	Eichhornia	Eichhornia crassipes	NA	water hyacinth	Aquatic	aquatic	N	NA	11	N	Africa	South Africa	NA	New Yearâ€™s Dam	Site	1998	Year	1998	1998	1998	1998	One-time	6200.44	NA	NA	2749.83	4924.95	6200.44	2749.83	4924.95	ZAR	1995	Effective
330	SC367	NA	Leavold2007	Development of case studies on the economic impacts of invasive species in Africa: Salvinia molesta	Leavold, V. Lloyd, L. and Lepetit, J.	This report details the results of an extensive desktop study to quantify the economic impacts of an invasive weed species in Africa. Salvinia molesta (Salvinia) is a floating water weed found in the lower Senegal River delta in Senegal. Salvinia reproduces vegetatively, is easily spread by flowing water as well as by stock, vehicles and water craft. The plant forms a thick mat on the waterâ€™s s…	2007	English	Peer-reviewed article	Chikwenhere and Keswani, 1997	Yes	Plantae	Tracheophyta	Polypodiopsida	Salviniales	Salviniaceae	Salvinia	Salvinia molesta	NA	Kariba weed	Aquatic	aquatic	N	NA	NA	N	Africa	Zimbabwe	NA	Zimbabwe	Unit (16 ha)	1992	Year	1992	1993	1992	1993	One-time	6385	NA	NA	2.18523e+06	32016.3	6385	2.18523e+06	32016.3	ZWL	1992	Effective
331	SC379	GS	VanWyk2002	The cost of water hyacinth control in South Africa: a case study of three options	Van Wyk,E., Van Wilgen, B.W.	The aquatic plant water hyacinth (Eichhornia crassipes) was first recorded in South Africa during the early part of the 20th century. The plant has since spread across the country and is found in water bodies in both sub-tropical and temperate areas. The biology, ecology and impacts of water hyacinth are well studied, but sound and cost-effective management of it remains an enormous challenge in …	2002	English	Peer-reviewed article	NA	Yes	Plantae	Tracheophyta	Liliopsida	Pontederiales	Pontederiaceae	Eichhornia	Eichhornia crassipes	NA	water hyacinth	Aquatic	aquatic	N	NA	11	N	Africa	South Africa	NA	Hartbeespoort Dam	Site	1985	Year	1985	1985	1985	1985	One-time	7117	NA	NA	3156.31	5652.96	7117	3156.31	5652.96	ZAR	1995	Effective
332	SC386	GS	VanWyk2002	The cost of water hyacinth control in South Africa: a case study of three options	Van Wyk,E., Van Wilgen, B.W.	The aquatic plant water hyacinth (Eichhornia crassipes) was first recorded in South Africa during the early part of the 20th century. The plant has since spread across the country and is found in water bodies in both sub-tropical and temperate areas. The biology, ecology and impacts of water hyacinth are well studied, but sound and cost-effective management of it remains an enormous challenge in …	2002	English	Peer-reviewed article	NA	Yes	Plantae	Tracheophyta	Liliopsida	Pontederiales	Pontederiaceae	Eichhornia	Eichhornia crassipes	NA	water hyacinth	Aquatic	aquatic	N	NA	11	N	Africa	South Africa	NA	Hartbeespoort Dam	Site	1984	Year	1984	1984	1984	1984	One-time	7692	NA	NA	3411.32	6109.68	7692	3411.32	6109.68	ZAR	1995	Effective
333	SC387	NA	McConnachie2003	Economic evaluation of the successful biological control of Azolla filiculoides in South Africa	McConnachie, A.J., de Wit, M.T., Hill, M.P., Byrne, M.J.	Azolla filiculoides (red waterfern) is a floating fern native to South America which has invaded aquatic ecosystems in South Africa. Thick mats of A. filiculoides on dams and slow-moving water bodies cause economic losses to water-users. Affected waterusers were surveyed using a questionnaire to assess the importance of the weed. Among those most seriously affected were farming (71%), recreationa…	2003	English	Peer-reviewed article	NA	Yes	Plantae	Tracheophyta	Polypodiopsida	Salviniales	Salviniaceae	Azolla	Azolla filiculoides	NA	Red water fern	Aquatic	aquatic	N	NA	11	N	Africa	South Africa	NA	South Africa	Site	2000	Year	NA	NA	2000	2000	Potentially ongoing	7940	NA	NA	11302.3	28770.7	7940	11302.3	28770.7	USD	2000	Effective
335	SC391	GS	VanWyk2002	The cost of water hyacinth control in South Africa: a case study of three options	Van Wyk,E., Van Wilgen, B.W.	The aquatic plant water hyacinth (Eichhornia crassipes) was first recorded in South Africa during the early part of the 20th century. The plant has since spread across the country and is found in water bodies in both sub-tropical and temperate areas. The biology, ecology and impacts of water hyacinth are well studied, but sound and cost-effective management of it remains an enormous challenge in …	2002	English	Peer-reviewed article	NA	Yes	Plantae	Tracheophyta	Liliopsida	Pontederiales	Pontederiaceae	Eichhornia	Eichhornia crassipes	NA	water hyacinth	Aquatic	aquatic	N	NA	11	N	Africa	South Africa	NA	New Yearâ€™s Dam	Site	1998	Year	1998	1998	1998	1998	One-time	8280.62	NA	NA	3672.36	6577.21	8280.62	3672.36	6577.21	ZAR	1995	Effective
336	SC393	GS	VanWyk2002	The cost of water hyacinth control in South Africa: a case study of three options	Van Wyk,E., Van Wilgen, B.W.	The aquatic plant water hyacinth (Eichhornia crassipes) was first recorded in South Africa during the early part of the 20th century. The plant has since spread across the country and is found in water bodies in both sub-tropical and temperate areas. The biology, ecology and impacts of water hyacinth are well studied, but sound and cost-effective management of it remains an enormous challenge in …	2002	English	Peer-reviewed article	NA	Yes	Plantae	Tracheophyta	Liliopsida	Pontederiales	Pontederiaceae	Eichhornia	Eichhornia crassipes	NA	water hyacinth	Aquatic	aquatic	N	NA	11	N	Africa	South Africa	NA	Hartbeespoort Dam	Site	1983	Year	1983	1983	1983	1983	One-time	8511	NA	NA	3774.53	6760.2	8511	3774.53	6760.2	ZAR	1995	Effective
337	SC401	GS	VanWyk2002	The cost of water hyacinth control in South Africa: a case study of three options	Van Wyk,E., Van Wilgen, B.W.	The aquatic plant water hyacinth (Eichhornia crassipes) was first recorded in South Africa during the early part of the 20th century. The plant has since spread across the country and is found in water bodies in both sub-tropical and temperate areas. The biology, ecology and impacts of water hyacinth are well studied, but sound and cost-effective management of it remains an enormous challenge in …	2002	English	Peer-reviewed article	NA	Yes	Plantae	Tracheophyta	Liliopsida	Pontederiales	Pontederiaceae	Eichhornia	Eichhornia crassipes	NA	water hyacinth	Aquatic	aquatic	N	NA	11	N	Africa	South Africa	NA	New Yearâ€™s Dam	Site	1993	Year	1993	1993	1993	1993	One-time	9317.99	NA	NA	4132.43	7401.19	9317.99	4132.43	7401.19	ZAR	1995	Effective
338	SC414	NA	Vogele1991	Biological control of the fruit tree mealybugÂ Rastrococcus invadensÂ Williams in Togo: A preliminary sociological and economic evaluation	VÃ¶gele, J.M., Agounke, D., Moore, D.	The fruit tree mealybugÂ Rastrococcus invadensÂ Williams, accidentally introduced into the West African region in the early 1980s, has been the subject of a successful biological control programme in Togo and elsewhere in West Africa. It is now kept at low population densities by the introduced specific parasitoidÂ Gyranusoidea tebygiÂ Noyes. The sociological and economic impact of this successfu…	1991	English	Peer-reviewed article	NA	Yes	Animalia	Arthropoda	Insecta	Hemiptera	Pseudococcidae	Rastrococcus	Rastrococcus invadens	NA	Fruit tree mealybug	Terrestrial	terrestrial	N	NA	12b	N	Africa	Togo	NA	Togo	Country	1990	Year	1990	1990	1990	1990	One-time	10040	NA	NA	18835.4	36785.3	10040	18835.4	36785.3	USD	1990	Effective
339	SC415	GS	VanWyk2002	The cost of water hyacinth control in South Africa: a case study of three options	Van Wyk,E., Van Wilgen, B.W.	The aquatic plant water hyacinth (Eichhornia crassipes) was first recorded in South Africa during the early part of the 20th century. The plant has since spread across the country and is found in water bodies in both sub-tropical and temperate areas. The biology, ecology and impacts of water hyacinth are well studied, but sound and cost-effective management of it remains an enormous challenge in …	2002	English	Peer-reviewed article	NA	Yes	Plantae	Tracheophyta	Liliopsida	Pontederiales	Pontederiaceae	Eichhornia	Eichhornia crassipes	NA	water hyacinth	Aquatic	aquatic	N	NA	11	N	Africa	South Africa	NA	New Yearâ€™s Dam	Site	1991	Year	1991	1991	1991	1991	One-time	10089.5	NA	NA	4474.56	8013.95	10089.5	4474.56	8013.95	ZAR	1995	Effective
340	SC420	GS	VanWyk2002	The cost of water hyacinth control in South Africa: a case study of three options	Van Wyk,E., Van Wilgen, B.W.	The aquatic plant water hyacinth (Eichhornia crassipes) was first recorded in South Africa during the early part of the 20th century. The plant has since spread across the country and is found in water bodies in both sub-tropical and temperate areas. The biology, ecology and impacts of water hyacinth are well studied, but sound and cost-effective management of it remains an enormous challenge in …	2002	English	Peer-reviewed article	NA	Yes	Plantae	Tracheophyta	Liliopsida	Pontederiales	Pontederiaceae	Eichhornia	Eichhornia crassipes	NA	water hyacinth	Aquatic	aquatic	N	NA	11	N	Africa	South Africa	NA	Nseleni System, Kwazulu-natal	Site	1990	Year	1990	1990	1990	1990	One-time	10703.4	NA	NA	4746.82	8501.57	10703.4	4746.82	8501.57	ZAR	1995	Effective
341	SC425	GS	VanWyk2002	The cost of water hyacinth control in South Africa: a case study of three options	Van Wyk,E., Van Wilgen, B.W.	The aquatic plant water hyacinth (Eichhornia crassipes) was first recorded in South Africa during the early part of the 20th century. The plant has since spread across the country and is found in water bodies in both sub-tropical and temperate areas. The biology, ecology and impacts of water hyacinth are well studied, but sound and cost-effective management of it remains an enormous challenge in …	2002	English	Peer-reviewed article	NA	Yes	Plantae	Tracheophyta	Liliopsida	Pontederiales	Pontederiaceae	Eichhornia	Eichhornia crassipes	NA	water hyacinth	Aquatic	aquatic	N	NA	11	N	Africa	South Africa	NA	Nseleni System, Kwazulu-natal	Site	1985	Year	1985	1985	1985	1985	One-time	11360.7	NA	NA	5038.35	9023.7	11360.7	5038.35	9023.7	ZAR	1995	Effective
342	SC426	GS	VanWyk2002	The cost of water hyacinth control in South Africa: a case study of three options	Van Wyk,E., Van Wilgen, B.W.	The aquatic plant water hyacinth (Eichhornia crassipes) was first recorded in South Africa during the early part of the 20th century. The plant has since spread across the country and is found in water bodies in both sub-tropical and temperate areas. The biology, ecology and impacts of water hyacinth are well studied, but sound and cost-effective management of it remains an enormous challenge in …	2002	English	Peer-reviewed article	NA	Yes	Plantae	Tracheophyta	Liliopsida	Pontederiales	Pontederiaceae	Eichhornia	Eichhornia crassipes	NA	water hyacinth	Aquatic	aquatic	N	NA	11	N	Africa	South Africa	NA	Hartbeespoort Dam	Site	1982	Year	1982	1982	1982	1982	One-time	11650	NA	NA	5166.65	9253.48	11650	5166.65	9253.48	ZAR	1995	Effective
343	SC428	GS	VanWyk2002	The cost of water hyacinth control in South Africa: a case study of three options	Van Wyk,E., Van Wilgen, B.W.	The aquatic plant water hyacinth (Eichhornia crassipes) was first recorded in South Africa during the early part of the 20th century. The plant has since spread across the country and is found in water bodies in both sub-tropical and temperate areas. The biology, ecology and impacts of water hyacinth are well studied, but sound and cost-effective management of it remains an enormous challenge in …	2002	English	Peer-reviewed article	NA	Yes	Plantae	Tracheophyta	Liliopsida	Pontederiales	Pontederiaceae	Eichhornia	Eichhornia crassipes	NA	water hyacinth	Aquatic	aquatic	N	NA	11	N	Africa	South Africa	NA	Nseleni System, Kwazulu-natal	Site	1989	Year	1989	1989	1989	1989	One-time	11986.3	NA	NA	5315.79	9520.6	11986.3	5315.79	9520.6	ZAR	1995	Effective
344	SC432	GS	VanWyk2002	The cost of water hyacinth control in South Africa: a case study of three options	Van Wyk,E., Van Wilgen, B.W.	The aquatic plant water hyacinth (Eichhornia crassipes) was first recorded in South Africa during the early part of the 20th century. The plant has since spread across the country and is found in water bodies in both sub-tropical and temperate areas. The biology, ecology and impacts of water hyacinth are well studied, but sound and cost-effective management of it remains an enormous challenge in …	2002	English	Peer-reviewed article	NA	Yes	Plantae	Tracheophyta	Liliopsida	Pontederiales	Pontederiaceae	Eichhornia	Eichhornia crassipes	NA	water hyacinth	Aquatic	aquatic	N	NA	11	N	Africa	South Africa	NA	New Yearâ€™s Dam	Site	1999	Year	1999	1999	1999	1999	One-time	12519.6	NA	NA	5552.3	9944.18	12519.6	5552.3	9944.18	ZAR	1995	Effective
345	SC433	GS	VanWyk2002	The cost of water hyacinth control in South Africa: a case study of three options	Van Wyk,E., Van Wilgen, B.W.	The aquatic plant water hyacinth (Eichhornia crassipes) was first recorded in South Africa during the early part of the 20th century. The plant has since spread across the country and is found in water bodies in both sub-tropical and temperate areas. The biology, ecology and impacts of water hyacinth are well studied, but sound and cost-effective management of it remains an enormous challenge in …	2002	English	Peer-reviewed article	NA	Yes	Plantae	Tracheophyta	Liliopsida	Pontederiales	Pontederiaceae	Eichhornia	Eichhornia crassipes	NA	water hyacinth	Aquatic	aquatic	N	NA	11	N	Africa	South Africa	NA	New Yearâ€™s Dam	Site	2000	Year	2000	2000	2000	2000	One-time	12519.6	NA	NA	5552.3	9944.18	12519.6	5552.3	9944.18	ZAR	1995	Effective
346	SC439	GS	VanWyk2002	The cost of water hyacinth control in South Africa: a case study of three options	Van Wyk,E., Van Wilgen, B.W.	The aquatic plant water hyacinth (Eichhornia crassipes) was first recorded in South Africa during the early part of the 20th century. The plant has since spread across the country and is found in water bodies in both sub-tropical and temperate areas. The biology, ecology and impacts of water hyacinth are well studied, but sound and cost-effective management of it remains an enormous challenge in …	2002	English	Peer-reviewed article	NA	Yes	Plantae	Tracheophyta	Liliopsida	Pontederiales	Pontederiaceae	Eichhornia	Eichhornia crassipes	NA	water hyacinth	Aquatic	aquatic	N	NA	11	N	Africa	South Africa	NA	Nseleni System, Kwazulu-natal	Site	1988	Year	1988	1988	1988	1988	One-time	13806.7	NA	NA	6123.12	10966.5	13806.7	6123.12	10966.5	ZAR	1995	Effective
347	SC443	NA	Leavold2007	Development of case studies on the economic impacts of invasive species in Africa: Salvinia molesta	Leavold, V. Lloyd, L. and Lepetit, J.	This report details the results of an extensive desktop study to quantify the economic impacts of an invasive weed species in Africa. Salvinia molesta (Salvinia) is a floating water weed found in the lower Senegal River delta in Senegal. Salvinia reproduces vegetatively, is easily spread by flowing water as well as by stock, vehicles and water craft. The plant forms a thick mat on the waterâ€™s s…	2007	English	Peer-reviewed article	Chikwenhere and Keswani, 1997	Yes	Plantae	Tracheophyta	Polypodiopsida	Salviniales	Salviniaceae	Salvinia	Salvinia molesta	NA	Kariba weed	Aquatic	aquatic	N	NA	NA	N	Africa	Zimbabwe	NA	Zimbabwe	Unit (16 ha)	1990	Period	1990	1990	1990	1990	One-time	14038	NA	NA	1.07295e+07	57229.8	14038	1.07295e+07	57229.8	ZWL	1990	Effective
348	SC459	GS	VanWyk2002	The cost of water hyacinth control in South Africa: a case study of three options	Van Wyk,E., Van Wilgen, B.W.	The aquatic plant water hyacinth (Eichhornia crassipes) was first recorded in South Africa during the early part of the 20th century. The plant has since spread across the country and is found in water bodies in both sub-tropical and temperate areas. The biology, ecology and impacts of water hyacinth are well studied, but sound and cost-effective management of it remains an enormous challenge in …	2002	English	Peer-reviewed article	NA	Yes	Plantae	Tracheophyta	Liliopsida	Pontederiales	Pontederiaceae	Eichhornia	Eichhornia crassipes	NA	water hyacinth	Aquatic	aquatic	N	NA	11	N	Africa	South Africa	NA	Nseleni System, Kwazulu-natal	Site	1987	Year	1987	1987	1987	1987	One-time	15625	NA	NA	6929.51	12410.8	15625	6929.51	12410.8	ZAR	1995	Effective
349	SC470	GS	VanWyk2002	The cost of water hyacinth control in South Africa: a case study of three options	Van Wyk,E., Van Wilgen, B.W.	The aquatic plant water hyacinth (Eichhornia crassipes) was first recorded in South Africa during the early part of the 20th century. The plant has since spread across the country and is found in water bodies in both sub-tropical and temperate areas. The biology, ecology and impacts of water hyacinth are well studied, but sound and cost-effective management of it remains an enormous challenge in …	2002	English	Peer-reviewed article	NA	Yes	Plantae	Tracheophyta	Liliopsida	Pontederiales	Pontederiaceae	Eichhornia	Eichhornia crassipes	NA	water hyacinth	Aquatic	aquatic	N	NA	11	N	Africa	South Africa	NA	Nseleni System, Kwazulu-natal	Site	2000	Year	2000	2000	2000	2000	One-time	17466.7	NA	NA	7746.29	13873.6	17466.7	7746.29	13873.6	ZAR	1995	Effective
350	SC472	GS	VanWyk2002	The cost of water hyacinth control in South Africa: a case study of three options	Van Wyk,E., Van Wilgen, B.W.	The aquatic plant water hyacinth (Eichhornia crassipes) was first recorded in South Africa during the early part of the 20th century. The plant has since spread across the country and is found in water bodies in both sub-tropical and temperate areas. The biology, ecology and impacts of water hyacinth are well studied, but sound and cost-effective management of it remains an enormous challenge in …	2002	English	Peer-reviewed article	NA	Yes	Plantae	Tracheophyta	Liliopsida	Pontederiales	Pontederiaceae	Eichhornia	Eichhornia crassipes	NA	water hyacinth	Aquatic	aquatic	N	NA	11	N	Africa	South Africa	NA	Nseleni System, Kwazulu-natal	Site	1986	Year	1986	1986	1986	1986	One-time	17811.7	NA	NA	7899.29	14147.7	17811.7	7899.29	14147.7	ZAR	1995	Effective
351	SC473	GS	VanWyk2002	The cost of water hyacinth control in South Africa: a case study of three options	Van Wyk,E., Van Wilgen, B.W.	The aquatic plant water hyacinth (Eichhornia crassipes) was first recorded in South Africa during the early part of the 20th century. The plant has since spread across the country and is found in water bodies in both sub-tropical and temperate areas. The biology, ecology and impacts of water hyacinth are well studied, but sound and cost-effective management of it remains an enormous challenge in …	2002	English	Peer-reviewed article	NA	Yes	Plantae	Tracheophyta	Liliopsida	Pontederiales	Pontederiaceae	Eichhornia	Eichhornia crassipes	NA	water hyacinth	Aquatic	aquatic	N	NA	11	N	Africa	South Africa	NA	Nseleni System, Kwazulu-natal	Site	1997	Year	1997	1997	1997	1997	One-time	17956.9	NA	NA	7963.69	14263	17956.9	7963.69	14263	ZAR	1995	Effective
352	SC484	GS	VanWyk2002	The cost of water hyacinth control in South Africa: a case study of three options	Van Wyk,E., Van Wilgen, B.W.	The aquatic plant water hyacinth (Eichhornia crassipes) was first recorded in South Africa during the early part of the 20th century. The plant has since spread across the country and is found in water bodies in both sub-tropical and temperate areas. The biology, ecology and impacts of water hyacinth are well studied, but sound and cost-effective management of it remains an enormous challenge in …	2002	English	Peer-reviewed article	NA	Yes	Plantae	Tracheophyta	Liliopsida	Pontederiales	Pontederiaceae	Eichhornia	Eichhornia crassipes	NA	water hyacinth	Aquatic	aquatic	N	NA	11	N	Africa	South Africa	NA	Nseleni System, Kwazulu-natal	Site	1999	Year	1999	1999	1999	1999	One-time	19334.1	NA	NA	8574.48	15356.9	19334.1	8574.48	15356.9	ZAR	1995	Effective
353	SC485	GS	VanWyk2002	The cost of water hyacinth control in South Africa: a case study of three options	Van Wyk,E., Van Wilgen, B.W.	The aquatic plant water hyacinth (Eichhornia crassipes) was first recorded in South Africa during the early part of the 20th century. The plant has since spread across the country and is found in water bodies in both sub-tropical and temperate areas. The biology, ecology and impacts of water hyacinth are well studied, but sound and cost-effective management of it remains an enormous challenge in …	2002	English	Peer-reviewed article	NA	Yes	Plantae	Tracheophyta	Liliopsida	Pontederiales	Pontederiaceae	Eichhornia	Eichhornia crassipes	NA	water hyacinth	Aquatic	aquatic	N	NA	11	N	Africa	South Africa	NA	Nseleni System, Kwazulu-natal	Site	1996	Year	1996	1996	1996	1996	One-time	19564.7	NA	NA	8676.73	15540	19564.7	8676.73	15540	ZAR	1995	Effective
354	SC493	NA	vanWilgen2017	An assessment of the evolution, costs and effectiveness of alien plant control operations in Kruger National Park, South Africa	van Wilgen, B.W., Fill, J.M., Govender, N., Foxcroft, L.C.	Alien plants were first recorded in 1937 in the 2 million ha Kruger National Park (KNP, a savanna protected area in South Africa), and attempts to control them began in the mid-1950s. The invasive alien plant control program expanded substantially in the late 1990s, but its overall efficacy has not been determined. We present an assessment of invasive alien plant control operations over several d…	2017	English	Peer-reviewed article	NA	Yes	Plantae	Tracheophyta	Magnoliopsida	Caryophyllales	Cactaceae	Cylindropuntia	Cylindropuntia imbricata	NA	Tree cholla	Terrestrial	terrestrial	N	NA	4	Y	Africa	South Africa	NA	Kruger National Park	Site	1997-2016	Period	1997	2016	1997	2016	Potentially ongoing	20000	NA	NA	1388.62	3473.24	1000	69.4309	173.662	ZAR	2016	Effective
355	SC496	NA	Currie2009	Cost-benefit analysis of alien vegetation clearing for water yield and tourism in a mountain catchment in the Western Cape of South Africa	Currie B Milton SJ Steenkamp JC	Economic analysis is used to assess the costs and benefits of restoration following clearing of invasive alien trees in the floristically rich Fynbos mountainous area near Franschhoek, Western Cape of South Africa. The Groot Drakenstein, Franschhoek and Jonkershoek mountains receives more rainfall than the surrounding areas and is an important source of water for the city of Cape Town. The costs …	2009	English	Peer-reviewed article	NA	Yes	Plantae	Tracheophyta	Magnoliopsida	Diverse/Unspecified	Diverse/Unspecified	Diverse/Unspecified	Diverse/Unspecified	NA	Trees (Acacias and pines)	Terrestrial	terrestrial	N	Fynbos	3	N	Africa	South Africa	NA	Assegaaibos Mountain Catchment	Site	1996	Period	1996	1996	1996	1996	One-time	20150	NA	NA	24500.8	46029.3	20150	24500.8	46029.3	USD	2006	Effective
356	SC501	GS	VanWyk2002	The cost of water hyacinth control in South Africa: a case study of three options	Van Wyk,E., Van Wilgen, B.W.	The aquatic plant water hyacinth (Eichhornia crassipes) was first recorded in South Africa during the early part of the 20th century. The plant has since spread across the country and is found in water bodies in both sub-tropical and temperate areas. The biology, ecology and impacts of water hyacinth are well studied, but sound and cost-effective management of it remains an enormous challenge in …	2002	English	Peer-reviewed article	NA	Yes	Plantae	Tracheophyta	Liliopsida	Pontederiales	Pontederiaceae	Eichhornia	Eichhornia crassipes	NA	water hyacinth	Aquatic	aquatic	N	NA	11	N	Africa	South Africa	NA	New Yearâ€™s Dam	Site	2001	Year	2001	2001	2001	2001	One-time	21586	NA	NA	9573.15	17145.5	21586	9573.15	17145.5	ZAR	1995	Effective
357	SC508	GS	VanWyk2002	The cost of water hyacinth control in South Africa: a case study of three options	Van Wyk,E., Van Wilgen, B.W.	The aquatic plant water hyacinth (Eichhornia crassipes) was first recorded in South Africa during the early part of the 20th century. The plant has since spread across the country and is found in water bodies in both sub-tropical and temperate areas. The biology, ecology and impacts of water hyacinth are well studied, but sound and cost-effective management of it remains an enormous challenge in …	2002	English	Peer-reviewed article	NA	Yes	Plantae	Tracheophyta	Liliopsida	Pontederiales	Pontederiaceae	Eichhornia	Eichhornia crassipes	NA	water hyacinth	Aquatic	aquatic	N	NA	11	N	Africa	South Africa	NA	Hartbeespoort Dam	Site	1998	Year	1998	1998	1998	1998	One-time	22461	NA	NA	9961.21	17840.6	22461	9961.21	17840.6	ZAR	1995	Effective
358	SC515	GS	VanWyk2002	The cost of water hyacinth control in South Africa: a case study of three options	Van Wyk,E., Van Wilgen, B.W.	The aquatic plant water hyacinth (Eichhornia crassipes) was first recorded in South Africa during the early part of the 20th century. The plant has since spread across the country and is found in water bodies in both sub-tropical and temperate areas. The biology, ecology and impacts of water hyacinth are well studied, but sound and cost-effective management of it remains an enormous challenge in …	2002	English	Peer-reviewed article	NA	Yes	Plantae	Tracheophyta	Liliopsida	Pontederiales	Pontederiaceae	Eichhornia	Eichhornia crassipes	NA	water hyacinth	Aquatic	aquatic	N	NA	11	N	Africa	South Africa	NA	Nseleni System, Kwazulu-natal	Site	1995	Year	1995	1995	1995	1995	One-time	23779.5	NA	NA	10546	18887.9	23779.5	10546	18887.9	ZAR	1995	Effective
359	SC517	GS	VanWyk2002	The cost of water hyacinth control in South Africa: a case study of three options	Van Wyk,E., Van Wilgen, B.W.	The aquatic plant water hyacinth (Eichhornia crassipes) was first recorded in South Africa during the early part of the 20th century. The plant has since spread across the country and is found in water bodies in both sub-tropical and temperate areas. The biology, ecology and impacts of water hyacinth are well studied, but sound and cost-effective management of it remains an enormous challenge in …	2002	English	Peer-reviewed article	NA	Yes	Plantae	Tracheophyta	Liliopsida	Pontederiales	Pontederiaceae	Eichhornia	Eichhornia crassipes	NA	water hyacinth	Aquatic	aquatic	N	NA	11	N	Africa	South Africa	NA	Nseleni System, Kwazulu-natal	Site	1991	Year	1991	1991	1991	1991	One-time	24485.9	NA	NA	10859.2	19448.9	24485.9	10859.2	19448.9	ZAR	1995	Effective
360	SC519	NA	Hosking2002	Evaluating the environmental use of water - Selected case studies in the eastern and southern cape	Hosking SG; du Preez M; Campbell E.E; Wooldrige T.H. & du Plessis L.L.	South Africa is a drought-prone, water-poor region (Burgers, Marais & Bekker 1995:101). It has a mean annual rainfall of only 502mm and a mean annual runoff of only 42mm (420m3/ha/a) and for these reasons it seems very probable that water shortages will limit economic development in South Africa during the Twenty-first century (Briers & Powell 1993:1). Consequently, it is imperative that its wate…	2002	English	Official report	NA	Yes	Plantae	Tracheophyta	Magnoliopsida	Diverse/Unspecified	Diverse/Unspecified	Diverse/Unspecified	Diverse/Unspecified	NA	Trees (Acacias, pines, hakeas and populus)	Terrestrial	terrestrial	N	South-Eastern mountain grassland	4	N	Africa	South Africa	NA	Pott River	Site	Approximately between 2004 and 2013	Year	2002	2011	2002	2011	Potentially ongoing	24500	NA	NA	3167.39	10525.8	24500	3167.39	10525.8	ZAR	2002	Publication year
361	SC520	GS	VanWyk2002	The cost of water hyacinth control in South Africa: a case study of three options	Van Wyk,E., Van Wilgen, B.W.	The aquatic plant water hyacinth (Eichhornia crassipes) was first recorded in South Africa during the early part of the 20th century. The plant has since spread across the country and is found in water bodies in both sub-tropical and temperate areas. The biology, ecology and impacts of water hyacinth are well studied, but sound and cost-effective management of it remains an enormous challenge in …	2002	English	Peer-reviewed article	NA	Yes	Plantae	Tracheophyta	Liliopsida	Pontederiales	Pontederiaceae	Eichhornia	Eichhornia crassipes	NA	water hyacinth	Aquatic	aquatic	N	NA	11	N	Africa	South Africa	NA	Nseleni System, Kwazulu-natal	Site	1998	Year	1998	1998	1998	1998	One-time	24632.6	NA	NA	10924.3	19565.5	24632.6	10924.3	19565.5	ZAR	1995	Effective
362	SC522	GS	VanWyk2002	The cost of water hyacinth control in South Africa: a case study of three options	Van Wyk,E., Van Wilgen, B.W.	The aquatic plant water hyacinth (Eichhornia crassipes) was first recorded in South Africa during the early part of the 20th century. The plant has since spread across the country and is found in water bodies in both sub-tropical and temperate areas. The biology, ecology and impacts of water hyacinth are well studied, but sound and cost-effective management of it remains an enormous challenge in …	2002	English	Peer-reviewed article	NA	Yes	Plantae	Tracheophyta	Liliopsida	Pontederiales	Pontederiaceae	Eichhornia	Eichhornia crassipes	NA	water hyacinth	Aquatic	aquatic	N	NA	11	N	Africa	South Africa	NA	New Yearâ€™s Dam	Site	1996	Year	1996	1996	1996	1996	One-time	24779.2	NA	NA	10989.3	19681.9	24779.2	10989.3	19681.9	ZAR	1995	Effective
363	SC525	NA	vanWilgen1997	The sustainable development of water resources: History, financial costs, and benefits of alien plant control programmes	van Wilgen, B. W. Little, P. R., Chapman, R.A., Gorgens, A.H.M., Willems, T. and Marais, C.	The water resources of the Western Cape province, and the catchment areas that produce them, need to be carefully managed if future demands for water are to be met. Good catchment management, in the form of programmes to control alien invasive plants. provides an additional means for preventing losses of water, but needs to be justified financially. Previous programmes aimed at the control of ali…	1997	English	Peer-reviewed article	NA	Yes	Plantae	Tracheophyta	Magnoliopsida/Pinopsida	Pinales/Proteales	Pinaceae/Proteaceae	Pinus/Hakea	Pinus sp./Hakea sp.	NA	NA	Terrestrial	terrestrial	N	NA	NA	N	Africa	South Africa	NA	Skuifraam	Unit (5041 ha)	2007	Year	2007	2040	2007	2040	Potentially ongoing	25000	NA	NA	8284.93	16758.1	25000	8284.93	16758.1	ZAR	1997	Publication year
364	SC529	GS	VanWyk2002	The cost of water hyacinth control in South Africa: a case study of three options	Van Wyk,E., Van Wilgen, B.W.	The aquatic plant water hyacinth (Eichhornia crassipes) was first recorded in South Africa during the early part of the 20th century. The plant has since spread across the country and is found in water bodies in both sub-tropical and temperate areas. The biology, ecology and impacts of water hyacinth are well studied, but sound and cost-effective management of it remains an enormous challenge in …	2002	English	Peer-reviewed article	NA	Yes	Plantae	Tracheophyta	Liliopsida	Pontederiales	Pontederiaceae	Eichhornia	Eichhornia crassipes	NA	water hyacinth	Aquatic	aquatic	N	NA	11	N	Africa	South Africa	NA	Nseleni System, Kwazulu-natal	Site	1992	Year	1992	1992	1992	1992	One-time	25827.5	NA	NA	11454.2	20514.5	25827.5	11454.2	20514.5	ZAR	1995	Effective
365	SC530	GS	VanWyk2002	The cost of water hyacinth control in South Africa: a case study of three options	Van Wyk,E., Van Wilgen, B.W.	The aquatic plant water hyacinth (Eichhornia crassipes) was first recorded in South Africa during the early part of the 20th century. The plant has since spread across the country and is found in water bodies in both sub-tropical and temperate areas. The biology, ecology and impacts of water hyacinth are well studied, but sound and cost-effective management of it remains an enormous challenge in …	2002	English	Peer-reviewed article	NA	Yes	Plantae	Tracheophyta	Liliopsida	Pontederiales	Pontederiaceae	Eichhornia	Eichhornia crassipes	NA	water hyacinth	Aquatic	aquatic	N	NA	11	N	Africa	South Africa	NA	Hartbeespoort Dam	Site	1981	Year	1981	1981	1981	1981	One-time	26519	NA	NA	11760.9	21063.8	26519	11760.9	21063.8	ZAR	1995	Effective
366	SC545	NA	Vogele1991	Biological control of the fruit tree mealybugÂ Rastrococcus invadensÂ Williams in Togo: A preliminary sociological and economic evaluation	VÃ¶gele, J.M., Agounke, D., Moore, D.	The fruit tree mealybugÂ Rastrococcus invadensÂ Williams, accidentally introduced into the West African region in the early 1980s, has been the subject of a successful biological control programme in Togo and elsewhere in West Africa. It is now kept at low population densities by the introduced specific parasitoidÂ Gyranusoidea tebygiÂ Noyes. The sociological and economic impact of this successfu…	1991	English	Peer-reviewed article	NA	Yes	Animalia	Arthropoda	Insecta	Hemiptera	Pseudococcidae	Rastrococcus	Rastrococcus invadens	NA	Fruit tree mealybug	Terrestrial	terrestrial	N	NA	12b	N	Africa	Togo	NA	Togo	Country	1989	Year	1989	1989	1989	1989	One-time	30150	NA	NA	59615.7	NA	30150	59615.7	NA	USD	1989	Effective
367	SC550	GS	VanWyk2002	The cost of water hyacinth control in South Africa: a case study of three options	Van Wyk,E., Van Wilgen, B.W.	The aquatic plant water hyacinth (Eichhornia crassipes) was first recorded in South Africa during the early part of the 20th century. The plant has since spread across the country and is found in water bodies in both sub-tropical and temperate areas. The biology, ecology and impacts of water hyacinth are well studied, but sound and cost-effective management of it remains an enormous challenge in …	2002	English	Peer-reviewed article	NA	Yes	Plantae	Tracheophyta	Liliopsida	Pontederiales	Pontederiaceae	Eichhornia	Eichhornia crassipes	NA	water hyacinth	Aquatic	aquatic	N	NA	11	N	Africa	South Africa	NA	New Yearâ€™s Dam	Site	1999	Year	1999	1999	1999	1999	One-time	31134	NA	NA	13807.6	24729.4	31134	13807.6	24729.4	ZAR	1995	Effective
368	SC559	NA	Riddin2016	The rise and fall of an invasive estuarine grass	Riddin, T., van Wyk, E. and Adams, J.	Spartina alterniflora Loisel. is the only known halophyte that is invasive in intertidal salt marsh habitats in South Africa and it poses a considerable threat to the biodiversity of nearby estuaries. First detected in 2004, regular chemical treatment during the growing period from 2013 and adjustments to the recommended herbicide mix has almost completely removed the plant from the Great Brak Es…	2016	English	Peer-reviewed article	NA	Yes	Plantae	Tracheophyta	Liliopsida	Poales	Poaceae	Sporobolus	Sporobolus alterniflorus	NA	Smooth cordgrass	Aquatic	semi-aquatic	N	NA	NA	N	Africa	South Africa	NA	Wyoming	Unit (10.221 m2)	2013â€“2014	Year	2013	2014	2013	2014	Potentially ongoing	33502	NA	NA	2326.07	5818.03	33502	2326.07	5818.03	ZAR	2016	Publication year
369	SC564	NA	Riddin2016	The rise and fall of an invasive estuarine grass	Riddin, T., van Wyk, E. and Adams, J.	Spartina alterniflora Loisel. is the only known halophyte that is invasive in intertidal salt marsh habitats in South Africa and it poses a considerable threat to the biodiversity of nearby estuaries. First detected in 2004, regular chemical treatment during the growing period from 2013 and adjustments to the recommended herbicide mix has almost completely removed the plant from the Great Brak Es…	2016	English	Peer-reviewed article	NA	Yes	Plantae	Tracheophyta	Liliopsida	Poales	Poaceae	Sporobolus	Sporobolus alterniflorus	NA	Smooth cordgrass	Aquatic	semi-aquatic	N	NA	NA	N	Africa	South Africa	NA	South Dakota	Unit (10.221 m2)	2013â€“2013	Year	2013	2013	2013	2013	Potentially ongoing	34592	NA	NA	2401.75	6007.32	34592	2401.75	6007.32	ZAR	2016	Publication year
370	SC566	NA	Riddin2016	The rise and fall of an invasive estuarine grass	Riddin, T., van Wyk, E. and Adams, J.	Spartina alterniflora Loisel. is the only known halophyte that is invasive in intertidal salt marsh habitats in South Africa and it poses a considerable threat to the biodiversity of nearby estuaries. First detected in 2004, regular chemical treatment during the growing period from 2013 and adjustments to the recommended herbicide mix has almost completely removed the plant from the Great Brak Es…	2016	English	Peer-reviewed article	NA	Yes	Plantae	Tracheophyta	Liliopsida	Poales	Poaceae	Sporobolus	Sporobolus alterniflorus	NA	Smooth cordgrass	Aquatic	semi-aquatic	N	NA	NA	N	Africa	South Africa	NA	Great Brak Estuary	Unit (10.221 m2)	2014â€“2015	Year	2014	2015	2014	2015	Potentially ongoing	34953	NA	NA	2426.82	6070.02	34953	2426.82	6070.02	ZAR	2016	Publication year
371	SC568	WoS	Witt2020	A preliminary analysis of the costs and benefits of the biological control agent Dactylopius opuntiae on Opuntia stricta in Laikipia County, Kenya Arne	Witt et al.	Opuntia strictaÂ (Haw.) Haw (Cactaceae) is invasive in Laikipia County, Kenya, impacting negatively on biodiversity and livelihoods. To control this invasive plant the biocontrol agentÂ Dactylopius opuntiaeÂ (Cockerell) (Hemiptera; Dactylopiidae) â€˜strictaâ€™ biotype was released in 2014. A preliminary once-off survey to determine the impact of the cochineal revealed that it had contributed to a…	2020	English	Peer-reviewed article	NA	Yes	Plantae	Tracheophyta	Magnoliopsida	Caryophyllales	Cactaceae	Opuntia	Opuntia stricta	NA	Erect prickly pear	Terrestrial	terrestrial	N	A mix of grasslands, savannah woodland, and forest lying between the Aberdare Mountains to the south and southwest, Mount Kenya to the east and southeast, Eastern (Gregory) Rift Valley to the west, Karisia Hills to the north-west, Mathews Range to the north, and Samburu National Reserve to the northeast	1\2\4	N	Africa	Kenya	NA	Laikipia	Site	During 3 years	Period	2014	NA	2014	2016	One-time	35000	NA	NA	36239.4	78965	11666.7	12079.8	26321.7	USD	2014	Effective
372	SC572	GS	VanWyk2002	The cost of water hyacinth control in South Africa: a case study of three options	Van Wyk,E., Van Wilgen, B.W.	The aquatic plant water hyacinth (Eichhornia crassipes) was first recorded in South Africa during the early part of the 20th century. The plant has since spread across the country and is found in water bodies in both sub-tropical and temperate areas. The biology, ecology and impacts of water hyacinth are well studied, but sound and cost-effective management of it remains an enormous challenge in …	2002	English	Peer-reviewed article	NA	Yes	Plantae	Tracheophyta	Liliopsida	Pontederiales	Pontederiaceae	Eichhornia	Eichhornia crassipes	NA	water hyacinth	Aquatic	aquatic	N	NA	11	N	Africa	South Africa	NA	Nseleni System, Kwazulu-natal	Site	1994	Year	1994	1994	1994	1994	One-time	35414.8	NA	NA	15706.1	28129.6	35414.8	15706.1	28129.6	ZAR	1995	Effective
373	SC576	GS	VanWyk2002	The cost of water hyacinth control in South Africa: a case study of three options	Van Wyk,E., Van Wilgen, B.W.	The aquatic plant water hyacinth (Eichhornia crassipes) was first recorded in South Africa during the early part of the 20th century. The plant has since spread across the country and is found in water bodies in both sub-tropical and temperate areas. The biology, ecology and impacts of water hyacinth are well studied, but sound and cost-effective management of it remains an enormous challenge in …	2002	English	Peer-reviewed article	NA	Yes	Plantae	Tracheophyta	Liliopsida	Pontederiales	Pontederiaceae	Eichhornia	Eichhornia crassipes	NA	water hyacinth	Aquatic	aquatic	N	NA	11	N	Africa	South Africa	NA	Nseleni System, Kwazulu-natal	Site	1993	Year	1993	1993	1993	1993	One-time	36002.7	NA	NA	15966.8	28596.6	36002.7	15966.8	28596.6	ZAR	1995	Effective
374	SC578	TC	EMTC_18	South African experience regarding alien species: impacts and control	Huntley et al	NA	1996	English	Book chapter	NA	Yes	Animalia	Chordata	Mammalia	Carnivora	Felidae	Felis	Felis domesticus	NA	NA	Terrestrial	terrestrial	N	NA	NA	N	Africa	South Africa	NA	Marion Island	Country	1991-1992	Year	1991	1992	1991	1992	One-time	36339	NA	NA	13208.8	26463.1	36339	13208.8	26463.1	ZAR	1996	Effective
375	SC579	NA	Vogele1991	Biological control of the fruit tree mealybugÂ Rastrococcus invadensÂ Williams in Togo: A preliminary sociological and economic evaluation	VÃ¶gele, J.M., Agounke, D., Moore, D.	The fruit tree mealybugÂ Rastrococcus invadensÂ Williams, accidentally introduced into the West African region in the early 1980s, has been the subject of a successful biological control programme in Togo and elsewhere in West Africa. It is now kept at low population densities by the introduced specific parasitoidÂ Gyranusoidea tebygiÂ Noyes. The sociological and economic impact of this successfu…	1991	English	Peer-reviewed article	NA	Yes	Animalia	Arthropoda	Insecta	Hemiptera	Pseudococcidae	Rastrococcus	Rastrococcus invadens	NA	Fruit tree mealybug	Terrestrial	terrestrial	N	NA	12b	N	Africa	Togo	NA	Togo	Country	1988	Year	1988	1988	1988	1988	One-time	37450	NA	NA	77624.4	NA	37450	77624.4	NA	USD	1988	Effective
376	SC580	GS	VanWyk2002	The cost of water hyacinth control in South Africa: a case study of three options	Van Wyk,E., Van Wilgen, B.W.	The aquatic plant water hyacinth (Eichhornia crassipes) was first recorded in South Africa during the early part of the 20th century. The plant has since spread across the country and is found in water bodies in both sub-tropical and temperate areas. The biology, ecology and impacts of water hyacinth are well studied, but sound and cost-effective management of it remains an enormous challenge in …	2002	English	Peer-reviewed article	NA	Yes	Plantae	Tracheophyta	Liliopsida	Pontederiales	Pontederiaceae	Eichhornia	Eichhornia crassipes	NA	water hyacinth	Aquatic	aquatic	N	NA	11	N	Africa	South Africa	NA	Hartbeespoort Dam	Site	1992	Year	1992	1992	1992	1992	One-time	37572	NA	NA	16662.8	29843.1	37572	16662.8	29843.1	ZAR	1995	Effective
377	SC586	GS	VanWyk2002	The cost of water hyacinth control in South Africa: a case study of three options	Van Wyk,E., Van Wilgen, B.W.	The aquatic plant water hyacinth (Eichhornia crassipes) was first recorded in South Africa during the early part of the 20th century. The plant has since spread across the country and is found in water bodies in both sub-tropical and temperate areas. The biology, ecology and impacts of water hyacinth are well studied, but sound and cost-effective management of it remains an enormous challenge in …	2002	English	Peer-reviewed article	NA	Yes	Plantae	Tracheophyta	Liliopsida	Pontederiales	Pontederiaceae	Eichhornia	Eichhornia crassipes	NA	water hyacinth	Aquatic	aquatic	N	NA	11	N	Africa	South Africa	NA	Hartbeespoort Dam	Site	1991	Year	1991	1991	1991	1991	One-time	38226	NA	NA	16952.8	30362.5	38226	16952.8	30362.5	ZAR	1995	Effective
378	SC599	TC	Alimi1990	An economic analysis of water hyacinth control methods in Nigeria	Alimi, Akinyemiju	[FIRST PAGE OF TEXT] INTRODUCTION The status of water hyacinth (Eichhornia crassipes (Mart.) Solms)) in Nigerian waters was recently reviewed by Akinyemiju (1). Since then, the publicity created by the nationâ€™s press resulted in the government initiating manual and mechanical harvesting for control. However, these ef- forts have not yielded sufficient success and it is necessary to find other c…	1990	English	Peer-reviewed article	NA	Yes	Plantae	Tracheophyta	Liliopsida	Commelinales	Pontederiaceae	Eichhornia	Eichhornia crassipes	NA	water hyacinth	Aquatic	aquatic	N	NA	11	N	Africa	Nigeria	NA	NA	Unit (km2)	NA	Year	NA	NA	1990	1990	Potentially ongoing	41567.2	14600	151228	9701.26	32736.4	41567.2	9701.26	32736.4	NGN	1990	Publication year
379	SC607	NA	vanWilgen2017	An assessment of the evolution, costs and effectiveness of alien plant control operations in Kruger National Park, South Africa	van Wilgen, B.W., Fill, J.M., Govender, N., Foxcroft, L.C.	Alien plants were first recorded in 1937 in the 2 million ha Kruger National Park (KNP, a savanna protected area in South Africa), and attempts to control them began in the mid-1950s. The invasive alien plant control program expanded substantially in the late 1990s, but its overall efficacy has not been determined. We present an assessment of invasive alien plant control operations over several d…	2017	English	Peer-reviewed article	NA	Yes	Plantae	Tracheophyta	Magnoliopsida	Gentianales	Apocynaceae	Nerium	Nerium oleander	NA	Oleander	Terrestrial	terrestrial	N	NA	4	Y	Africa	South Africa	NA	Kruger National Park	Site	1997-2016	Period	1997	2016	1997	2016	Potentially ongoing	43000	NA	NA	2985.53	7467.48	2150	149.276	373.374	ZAR	2016	Effective
380	SC618	NA	Vogele1991	Biological control of the fruit tree mealybugÂ Rastrococcus invadensÂ Williams in Togo: A preliminary sociological and economic evaluation	VÃ¶gele, J.M., Agounke, D., Moore, D.	The fruit tree mealybugÂ Rastrococcus invadensÂ Williams, accidentally introduced into the West African region in the early 1980s, has been the subject of a successful biological control programme in Togo and elsewhere in West Africa. It is now kept at low population densities by the introduced specific parasitoidÂ Gyranusoidea tebygiÂ Noyes. The sociological and economic impact of this successfu…	1991	English	Peer-reviewed article	NA	Yes	Animalia	Arthropoda	Insecta	Hemiptera	Pseudococcidae	Rastrococcus	Rastrococcus invadens	NA	Fruit tree mealybug	Terrestrial	terrestrial	N	NA	12b	N	Africa	Togo	NA	Togo	Country	1987	Year	1987	1987	1987	1987	One-time	45000	NA	NA	97077.1	NA	45000	97077.1	NA	USD	1987	Effective
381	SC629	NA	Hosking2002	Evaluating the environmental use of water - Selected case studies in the eastern and southern cape	Hosking SG; du Preez M; Campbell E.E; Wooldrige T.H. & du Plessis L.L.	South Africa is a drought-prone, water-poor region (Burgers, Marais & Bekker 1995:101). It has a mean annual rainfall of only 502mm and a mean annual runoff of only 42mm (420m3/ha/a) and for these reasons it seems very probable that water shortages will limit economic development in South Africa during the Twenty-first century (Briers & Powell 1993:1). Consequently, it is imperative that its wate…	2002	English	Official report	NA	Yes	Plantae	Tracheophyta	Magnoliopsida	Diverse/Unspecified	Diverse/Unspecified	Diverse/Unspecified	Diverse/Unspecified	NA	Trees (Acacias, pines, hakeas and populus)	Terrestrial	terrestrial	N	South-Eastern mountain grassland	4	N	Africa	South Africa	NA	Pott River	Site	Approximately between 2004 and 2013	Year	2002	2011	2002	2011	Potentially ongoing	49000	NA	NA	6334.79	21051.5	49000	6334.79	21051.5	ZAR	2002	Publication year
382	SC633	NA	Vogele1991	Biological control of the fruit tree mealybugÂ Rastrococcus invadensÂ Williams in Togo: A preliminary sociological and economic evaluation	VÃ¶gele, J.M., Agounke, D., Moore, D.	The fruit tree mealybugÂ Rastrococcus invadensÂ Williams, accidentally introduced into the West African region in the early 1980s, has been the subject of a successful biological control programme in Togo and elsewhere in West Africa. It is now kept at low population densities by the introduced specific parasitoidÂ Gyranusoidea tebygiÂ Noyes. The sociological and economic impact of this successfu…	1991	English	Peer-reviewed article	NA	Yes	Animalia	Arthropoda	Insecta	Hemiptera	Pseudococcidae	Rastrococcus	Rastrococcus invadens	NA	Fruit tree mealybug	Terrestrial	terrestrial	N	NA	12b	N	Africa	Togo	NA	Togo	Country	1986	Year	1986	1986	1986	1986	One-time	50000	NA	NA	111816	NA	50000	111816	NA	USD	1986	Effective
383	SC634	NA	vanWilgen2017	An assessment of the evolution, costs and effectiveness of alien plant control operations in Kruger National Park, South Africa	van Wilgen, B.W., Fill, J.M., Govender, N., Foxcroft, L.C.	Alien plants were first recorded in 1937 in the 2 million ha Kruger National Park (KNP, a savanna protected area in South Africa), and attempts to control them began in the mid-1950s. The invasive alien plant control program expanded substantially in the late 1990s, but its overall efficacy has not been determined. We present an assessment of invasive alien plant control operations over several d…	2017	English	Peer-reviewed article	NA	Yes	Plantae	Tracheophyta	Magnoliopsida	Malpighiales	Passifloraceae	Passiflora	Passiflora sp.	NA	Banana poka	Terrestrial	terrestrial	N	NA	4	Y	Africa	South Africa	NA	Kruger National Park	Site	1997-2016	Period	1997	2016	1997	2016	Potentially ongoing	50000	NA	NA	3471.54	8683.11	2500	173.577	434.156	ZAR	2016	Effective
384	SC641	NA	Currie2009	Cost-benefit analysis of alien vegetation clearing for water yield and tourism in a mountain catchment in the Western Cape of South Africa	Currie B Milton SJ Steenkamp JC	Economic analysis is used to assess the costs and benefits of restoration following clearing of invasive alien trees in the floristically rich Fynbos mountainous area near Franschhoek, Western Cape of South Africa. The Groot Drakenstein, Franschhoek and Jonkershoek mountains receives more rainfall than the surrounding areas and is an important source of water for the city of Cape Town. The costs …	2009	English	Peer-reviewed article	NA	Yes	Plantae	Tracheophyta	Magnoliopsida	Diverse/Unspecified	Diverse/Unspecified	Diverse/Unspecified	Diverse/Unspecified	NA	Trees (Acacias and pines)	Terrestrial	terrestrial	N	Fynbos	3	N	Africa	South Africa	NA	Assegaaibos Mountain Catchment	Site	1996-2004	Period	1996	2004	1996	2004	One-time	51047	NA	NA	62069.1	116608	5671.89	6896.57	12956.5	USD	2006	Effective
385	SC645	NA	vanWilgen2017	An assessment of the evolution, costs and effectiveness of alien plant control operations in Kruger National Park, South Africa	van Wilgen, B.W., Fill, J.M., Govender, N., Foxcroft, L.C.	Alien plants were first recorded in 1937 in the 2 million ha Kruger National Park (KNP, a savanna protected area in South Africa), and attempts to control them began in the mid-1950s. The invasive alien plant control program expanded substantially in the late 1990s, but its overall efficacy has not been determined. We present an assessment of invasive alien plant control operations over several d…	2017	English	Peer-reviewed article	NA	Yes	Plantae	Tracheophyta	Magnoliopsida	Gentianales	Apocynaceae	Thevetia	Thevetia peruviana	NA	Yellow oleander	Terrestrial	terrestrial	N	NA	4	Y	Africa	South Africa	NA	Kruger National Park	Site	1997-2016	Period	1997	2016	1997	2016	Potentially ongoing	53000	NA	NA	3679.84	9204.1	2650	183.992	460.205	ZAR	2016	Effective
386	SC648	NA	McConnachie2003	Economic evaluation of the successful biological control of Azolla filiculoides in South Africa	McConnachie, A.J., de Wit, M.T., Hill, M.P., Byrne, M.J.	Azolla filiculoides (red waterfern) is a floating fern native to South America which has invaded aquatic ecosystems in South Africa. Thick mats of A. filiculoides on dams and slow-moving water bodies cause economic losses to water-users. Affected waterusers were surveyed using a questionnaire to assess the importance of the weed. Among those most seriously affected were farming (71%), recreationa…	2003	English	Peer-reviewed article	NA	Yes	Plantae	Tracheophyta	Polypodiopsida	Salviniales	Salviniaceae	Azolla	Azolla filiculoides	NA	Red water fern	Aquatic	aquatic	N	NA	11	N	Africa	South Africa	NA	South Africa	Country	1995-2000	Period	1995	2000	1995	2000	One-time	54662	NA	NA	77809.1	198069	9110.33	12968.2	33011.4	USD	2000	Effective
387	SC652	GS	VanWyk2002	The cost of water hyacinth control in South Africa: a case study of three options	Van Wyk,E., Van Wilgen, B.W.	The aquatic plant water hyacinth (Eichhornia crassipes) was first recorded in South Africa during the early part of the 20th century. The plant has since spread across the country and is found in water bodies in both sub-tropical and temperate areas. The biology, ecology and impacts of water hyacinth are well studied, but sound and cost-effective management of it remains an enormous challenge in …	2002	English	Peer-reviewed article	NA	Yes	Plantae	Tracheophyta	Liliopsida	Pontederiales	Pontederiaceae	Eichhornia	Eichhornia crassipes	NA	water hyacinth	Aquatic	aquatic	N	NA	11	N	Africa	South Africa	NA	Hartbeespoort Dam	Site	1996	Year	1996	1996	1996	1996	One-time	55777	NA	NA	24736.5	44303.1	55777	24736.5	44303.1	ZAR	1995	Effective
388	SC653	GS	VanWyk2002	The cost of water hyacinth control in South Africa: a case study of three options	Van Wyk,E., Van Wilgen, B.W.	The aquatic plant water hyacinth (Eichhornia crassipes) was first recorded in South Africa during the early part of the 20th century. The plant has since spread across the country and is found in water bodies in both sub-tropical and temperate areas. The biology, ecology and impacts of water hyacinth are well studied, but sound and cost-effective management of it remains an enormous challenge in …	2002	English	Peer-reviewed article	NA	Yes	Plantae	Tracheophyta	Liliopsida	Pontederiales	Pontederiaceae	Eichhornia	Eichhornia crassipes	NA	water hyacinth	Aquatic	aquatic	N	NA	11	N	Africa	South Africa	NA	Hartbeespoort Dam	Site	1993	Year	1993	1993	1993	1993	One-time	56806	NA	NA	25192.8	45120.4	56806	25192.8	45120.4	ZAR	1995	Effective
389	SC654	GS	VanWyk2002	The cost of water hyacinth control in South Africa: a case study of three options	Van Wyk,E., Van Wilgen, B.W.	The aquatic plant water hyacinth (Eichhornia crassipes) was first recorded in South Africa during the early part of the 20th century. The plant has since spread across the country and is found in water bodies in both sub-tropical and temperate areas. The biology, ecology and impacts of water hyacinth are well studied, but sound and cost-effective management of it remains an enormous challenge in …	2002	English	Peer-reviewed article	NA	Yes	Plantae	Tracheophyta	Liliopsida	Pontederiales	Pontederiaceae	Eichhornia	Eichhornia crassipes	NA	water hyacinth	Aquatic	aquatic	N	NA	11	N	Africa	South Africa	NA	Hartbeespoort Dam	Site	1997	Year	1997	1997	1997	1997	One-time	56839	NA	NA	25207.5	45146.7	56839	25207.5	45146.7	ZAR	1995	Effective
390	SC668	GS	VanWyk2002	The cost of water hyacinth control in South Africa: a case study of three options	Van Wyk,E., Van Wilgen, B.W.	The aquatic plant water hyacinth (Eichhornia crassipes) was first recorded in South Africa during the early part of the 20th century. The plant has since spread across the country and is found in water bodies in both sub-tropical and temperate areas. The biology, ecology and impacts of water hyacinth are well studied, but sound and cost-effective management of it remains an enormous challenge in …	2002	English	Peer-reviewed article	NA	Yes	Plantae	Tracheophyta	Liliopsida	Pontederiales	Pontederiaceae	Eichhornia	Eichhornia crassipes	NA	water hyacinth	Aquatic	aquatic	N	NA	11	N	Africa	South Africa	NA	Hartbeespoort Dam	Site	1980	Year	1980	1980	1980	1980	One-time	64103	NA	NA	28429	50916.4	64103	28429	50916.4	ZAR	1995	Effective
391	SC679	GS	VanWyk2002	The cost of water hyacinth control in South Africa: a case study of three options	Van Wyk,E., Van Wilgen, B.W.	The aquatic plant water hyacinth (Eichhornia crassipes) was first recorded in South Africa during the early part of the 20th century. The plant has since spread across the country and is found in water bodies in both sub-tropical and temperate areas. The biology, ecology and impacts of water hyacinth are well studied, but sound and cost-effective management of it remains an enormous challenge in …	2002	English	Peer-reviewed article	NA	Yes	Plantae	Tracheophyta	Liliopsida	Pontederiales	Pontederiaceae	Eichhornia	Eichhornia crassipes	NA	water hyacinth	Aquatic	aquatic	N	NA	11	N	Africa	South Africa	NA	Hartbeespoort Dam	Site	1994	Year	1994	1994	1994	1994	One-time	70071	NA	NA	31075.7	55656.7	70071	31075.7	55656.7	ZAR	1995	Effective
392	SC683	NA	Hosking2002	Evaluating the environmental use of water - Selected case studies in the eastern and southern cape	Hosking SG; du Preez M; Campbell E.E; Wooldrige T.H. & du Plessis L.L.	South Africa is a drought-prone, water-poor region (Burgers, Marais & Bekker 1995:101). It has a mean annual rainfall of only 502mm and a mean annual runoff of only 42mm (420m3/ha/a) and for these reasons it seems very probable that water shortages will limit economic development in South Africa during the Twenty-first century (Briers & Powell 1993:1). Consequently, it is imperative that its wate…	2002	English	Official report	NA	Yes	Plantae	Tracheophyta	Magnoliopsida	Diverse/Unspecified	Diverse/Unspecified	Diverse/Unspecified	Diverse/Unspecified	NA	Trees (Acacias, pines, hakeas and populus)	Terrestrial	terrestrial	N	Moist upland grassland	4	N	Africa	South Africa	NA	Kat River	Site	Approximately between 2004 and 2013	Year	2002	2011	2002	2011	Potentially ongoing	71760	NA	NA	9277.23	30829.8	71760	9277.23	30829.8	ZAR	2002	Publication year
393	SC684	GS	VanWyk2002	The cost of water hyacinth control in South Africa: a case study of three options	Van Wyk,E., Van Wilgen, B.W.	The aquatic plant water hyacinth (Eichhornia crassipes) was first recorded in South Africa during the early part of the 20th century. The plant has since spread across the country and is found in water bodies in both sub-tropical and temperate areas. The biology, ecology and impacts of water hyacinth are well studied, but sound and cost-effective management of it remains an enormous challenge in …	2002	English	Peer-reviewed article	NA	Yes	Plantae	Tracheophyta	Liliopsida	Pontederiales	Pontederiaceae	Eichhornia	Eichhornia crassipes	NA	water hyacinth	Aquatic	aquatic	N	NA	11	N	Africa	South Africa	NA	Hartbeespoort Dam	Site	1995	Year	1995	1995	1995	1995	One-time	72967	NA	NA	32360.1	57957	72967	32360.1	57957	ZAR	1995	Effective
394	SC699	GS	vanWilgen1996	Valuation of ecosystem services	van Wilgen BW, Cowling RM, Burgers CJ	NA	1996	English	Peer-reviewed article	1)DWAF Department of Water Affairs and For- estry. 1994. Western Cape systems analy- sis: a study overview. Cape Town (South Africa):DWAF, City of Cape Town, Ninham Shand and BKS. 2)Le Maitre, D. C., Van Wilgen, B. W., Chapman, R. A., & McKelly, D. H. (1996). Invasive plants and water resources in the Western Cape Province, South Africa: modelling the consequences of a lack of management.Â Journa…	Yes	Plantae	Diverse/Unspecified	Diverse/Unspecified	Diverse/Unspecified	Diverse/Unspecified	Diverse/Unspecified	Diverse/Unspecified	NA	Diverse/Unspecified	Aquatic/Terrestrial	diverse/Unspecified	N	NA	3	N	Africa	South Africa	NA	Western Cape Province	Unit(10,000ha)	Unspecified/Yearly	Year	NA	NA	1996	1996	Potentially ongoing	80000	NA	NA	125021	250473	80000	125021	250473	USD	1996	Publication year
395	SC713	NA	Currie2009	Cost-benefit analysis of alien vegetation clearing for water yield and tourism in a mountain catchment in the Western Cape of South Africa	Currie B Milton SJ Steenkamp JC	Economic analysis is used to assess the costs and benefits of restoration following clearing of invasive alien trees in the floristically rich Fynbos mountainous area near Franschhoek, Western Cape of South Africa. The Groot Drakenstein, Franschhoek and Jonkershoek mountains receives more rainfall than the surrounding areas and is an important source of water for the city of Cape Town. The costs …	2009	English	Peer-reviewed article	NA	Yes	Plantae	Tracheophyta	Magnoliopsida	Diverse/Unspecified	Diverse/Unspecified	Diverse/Unspecified	Diverse/Unspecified	NA	Trees (Acacias and pines)	Terrestrial	terrestrial	N	Fynbos	3	N	Africa	South Africa	NA	Assegaaibos Mountain Catchment	Site	1996-2004	Period	1996	2004	1996	2004	One-time	86016	NA	NA	104589	196489	9557.33	11621	21832.1	USD	2006	Effective
396	SC718	NA	vanWilgen2017	An assessment of the evolution, costs and effectiveness of alien plant control operations in Kruger National Park, South Africa	van Wilgen, B.W., Fill, J.M., Govender, N., Foxcroft, L.C.	Alien plants were first recorded in 1937 in the 2 million ha Kruger National Park (KNP, a savanna protected area in South Africa), and attempts to control them began in the mid-1950s. The invasive alien plant control program expanded substantially in the late 1990s, but its overall efficacy has not been determined. We present an assessment of invasive alien plant control operations over several d…	2017	English	Peer-reviewed article	NA	Yes	Plantae	Tracheophyta	Magnoliopsida	Fabales	Fabaceae	Leucaena	Leucaena leucocephala	NA	River tamarid	Terrestrial	terrestrial	N	NA	4	Y	Africa	South Africa	NA	Kruger National Park	Site	1997-2016	Period	1997	2016	1997	2016	Potentially ongoing	90000	NA	NA	6248.78	15629.6	4500	312.439	781.48	ZAR	2016	Effective
397	SC775	NA	Hosking2002	Evaluating the environmental use of water - Selected case studies in the eastern and southern cape	Hosking SG; du Preez M; Campbell E.E; Wooldrige T.H. & du Plessis L.L.	South Africa is a drought-prone, water-poor region (Burgers, Marais & Bekker 1995:101). It has a mean annual rainfall of only 502mm and a mean annual runoff of only 42mm (420m3/ha/a) and for these reasons it seems very probable that water shortages will limit economic development in South Africa during the Twenty-first century (Briers & Powell 1993:1). Consequently, it is imperative that its wate…	2002	English	Official report	NA	Yes	Plantae	Tracheophyta	Magnoliopsida	Diverse/Unspecified	Diverse/Unspecified	Diverse/Unspecified	Diverse/Unspecified	NA	Trees (Acacias, pines, hakeas and populus)	Terrestrial	terrestrial	N	Moist upland grassland	4	N	Africa	South Africa	NA	Kat River	Site	Approximately between 2004 and 2013	Year	2002	2011	2002	2011	Potentially ongoing	131560	NA	NA	17008.3	56521.2	131560	17008.3	56521.2	ZAR	2002	Publication year
398	SC793	GS	VanWyk2002	The cost of water hyacinth control in South Africa: a case study of three options	Van Wyk,E., Van Wilgen, B.W.	The aquatic plant water hyacinth (Eichhornia crassipes) was first recorded in South Africa during the early part of the 20th century. The plant has since spread across the country and is found in water bodies in both sub-tropical and temperate areas. The biology, ecology and impacts of water hyacinth are well studied, but sound and cost-effective management of it remains an enormous challenge in …	2002	English	Peer-reviewed article	NA	Yes	Plantae	Tracheophyta	Liliopsida	Pontederiales	Pontederiaceae	Eichhornia	Eichhornia crassipes	NA	water hyacinth	Aquatic	aquatic	N	NA	11	N	Africa	South Africa	NA	Hartbeespoort Dam	Site	1979	Year	1979	1979	1979	1979	One-time	148148	NA	NA	65702	117672	148148	65702	117672	ZAR	1995	Effective
399	SC811	NA	vanWilgen1997	The sustainable development of water resources: History, financial costs, and benefits of alien plant control programmes	van Wilgen, B. W. Little, P. R., Chapman, R.A., Gorgens, A.H.M., Willems, T. and Marais, C.	The water resources of the Western Cape province, and the catchment areas that produce them, need to be carefully managed if future demands for water are to be met. Good catchment management, in the form of programmes to control alien invasive plants. provides an additional means for preventing losses of water, but needs to be justified financially. Previous programmes aimed at the control of ali…	1997	English	Peer-reviewed article	NA	Yes	Plantae	Tracheophyta	Magnoliopsida/Pinopsida	Pinales/Proteales	Pinaceae/Proteaceae	Pinus/Hakea	Pinus sp./Hakea sp.	NA	NA	Terrestrial	terrestrial	N	NA	NA	N	Africa	South Africa	NA	Skuifraam	Unit (5041 ha)	1996	Year	1996	2006	1996	2006	Potentially ongoing	180000	NA	NA	59651.5	120658	180000	59651.5	120658	ZAR	1997	Publication year
400	SC825	NA	vanWilgen1997	The sustainable development of water resources: History, financial costs, and benefits of alien plant control programmes	van Wilgen, B. W. Little, P. R., Chapman, R.A., Gorgens, A.H.M., Willems, T. and Marais, C.	The water resources of the Western Cape province, and the catchment areas that produce them, need to be carefully managed if future demands for water are to be met. Good catchment management, in the form of programmes to control alien invasive plants. provides an additional means for preventing losses of water, but needs to be justified financially. Previous programmes aimed at the control of ali…	1997	English	Peer-reviewed article	NA	Yes	Plantae	Tracheophyta	Magnoliopsida/Pinopsida	Pinales/Proteales	Pinaceae/Proteaceae	Pinus/Hakea	Pinus sp./Hakea sp.	NA	NA	Terrestrial	terrestrial	N	NA	NA	N	Africa	South Africa	NA	Theewaterskloof Catchment	Unit (32943 ha)	2007	Year	2007	2040	2007	2040	Potentially ongoing	190000	NA	NA	62965.5	127362	190000	62965.5	127362	ZAR	1997	Publication year
401	SC839	NA	Higgins1997b	An ecological economic simulation model of mountain fynbos ecosystems - Dynamics, valuation and management valuation	Higgins SI Turpie JK Costanza R Cowling RM LeMaitre DC Marais C Midgley GF	Mountain fynbos ecosystems in South Africa are threatened by alien plant invasions and by a lack of funding for effective management of these invasions. This paper develops an ecological-economic argument for the effective management of plant invasions in mountain fynbos ecosystems. We do this by building a dynamic ecological economic model which values the ecosystem services that fynbos ecosyste…	1997	English	Peer-reviewed article	Burges1995	Yes	Plantae	Diverse/Unspecified	Diverse/Unspecified	Diverse/Unspecified	Diverse/Unspecified	Diverse/Unspecified	Diverse/Unspecified	NA	Diverse/Unspecified	Terrestrial	terrestrial	N	Fynbos	3	N	Africa	South Africa	NA	Mountain Fynbos	Site	Approximatelly 1997	Year	1997	1997	1997	1997	Potentially ongoing	204500	NA	NA	67770.8	137081	204500	67770.8	137081	ZAR	1997	Publication year
402	SC847	NA	Currie2009	Cost-benefit analysis of alien vegetation clearing for water yield and tourism in a mountain catchment in the Western Cape of South Africa	Currie B Milton SJ Steenkamp JC	Economic analysis is used to assess the costs and benefits of restoration following clearing of invasive alien trees in the floristically rich Fynbos mountainous area near Franschhoek, Western Cape of South Africa. The Groot Drakenstein, Franschhoek and Jonkershoek mountains receives more rainfall than the surrounding areas and is an important source of water for the city of Cape Town. The costs …	2009	English	Peer-reviewed article	NA	Yes	Plantae	Tracheophyta	Magnoliopsida	Diverse/Unspecified	Diverse/Unspecified	Diverse/Unspecified	Diverse/Unspecified	NA	Trees (Acacias and pines)	Terrestrial	terrestrial	N	Fynbos	3	N	Africa	South Africa	NA	Assegaaibos Mountain Catchment	Site	1996-2002	Period	1996	2002	1996	2002	One-time	215257	NA	NA	261736	491719	30751	37390.8	70245.6	USD	2006	Effective
403	SC878	NA	vanWilgen2017	An assessment of the evolution, costs and effectiveness of alien plant control operations in Kruger National Park, South Africa	van Wilgen, B.W., Fill, J.M., Govender, N., Foxcroft, L.C.	Alien plants were first recorded in 1937 in the 2 million ha Kruger National Park (KNP, a savanna protected area in South Africa), and attempts to control them began in the mid-1950s. The invasive alien plant control program expanded substantially in the late 1990s, but its overall efficacy has not been determined. We present an assessment of invasive alien plant control operations over several d…	2017	English	Peer-reviewed article	NA	Yes	Plantae	Tracheophyta	Magnoliopsida	Lamiales	Bignoniaceae	Dolichandra	Dolichandra unguis-cati	NA	Cats claw creeper	Terrestrial	terrestrial	N	NA	4	Y	Africa	South Africa	NA	Kruger National Park	Site	1997-2016	Period	1997	2016	1997	2016	Potentially ongoing	280000	NA	NA	19440.6	48625.4	14000	972.032	2431.27	ZAR	2016	Effective
404	SC882	TC	EMTC_18	South African experience regarding alien species: impacts and control	Huntley et al	NA	1996	English	Book chapter	NA	Yes	Animalia	Chordata	Mammalia	Carnivora	Felidae	Felis	Felis domesticus	NA	NA	Terrestrial	terrestrial	N	NA	NA	N	Africa	South Africa	NA	Marion Island	Country	1992-1993	Year	1992	1993	1992	1993	One-time	290714	NA	NA	105671	211706	290714	105671	211706	ZAR	1996	Effective
405	SC889	NA	Hosking2002	Evaluating the environmental use of water - Selected case studies in the eastern and southern cape	Hosking SG; du Preez M; Campbell E.E; Wooldrige T.H. & du Plessis L.L.	South Africa is a drought-prone, water-poor region (Burgers, Marais & Bekker 1995:101). It has a mean annual rainfall of only 502mm and a mean annual runoff of only 42mm (420m3/ha/a) and for these reasons it seems very probable that water shortages will limit economic development in South Africa during the Twenty-first century (Briers & Powell 1993:1). Consequently, it is imperative that its wate…	2002	English	Official report	NA	Yes	Plantae	Tracheophyta	Magnoliopsida	Diverse/Unspecified	Diverse/Unspecified	Diverse/Unspecified	Diverse/Unspecified	NA	Trees (Acacias, pines, hakeas and populus)	Terrestrial	terrestrial	N	Moist upland grassland	4	N	Africa	South Africa	NA	Kat River	Site	Approximately between 2004 and 2013	Year	2002	2011	2002	2011	Potentially ongoing	304980	NA	NA	39428.2	131026	304980	39428.2	131026	ZAR	2002	Publication year
406	SC898	GS	VanWyk2002	The cost of water hyacinth control in South Africa: a case study of three options	Van Wyk,E., Van Wilgen, B.W.	The aquatic plant water hyacinth (Eichhornia crassipes) was first recorded in South Africa during the early part of the 20th century. The plant has since spread across the country and is found in water bodies in both sub-tropical and temperate areas. The biology, ecology and impacts of water hyacinth are well studied, but sound and cost-effective management of it remains an enormous challenge in …	2002	English	Peer-reviewed article	NA	Yes	Plantae	Tracheophyta	Liliopsida	Pontederiales	Pontederiaceae	Eichhornia	Eichhornia crassipes	NA	water hyacinth	Aquatic	aquatic	N	NA	11	N	Africa	South Africa	NA	Hartbeespoort Dam	Site	1978	Year	1978	1978	1978	1978	One-time	325203	NA	NA	144224	258306	325203	144224	258306	ZAR	1995	Effective
407	SC901	TC	NA	Quantification of the cross-sectoral impacts of waterweeds and their control in Ghana	Akpabey	The Akosombo Dam on the Volta River in Ghana was built in 1963 to provide cheap energy to fuel industry and to accelerate the economic growth of the country. It provides hydroelectric power, enhanced fishing and water transportation upstream, and improved opportunities for irrigated farming, especially in the lower reaches, and their attendant economic multiplier effects. A few years after the co…	2012	English	PhD thesis	NA	Yes	Plantae	Tracheophyta	Liliopsida	Pontederiales	Pontederiaceae	Eichhornia	Eichhornia crassipes	NA	Water hyacinth	Aquatic	aquatic	N	Oti River Arm of Lake Volta, Ghana	11	N	Africa	Ghana	NA	Oti River	Site	NA	Year	NA	NA	2012	2012	One-time	327036	NA	NA	349151	793108	327036	349151	793108	USD	2012	Publication year
408	SC911	NA	Hosking2002	Evaluating the environmental use of water - Selected case studies in the eastern and southern cape	Hosking SG; du Preez M; Campbell E.E; Wooldrige T.H. & du Plessis L.L.	South Africa is a drought-prone, water-poor region (Burgers, Marais & Bekker 1995:101). It has a mean annual rainfall of only 502mm and a mean annual runoff of only 42mm (420m3/ha/a) and for these reasons it seems very probable that water shortages will limit economic development in South Africa during the Twenty-first century (Briers & Powell 1993:1). Consequently, it is imperative that its wate…	2002	English	Official report	NA	Yes	Plantae	Tracheophyta	Magnoliopsida	Diverse/Unspecified	Diverse/Unspecified	Diverse/Unspecified	Diverse/Unspecified	NA	Trees (Acacias, pines, hakeas and populus)	Terrestrial	terrestrial	N	South-Eastern mountain grassland	4	N	Africa	South Africa	NA	Pott River	Site	Approximately between 2004 and 2013	Year	2002	2011	2002	2011	Potentially ongoing	343000	NA	NA	44343.5	147361	343000	44343.5	147361	ZAR	2002	Publication year
409	SC932	NA	Fraser2016	Economic evaluation of water loss saving due to the biological control of water hyacinth at New Yearâ€™s Dam, Eastern Cape province, South Africa	Fraser, G.C.G., Hill, M.P., Martin, J.A.	Water hyacinth Eichhornia crassipes is considered the most damaging aquatic weed in the world. However, few studies have quantified the impact of this weed economically and ecologically, and even fewer studies have quantified the benefits of its control. This paper focuses on water loss saving as the benefit derived from biological control of this plant between 1990 and 2013 at New Yearâ€™s Dam, …	2016	English	Peer-reviewed article	NA	Yes	Plantae	Tracheophyta	Liliopsida	Commelinales	Pontederiaceae	Eichhornia	Eichhornia crassipes	NA	Water hyacinth	Aquatic	aquatic	N	NA	11	N	Africa	South Africa	NA	New Year's Dam, Ec	Site	1990-2012	Period	1990	2012	1990	2012	One-time	402385	NA	NA	54255.8	105646	17495	2358.95	4593.31	ZAR	2009	Effective
410	SC953	NA	vanWilgen2017	An assessment of the evolution, costs and effectiveness of alien plant control operations in Kruger National Park, South Africa	van Wilgen, B.W., Fill, J.M., Govender, N., Foxcroft, L.C.	Alien plants were first recorded in 1937 in the 2 million ha Kruger National Park (KNP, a savanna protected area in South Africa), and attempts to control them began in the mid-1950s. The invasive alien plant control program expanded substantially in the late 1990s, but its overall efficacy has not been determined. We present an assessment of invasive alien plant control operations over several d…	2017	English	Peer-reviewed article	NA	Yes	Plantae	Tracheophyta	Magnoliopsida	Caryophyllales	Cactaceae	Cereus	Cereus jamacaru	NA	Queen of the night	Terrestrial	terrestrial	N	NA	4	Y	Africa	South Africa	NA	Kruger National Park	Site	1997-2016	Period	1997	2016	1997	2016	Potentially ongoing	480000	NA	NA	33326.8	83357.9	24000	1666.34	4167.89	ZAR	2016	Effective
412	SC976	NA	Hosking2002	Evaluating the environmental use of water - Selected case studies in the eastern and southern cape	Hosking SG; du Preez M; Campbell E.E; Wooldrige T.H. & du Plessis L.L.	South Africa is a drought-prone, water-poor region (Burgers, Marais & Bekker 1995:101). It has a mean annual rainfall of only 502mm and a mean annual runoff of only 42mm (420m3/ha/a) and for these reasons it seems very probable that water shortages will limit economic development in South Africa during the Twenty-first century (Briers & Powell 1993:1). Consequently, it is imperative that its wate…	2002	English	Official report	NA	Yes	Plantae	Tracheophyta	Magnoliopsida	Diverse/Unspecified	Diverse/Unspecified	Diverse/Unspecified	Diverse/Unspecified	NA	Trees (Acacias, pines, hakeas and populus)	Terrestrial	terrestrial	N	Moist upland grassland	4	N	Africa	South Africa	NA	Kat River	Site	Approximately between 2004 and 2013	Year	2002	2011	2002	2011	Potentially ongoing	538200	NA	NA	69579.2	231223	538200	69579.2	231223	ZAR	2002	Publication year
413	SC978	NA	Hosking2002	Evaluating the environmental use of water - Selected case studies in the eastern and southern cape	Hosking SG; du Preez M; Campbell E.E; Wooldrige T.H. & du Plessis L.L.	South Africa is a drought-prone, water-poor region (Burgers, Marais & Bekker 1995:101). It has a mean annual rainfall of only 502mm and a mean annual runoff of only 42mm (420m3/ha/a) and for these reasons it seems very probable that water shortages will limit economic development in South Africa during the Twenty-first century (Briers & Powell 1993:1). Consequently, it is imperative that its wate…	2002	English	Official report	NA	Yes	Plantae	Tracheophyta	Magnoliopsida	Diverse/Unspecified	Diverse/Unspecified	Diverse/Unspecified	Diverse/Unspecified	NA	Trees (Acacias, pines, hakeas and populus)	Terrestrial	terrestrial	N	South-Eastern mountain grassland	4	N	Africa	South Africa	NA	Pott River	Site	Approximately between 2004 and 2013	Year	2002	2011	2002	2011	Potentially ongoing	539000	NA	NA	69682.6	231567	539000	69682.6	231567	ZAR	2002	Publication year
414	SC987	NA	Hosking2002	Evaluating the environmental use of water - Selected case studies in the eastern and southern cape	Hosking SG; du Preez M; Campbell E.E; Wooldrige T.H. & du Plessis L.L.	South Africa is a drought-prone, water-poor region (Burgers, Marais & Bekker 1995:101). It has a mean annual rainfall of only 502mm and a mean annual runoff of only 42mm (420m3/ha/a) and for these reasons it seems very probable that water shortages will limit economic development in South Africa during the Twenty-first century (Briers & Powell 1993:1). Consequently, it is imperative that its wate…	2002	English	Official report	NA	Yes	Plantae	Tracheophyta	Magnoliopsida	Diverse/Unspecified	Diverse/Unspecified	Diverse/Unspecified	Diverse/Unspecified	NA	Trees (Acacias, pines, hakeas and populus)	Terrestrial	terrestrial	N	Grassy fynbos	3	N	Africa	South Africa	NA	Albany	Site	Approximately between 2004 and 2013	Year	2002	2011	2002	2011	Potentially ongoing	570000	NA	NA	73690.4	244885	570000	73690.4	244885	ZAR	2002	Publication year
415	SC1000	NA	Hosking2002	Evaluating the environmental use of water - Selected case studies in the eastern and southern cape	Hosking SG; du Preez M; Campbell E.E; Wooldrige T.H. & du Plessis L.L.	South Africa is a drought-prone, water-poor region (Burgers, Marais & Bekker 1995:101). It has a mean annual rainfall of only 502mm and a mean annual runoff of only 42mm (420m3/ha/a) and for these reasons it seems very probable that water shortages will limit economic development in South Africa during the Twenty-first century (Briers & Powell 1993:1). Consequently, it is imperative that its wate…	2002	English	Official report	NA	Yes	Plantae	Tracheophyta	Magnoliopsida	Diverse/Unspecified	Diverse/Unspecified	Diverse/Unspecified	Diverse/Unspecified	NA	Trees (Acacias, pines, hakeas and populus)	Terrestrial	terrestrial	N	Grassy fynbos, valley bushveld	3	N	Africa	South Africa	NA	Port Elizabeth Driftsands	Site	Approximately between 2004 and 2013	Year	2002	2011	2002	2011	Potentially ongoing	609000	NA	NA	78732.3	261641	609000	78732.3	261641	ZAR	2002	Publication year
416	SC1017	NA	Hosking2002	Evaluating the environmental use of water - Selected case studies in the eastern and southern cape	Hosking SG; du Preez M; Campbell E.E; Wooldrige T.H. & du Plessis L.L.	South Africa is a drought-prone, water-poor region (Burgers, Marais & Bekker 1995:101). It has a mean annual rainfall of only 502mm and a mean annual runoff of only 42mm (420m3/ha/a) and for these reasons it seems very probable that water shortages will limit economic development in South Africa during the Twenty-first century (Briers & Powell 1993:1). Consequently, it is imperative that its wate…	2002	English	Official report	NA	Yes	Plantae	Tracheophyta	Magnoliopsida	Diverse/Unspecified	Diverse/Unspecified	Diverse/Unspecified	Diverse/Unspecified	NA	Trees (Acacias, pines, hakeas and populus)	Terrestrial	terrestrial	N	Grassy fynbos	3	N	Africa	South Africa	NA	Albany	Site	Approximately between 2004 and 2013	Year	2002	2011	2002	2011	Potentially ongoing	684000	NA	NA	88428.4	293862	684000	88428.4	293862	ZAR	2002	Publication year
417	SC1022	TC	EMTC_15	Costs and benefits of biological control of invasive alien plants: case studies from South Africa	Van Wilgen et al	NA	2004	English	Peer-reviewed article	NA	Yes	Plantae	Tracheophyta	Magnoliopsida	Fabales	Fabaceae	Acacia	Acacia pycnantha	NA	Golden wattle	Terrestrial	terrestrial	N	NA	NA	N	Africa	South Africa	NA	South Africa	Country	1985-2001	Period	1985	2001	1985	2001	One-time	700000	NA	NA	143580	365493	41176.5	8445.89	21499.6	ZAR	2000	Effective
418	SC1024	NA	Hosking2002	Evaluating the environmental use of water - Selected case studies in the eastern and southern cape	Hosking SG; du Preez M; Campbell E.E; Wooldrige T.H. & du Plessis L.L.	South Africa is a drought-prone, water-poor region (Burgers, Marais & Bekker 1995:101). It has a mean annual rainfall of only 502mm and a mean annual runoff of only 42mm (420m3/ha/a) and for these reasons it seems very probable that water shortages will limit economic development in South Africa during the Twenty-first century (Briers & Powell 1993:1). Consequently, it is imperative that its wate…	2002	English	Official report	NA	Yes	Plantae	Tracheophyta	Magnoliopsida	Diverse/Unspecified	Diverse/Unspecified	Diverse/Unspecified	Diverse/Unspecified	NA	Trees (Acacias, pines, hakeas and populus)	Terrestrial	terrestrial	N	South-Eastern mountain grassland	4	N	Africa	South Africa	NA	Pott River	Site	Approximately between 2004 and 2013	Year	2002	2011	2002	2011	Potentially ongoing	703150	NA	NA	90904.2	302090	703150	90904.2	302090	ZAR	2002	Publication year
419	SC1046	NA	Hosking2002	Evaluating the environmental use of water - Selected case studies in the eastern and southern cape	Hosking SG; du Preez M; Campbell E.E; Wooldrige T.H. & du Plessis L.L.	South Africa is a drought-prone, water-poor region (Burgers, Marais & Bekker 1995:101). It has a mean annual rainfall of only 502mm and a mean annual runoff of only 42mm (420m3/ha/a) and for these reasons it seems very probable that water shortages will limit economic development in South Africa during the Twenty-first century (Briers & Powell 1993:1). Consequently, it is imperative that its wate…	2002	English	Official report	NA	Yes	Plantae	Tracheophyta	Magnoliopsida	Diverse/Unspecified	Diverse/Unspecified	Diverse/Unspecified	Diverse/Unspecified	NA	Trees (Acacias, pines, hakeas and populus)	Terrestrial	terrestrial	N	Grassy fynbos	3	N	Africa	South Africa	NA	Albany	Site	Approximately between 2004 and 2013	Year	2002	2011	2002	2011	Potentially ongoing	798000	NA	NA	103167	342839	798000	103167	342839	ZAR	2002	Publication year
420	SC1053	NA	vanWilgen2017	An assessment of the evolution, costs and effectiveness of alien plant control operations in Kruger National Park, South Africa	van Wilgen, B.W., Fill, J.M., Govender, N., Foxcroft, L.C.	Alien plants were first recorded in 1937 in the 2 million ha Kruger National Park (KNP, a savanna protected area in South Africa), and attempts to control them began in the mid-1950s. The invasive alien plant control program expanded substantially in the late 1990s, but its overall efficacy has not been determined. We present an assessment of invasive alien plant control operations over several d…	2017	English	Peer-reviewed article	NA	Yes	Plantae	Tracheophyta	Liliopsida	Asparagales	Agavaceae	Agave	Agave americana	NA	Sentry plant	Terrestrial	terrestrial	N	NA	4	Y	Africa	South Africa	NA	Kruger National Park	Site	1997-2016	Period	1997	2016	1997	2016	Potentially ongoing	820000	NA	NA	56933.3	142403	41000	2846.67	7120.15	ZAR	2016	Effective
421	SC1056	NA	7477	Evaluating the cost-effectiveness of invasive alien plant clearing: A case study from South Africa	McConnachie, M. M., Cowling, R. M. van Wilgen, B. W. McConnachie, D. A.	Conservation projects spend billions of dollars clearing invasive alien plants, yet few studies have measured the cost-effectiveness of doing this, especially over larger spatial and temporal scales, relevant to operational contexts. We evaluated the cost-effectiveness of South Africaâ€™s national invasive alien plant control programme, Working for Water, in reducing invasive alien plant cover in…	2012	English	Peer-reviewed article	NA	Yes	Plantae	Tracheophyta	Magnoliopsida	Fabales	Fabaceae	Acacia	Acacia mearnsii	NA	Black wattle	Terrestrial	terrestrial	N	NA	NA	N	Africa	South Africa	NA	Kouga River Catchment	Unit (2426 km2)	6 years (2002-2008)	Period	2002	2008	2002	2008	One-time	850000	NA	NA	130511	208860	121429	18644.4	29837.2	ZAR	2010	Effective
422	SC1068	NA	7477	Evaluating the cost-effectiveness of invasive alien plant clearing: A case study from South Africa	McConnachie, M. M., Cowling, R. M. van Wilgen, B. W. McConnachie, D. A.	Conservation projects spend billions of dollars clearing invasive alien plants, yet few studies have measured the cost-effectiveness of doing this, especially over larger spatial and temporal scales, relevant to operational contexts. We evaluated the cost-effectiveness of South Africaâ€™s national invasive alien plant control programme, Working for Water, in reducing invasive alien plant cover in…	2012	English	Peer-reviewed article	NA	Yes	Plantae	Tracheophyta	Magnoliopsida	Fabales	Fabaceae	Acacia	Acacia mearnsii	NA	Black wattle	Terrestrial	terrestrial	N	NA	NA	N	Africa	South Africa	NA	Krom River Catchment	Unit (1556 km2)	6 years (2002-2008)	Period	2002	2008	2002	2008	One-time	900000	NA	NA	138188	221146	128571	19741.1	31592.3	ZAR	2010	Effective
423	SC1089	NA	Wise2007	The Economic Impact and Appropriate Management of Selected Invasive Alien Species on the African Continent	Wise, R.M., van Wilgen, B.W., Hill, M.P., Schulthess, F., Tweddle, D., Chabi-Olay, A. and Zimmermann, H.G.	This report provides case studies of the economic impact of five invasive alien species in different areas in Africa. The overall aim of this work was to provide detailed information to administrators and managers. The species were: â€¢ Nile tilapia (Oreochromis niloticus); â€¢ Water hyacinth (Eichhornia crassipes); â€¢ The larger grain borer (Prostephanus truncatus); â€¢ Parthenium weed (Parthen…	2007	English	Official report	NA	Yes	Plantae	Tracheophyta	Liliopsida	Commelinales	Pontederiaceae	Eichhornia	Eichhornia crassipes	NA	Water hyacinth	Aquatic	aquatic	N	NA	NA	N	Africa	Uganda	NA	Owen Falls Dam	Site	2006	Period	2006	2006	2006	2006	One-time	1000000	NA	NA	1.21592e+06	4.34043e+06	1000000	1.21592e+06	4.34043e+06	USD	2006	Effective
424	SC1101	NA	Hosking2002	Evaluating the environmental use of water - Selected case studies in the eastern and southern cape	Hosking SG; du Preez M; Campbell E.E; Wooldrige T.H. & du Plessis L.L.	South Africa is a drought-prone, water-poor region (Burgers, Marais & Bekker 1995:101). It has a mean annual rainfall of only 502mm and a mean annual runoff of only 42mm (420m3/ha/a) and for these reasons it seems very probable that water shortages will limit economic development in South Africa during the Twenty-first century (Briers & Powell 1993:1). Consequently, it is imperative that its wate…	2002	English	Official report	NA	Yes	Plantae	Tracheophyta	Magnoliopsida	Diverse/Unspecified	Diverse/Unspecified	Diverse/Unspecified	Diverse/Unspecified	NA	Trees (Acacias, pines, hakeas and populus)	Terrestrial	terrestrial	N	Moist upland grassland	4	N	Africa	South Africa	NA	Kat River	Site	Approximately between 2004 and 2013	Year	2002	2011	2002	2011	Potentially ongoing	1004640	NA	NA	129881	431617	1004640	129881	431617	ZAR	2002	Publication year
425	SC1114	NA	vanWilgen2016	Historical costs and projected future scenarios for the management of invasive alien plants in protected areas in the Cape Floristic Region	van Wilgen, B.W., Fill, J.M., Baard, J., Cheney, C., Forsyth, A.T. and Kraaij, T.	Scarce funds for conservation need to be optimally used, yet there are few studies that record the costs and projected outcomes of major conservation efforts. Here we document the historical costs and extent of efforts to control invasive alien plants in the protected areas of the Cape Floristic Region of South Africa, a biodiversity hotspot of global importance. We also estimate the resources th…	2016	English	Peer-reviewed article	NA	Yes	Plantae	Tracheophyta	Magnoliopsida	Myrtales	Myrtaceae	Leptospermum	Leptospermum sp.	NA	Myrtles	Terrestrial	terrestrial	N	NA	NA	Y	Africa	South Africa	Wyoming	Western Cape Province	Unit (750 000 ha)	future	Period	2015	2035	2015	2035	One-time	1100000	NA	NA	89161.4	205135	52381	4245.78	9768.34	ZAR	2015	Effective
426	SC1115	NA	vanWilgen1997	The sustainable development of water resources: History, financial costs, and benefits of alien plant control programmes	van Wilgen, B. W. Little, P. R., Chapman, R.A., Gorgens, A.H.M., Willems, T. and Marais, C.	The water resources of the Western Cape province, and the catchment areas that produce them, need to be carefully managed if future demands for water are to be met. Good catchment management, in the form of programmes to control alien invasive plants. provides an additional means for preventing losses of water, but needs to be justified financially. Previous programmes aimed at the control of ali…	1997	English	Peer-reviewed article	NA	Yes	Plantae	Tracheophyta	Magnoliopsida/Pinopsida	Pinales/Proteales	Pinaceae/Proteaceae	Pinus/Hakea	Pinus sp./Hakea sp.	NA	NA	Terrestrial	terrestrial	N	NA	NA	N	Africa	South Africa	South Dakota	Theewaterskloof Catchment	Unit (32943 ha)	1996	Year	1996	2006	1996	2006	Potentially ongoing	1100000	NA	NA	364537	737356	1100000	364537	737356	ZAR	1997	Publication year
427	SC1121	NA	LeMaitre2002b	Invasive plants and water resources in the Western Cape Province, South Africa: modelling the consequences of a lack of management	Le Maitre, D.C., Van Wilgen, B.W., Chapman, R.A., McKelly, D.H.	1. The invasion of fynbos shrublands by woody weed species can reduce the water yield from catchment areas dramatically. We modelled the consequences of uncontrolled invasion on water yield using a geographical information system (Arc/Info). 2. Five important processes were recognized: the occurrence of fire; the spread and establishment of alien plants after fire; rainfall-to-run-off ratios; gro…	1996	English	Peer-reviewed article	VanWilgen2011b	Yes	Plantae	Tracheophyta	Diverse/Unspecified	Diverse/Unspecified	Diverse/Unspecified	Diverse/Unspecified	Diverse/Unspecified	NA	various	Terrestrial	terrestrial	N	mesic and dry mountain fynbos shrublands (Moll et al. 1984).	3	N	Africa	South Africa	Western Cape Province	Kogelberg State Forest	Unit(35000 ha)	1996	Year	1996	1996	1996	1996	Potentially ongoing	1155000	NA	NA	419829	841104	1155000	419829	841104	ZAR	1996	Publication year
428	SC1124	NA	7477	Evaluating the cost-effectiveness of invasive alien plant clearing: A case study from South Africa	McConnachie, M. M., Cowling, R. M. van Wilgen, B. W. McConnachie, D. A.	Conservation projects spend billions of dollars clearing invasive alien plants, yet few studies have measured the cost-effectiveness of doing this, especially over larger spatial and temporal scales, relevant to operational contexts. We evaluated the cost-effectiveness of South Africaâ€™s national invasive alien plant control programme, Working for Water, in reducing invasive alien plant cover in…	2012	English	Peer-reviewed article	NA	Yes	Plantae	Tracheophyta	Magnoliopsida	Fabales	Fabaceae	Acacia	Acacia mearnsii	NA	Black wattle	Terrestrial	terrestrial	N	NA	NA	N	Africa	South Africa	NA	Kouga River Catchment	Unit (2426 km2)	6 years (2002-2008)	Period	2002	2008	2002	2008	One-time	1180000	NA	NA	181180	289947	168571	25882.8	41421	ZAR	2010	Effective
429	SC1129	NA	7477	Evaluating the cost-effectiveness of invasive alien plant clearing: A case study from South Africa	McConnachie, M. M., Cowling, R. M. van Wilgen, B. W. McConnachie, D. A.	Conservation projects spend billions of dollars clearing invasive alien plants, yet few studies have measured the cost-effectiveness of doing this, especially over larger spatial and temporal scales, relevant to operational contexts. We evaluated the cost-effectiveness of South Africaâ€™s national invasive alien plant control programme, Working for Water, in reducing invasive alien plant cover in…	2012	English	Peer-reviewed article	NA	Yes	Plantae	Tracheophyta	Magnoliopsida	Fabales	Fabaceae	Acacia	Acacia mearnsii	NA	Black wattle	Terrestrial	terrestrial	N	NA	NA	N	Africa	South Africa	NA	Krom River Catchment	Unit (1556 km2)	6 years (2002-2008)	Period	2002	2008	2002	2008	One-time	1240000	NA	NA	190392	304690	177143	27198.9	43527.2	ZAR	2010	Effective
430	SC1134	NA	167	Alien invading plants and water resources in South Africa: A preliminary assessment	Versveld, D.B., Le Maitre, D.C. & Chapman, R. A.	Alien plant invasions are recognised as a major threat to the natural resources of South Africa, and particularly to the water resource. A national programme 'Working for Water1, under the auspices of the Department of Water Affairs and Forestry* is aimed at bnnging the problem of plant invasions under control. This umbrella programme operates at a level of approximately R150 million per year and…	1998	English	Official report	NA	Yes	Plantae	Diverse/Unspecified	Diverse/Unspecified	Diverse/Unspecified	Diverse/Unspecified	Diverse/Unspecified	Diverse/Unspecified	NA	Alien plants	Terrestrial	terrestrial	N	NA	NA	NA	Africa	Lesotho	NA	NA	Country	Approximatelly between 1998 and 2018	Period	1998	2018	1998	2018	Potentially ongoing	1290000	NA	NA	350887	925171	61428.6	16708.9	44055.8	ZAR	1998	Publication year
431	SC1139	NA	vanWilgen2017	An assessment of the evolution, costs and effectiveness of alien plant control operations in Kruger National Park, South Africa	van Wilgen, B.W., Fill, J.M., Govender, N., Foxcroft, L.C.	Alien plants were first recorded in 1937 in the 2 million ha Kruger National Park (KNP, a savanna protected area in South Africa), and attempts to control them began in the mid-1950s. The invasive alien plant control program expanded substantially in the late 1990s, but its overall efficacy has not been determined. We present an assessment of invasive alien plant control operations over several d…	2017	English	Peer-reviewed article	NA	Yes	Plantae	Tracheophyta	Liliopsida	Poales	Poaceae	Arundo	Arundo donax	NA	Robust reed	Terrestrial	terrestrial	N	NA	4	Y	Africa	South Africa	NA	Kruger National Park	Site	1997-2016	Period	1997	2016	1997	2016	Potentially ongoing	1300000	NA	NA	90260.1	225761	65000	4513.01	11288	ZAR	2016	Effective
432	SC1167	NA	vanWilgen2017	An assessment of the evolution, costs and effectiveness of alien plant control operations in Kruger National Park, South Africa	van Wilgen, B.W., Fill, J.M., Govender, N., Foxcroft, L.C.	Alien plants were first recorded in 1937 in the 2 million ha Kruger National Park (KNP, a savanna protected area in South Africa), and attempts to control them began in the mid-1950s. The invasive alien plant control program expanded substantially in the late 1990s, but its overall efficacy has not been determined. We present an assessment of invasive alien plant control operations over several d…	2017	English	Peer-reviewed article	NA	Yes	Plantae	Tracheophyta	Magnoliopsida	Caryophyllales	Cactaceae	Opuntia	Opuntia stricta	NA	Erect prickly pear	Terrestrial	terrestrial	N	NA	4	Y	Africa	South Africa	NA	Kruger National Park	Site	1997-2016	Period	1997	2016	1997	2016	Potentially ongoing	1500000	NA	NA	104146	260493	75000	5207.32	13024.7	ZAR	2016	Effective
433	SC1175	NA	Hosking2002	Evaluating the environmental use of water - Selected case studies in the eastern and southern cape	Hosking SG; du Preez M; Campbell E.E; Wooldrige T.H. & du Plessis L.L.	South Africa is a drought-prone, water-poor region (Burgers, Marais & Bekker 1995:101). It has a mean annual rainfall of only 502mm and a mean annual runoff of only 42mm (420m3/ha/a) and for these reasons it seems very probable that water shortages will limit economic development in South Africa during the Twenty-first century (Briers & Powell 1993:1). Consequently, it is imperative that its wate…	2002	English	Official report	NA	Yes	Plantae	Tracheophyta	Magnoliopsida	Diverse/Unspecified	Diverse/Unspecified	Diverse/Unspecified	Diverse/Unspecified	NA	Trees (Acacias, pines, hakeas and populus)	Terrestrial	terrestrial	N	Grassy fynbos	3	N	Africa	South Africa	NA	Albany	Site	Approximately between 2004 and 2013	Year	2002	2011	2002	2011	Potentially ongoing	1596000	NA	NA	206333	685679	1596000	206333	685679	ZAR	2002	Publication year
434	SC1179	NA	Hosking2002	Evaluating the environmental use of water - Selected case studies in the eastern and southern cape	Hosking SG; du Preez M; Campbell E.E; Wooldrige T.H. & du Plessis L.L.	South Africa is a drought-prone, water-poor region (Burgers, Marais & Bekker 1995:101). It has a mean annual rainfall of only 502mm and a mean annual runoff of only 42mm (420m3/ha/a) and for these reasons it seems very probable that water shortages will limit economic development in South Africa during the Twenty-first century (Briers & Powell 1993:1). Consequently, it is imperative that its wate…	2002	English	Official report	NA	Yes	Plantae	Tracheophyta	Magnoliopsida	Diverse/Unspecified	Diverse/Unspecified	Diverse/Unspecified	Diverse/Unspecified	NA	Trees (Acacias, pines, hakeas and populus)	Terrestrial	terrestrial	N	Moist upland grassland	4	N	Africa	South Africa	NA	Kat River	Site	Approximately between 2004 and 2013	Year	2002	2011	2002	2011	Potentially ongoing	1722240	NA	NA	222653	739914	1722240	222653	739914	ZAR	2002	Publication year
435	SC1182	NA	Hosking2002	Evaluating the environmental use of water - Selected case studies in the eastern and southern cape	Hosking SG; du Preez M; Campbell E.E; Wooldrige T.H. & du Plessis L.L.	South Africa is a drought-prone, water-poor region (Burgers, Marais & Bekker 1995:101). It has a mean annual rainfall of only 502mm and a mean annual runoff of only 42mm (420m3/ha/a) and for these reasons it seems very probable that water shortages will limit economic development in South Africa during the Twenty-first century (Briers & Powell 1993:1). Consequently, it is imperative that its wate…	2002	English	Official report	NA	Yes	Plantae	Tracheophyta	Magnoliopsida	Diverse/Unspecified	Diverse/Unspecified	Diverse/Unspecified	Diverse/Unspecified	NA	Trees (Acacias, pines, hakeas and populus)	Terrestrial	terrestrial	N	Grassy fynbos, valley bushveld	3	N	Africa	South Africa	NA	Port Elizabeth Driftsands	Site	Approximately between 2004 and 2013	Year	2002	2011	2002	2011	Potentially ongoing	1740000	NA	NA	224950	747544	1740000	224950	747544	ZAR	2002	Publication year
436	SC1201	NA	Hosking2002	Evaluating the environmental use of water - Selected case studies in the eastern and southern cape	Hosking SG; du Preez M; Campbell E.E; Wooldrige T.H. & du Plessis L.L.	South Africa is a drought-prone, water-poor region (Burgers, Marais & Bekker 1995:101). It has a mean annual rainfall of only 502mm and a mean annual runoff of only 42mm (420m3/ha/a) and for these reasons it seems very probable that water shortages will limit economic development in South Africa during the Twenty-first century (Briers & Powell 1993:1). Consequently, it is imperative that its wate…	2002	English	Official report	NA	Yes	Plantae	Tracheophyta	Magnoliopsida	Diverse/Unspecified	Diverse/Unspecified	Diverse/Unspecified	Diverse/Unspecified	NA	Trees (Acacias, pines, hakeas and populus)	Terrestrial	terrestrial	N	Grassy fynbos	3	N	Africa	South Africa	NA	Albany	Site	Approximately between 2004 and 2013	Year	2002	2011	2002	2011	Potentially ongoing	1938000	NA	NA	250547	832610	1938000	250547	832610	ZAR	2002	Publication year
437	SC1214	WoS	DeGrotte2003	Economic impact of biological control of water hyacinth in Southern Benin	De Groote et al.	A biological control program of water hyacinth was undertaken in Southern Benin between 1991 and 1993. It consisted of the release of three natural enemies, two weevil species and one moth, that feed exclusively on water hyacinth. In 1999, a survey of 365 men and women from 192 households in 24 villages in the target area, using participatory and quantitative methods, revealed that water hyacinth…	2003	English	Peer-reviewed article	NA	Yes	Plantae	Tracheophyta	Liliopsida	Pontederiales	Pontederiaceae	Eichhornia	Eichhornia crassipes	NA	Water hyacinth	Aquatic	aquatic	N	Wetlands	10	N	Africa	Benin	NA	Southern Benin	Site	20 years (since 1999)	Period	1999	2019	1999	2019	One-time	2090000	NA	NA	3.07549e+06	9.61562e+06	99523.8	146452	457887	USD	1999	Effective
438	SC1229	TC	EMTC_15	Costs and benefits of biological control of invasive alien plants: case studies from South Africa	Van Wilgen et al	NA	2004	English	Peer-reviewed article	NA	Yes	Plantae	Tracheophyta	Magnoliopsida	Fabales	Fabaceae	Acacia	Acacia longifolia	NA	Long-leaved wattle	Terrestrial	terrestrial	N	NA	NA	N	Africa	South Africa	NA	South Africa	Country	1981-1991	Period	1981	1991	1981	1991	One-time	2300000	NA	NA	471763	1.20091e+06	209091	42887.6	109173	ZAR	2000	Effective
439	SC1261	TC	EMTC_15	Costs and benefits of biological control of invasive alien plants: case studies from South Africa	Van Wilgen et al	NA	2004	English	Peer-reviewed article	NA	Yes	Plantae	Tracheophyta	Magnoliopsida	Fabales	Fabaceae	Sesbania	Sesbania punicea	NA	Red sesbania	Terrestrial	terrestrial	N	NA	NA	N	Africa	South Africa	NA	South Africa	Country	1978-1997	Period	1978	1997	1978	1997	One-time	3000000	NA	NA	615343	1.5664e+06	150000	30767.2	78320	ZAR	2000	Effective
440	SC1271	GS	VanWyk2002	The cost of water hyacinth control in South Africa: a case study of three options	Van Wyk,E., Van Wilgen, B.W.	The aquatic plant water hyacinth (Eichhornia crassipes) was first recorded in South Africa during the early part of the 20th century. The plant has since spread across the country and is found in water bodies in both sub-tropical and temperate areas. The biology, ecology and impacts of water hyacinth are well studied, but sound and cost-effective management of it remains an enormous challenge in …	2002	English	Peer-reviewed article	NA	Yes	Plantae	Tracheophyta	Liliopsida	Pontederiales	Pontederiaceae	Eichhornia	Eichhornia crassipes	NA	water hyacinth	Aquatic	aquatic	N	NA	11	N	Africa	South Africa	NA	Hartbeespoort Dam	Site	1977	Year	1977	1977	1977	1977	One-time	3129248	NA	NA	1.38779e+06	2.48553e+06	3129248	1.38779e+06	2.48553e+06	ZAR	1995	Effective
441	SC1277	NA	Hosking2002	Evaluating the environmental use of water - Selected case studies in the eastern and southern cape	Hosking SG; du Preez M; Campbell E.E; Wooldrige T.H. & du Plessis L.L.	South Africa is a drought-prone, water-poor region (Burgers, Marais & Bekker 1995:101). It has a mean annual rainfall of only 502mm and a mean annual runoff of only 42mm (420m3/ha/a) and for these reasons it seems very probable that water shortages will limit economic development in South Africa during the Twenty-first century (Briers & Powell 1993:1). Consequently, it is imperative that its wate…	2002	English	Official report	NA	Yes	Plantae	Tracheophyta	Magnoliopsida	Diverse/Unspecified	Diverse/Unspecified	Diverse/Unspecified	Diverse/Unspecified	NA	Trees (Acacias, pines, hakeas and populus)	Terrestrial	terrestrial	N	Mountain fynbos	3	Y	Africa	South Africa	NA	Tsitsikamma	Site	Approximately between 2004 and 2013	Year	2002	2011	2002	2011	Potentially ongoing	3219575	NA	NA	416231	1.3832e+06	3219575	416231	1.3832e+06	ZAR	2002	Publication year
442	SC1288	NA	7870	An assessment of the effectiveness of a large, national-scale invasive alien plant control strategy in South Africa	van Wilgen, B. W., Forsyth, G. G., Le Maitre, D. C. , Wannenburgh, A., Kotze, J. D. F., van den Berg, E., Henderson, L.	This paper presents an assessment of a large, national-scale alien plant control program that has operated in South Africa for 15 years. We reviewed data from three national-level estimates of the extent of invasion, records of the costs and spatial extent of invasive species control operations, assessments of the effectiveness of biological control, and smaller-scale studies. The 19 most importa…	2012	English	Peer-reviewed article	NA	Yes	Plantae	Tracheophyta	Magnoliopsida	Fabales	Fabaceae	Caesalpinia	Caesalpinia decapetala	NA	Thorny poinciana/Mysore thorn/Mubage/Mauritius thorn/Cat's claw	Terrestrial	terrestrial	N	Indian Ocean Coastal Belt biome	5	N	Africa	South Africa	NA	Indian Ocean Coastal Belt Biome	Site	1995-2008	Period	1995	2008	1995	2009	Potentially ongoing	3400000	NA	NA	468558	949013	226667	31237.2	63267.6	ZAR	2008	Effective
443	SC1292	NA	Hosking2002	Evaluating the environmental use of water - Selected case studies in the eastern and southern cape	Hosking SG; du Preez M; Campbell E.E; Wooldrige T.H. & du Plessis L.L.	South Africa is a drought-prone, water-poor region (Burgers, Marais & Bekker 1995:101). It has a mean annual rainfall of only 502mm and a mean annual runoff of only 42mm (420m3/ha/a) and for these reasons it seems very probable that water shortages will limit economic development in South Africa during the Twenty-first century (Briers & Powell 1993:1). Consequently, it is imperative that its wate…	2002	English	Official report	NA	Yes	Plantae	Tracheophyta	Magnoliopsida	Diverse/Unspecified	Diverse/Unspecified	Diverse/Unspecified	Diverse/Unspecified	NA	Trees (Acacias, pines, hakeas and populus)	Terrestrial	terrestrial	N	Grassy fynbos, valley bushveld	3	N	Africa	South Africa	NA	Port Elizabeth Driftsands	Site	Approximately between 2004 and 2013	Year	2002	2011	2002	2011	Potentially ongoing	3480000	NA	NA	449899	1.49509e+06	3480000	449899	1.49509e+06	ZAR	2002	Publication year
444	SC1300	NA	7477	Evaluating the cost-effectiveness of invasive alien plant clearing: A case study from South Africa	McConnachie, M. M., Cowling, R. M. van Wilgen, B. W. McConnachie, D. A.	Conservation projects spend billions of dollars clearing invasive alien plants, yet few studies have measured the cost-effectiveness of doing this, especially over larger spatial and temporal scales, relevant to operational contexts. We evaluated the cost-effectiveness of South Africaâ€™s national invasive alien plant control programme, Working for Water, in reducing invasive alien plant cover in…	2012	English	Peer-reviewed article	NA	Yes	Plantae	Tracheophyta	Magnoliopsida	Fabales	Fabaceae	Acacia	Acacia mearnsii	NA	Black wattle	Terrestrial	terrestrial	N	NA	NA	N	Africa	South Africa	NA	Krom River Catchment	Site	2009	Period	2009	2009	2009	2009	One-time	3590000	NA	NA	551216	882127	3590000	551216	882127	ZAR	2010	Effective
445	SC1304	GS	NA	Tomato leafminer (Tuta absoluta): Impacts and coping strategies for Africa	Rwomushana et al.	The recently introduced tomato leafminer, Tuta absoluta, has become the most important pest constraint to tomato production in Africa. Spreading at an average 800 km/year, it is now present in 41 African countries. The socio-economic impacts of Tuta absoluta were assessed through a household survey in Kenya and Zambia in 2018, covering 400 respondents in Kenya and 426 in Zambia. We found that 97.…	2019	English	Working paper	NA	Yes	Animalia	Arthropoda	Insecta	Lepidoptera	Gelechiidae	Tuta	Tuta absoluta	NA	Tomato leafminer or Tuta absoluta	Terrestrial	terrestrial	N	NA	12b	N	Africa	Ethiopia	NA	NA	Country	2018	Year	2018	2018	2018	2018	Potentially ongoing	3700000	NA	NA	3.61178e+06	9.93522e+06	3700000	3.61178e+06	9.93522e+06	USD	2018	Effective
446	SC1311	NA	vanWilgen2017	An assessment of the evolution, costs and effectiveness of alien plant control operations in Kruger National Park, South Africa	van Wilgen, B.W., Fill, J.M., Govender, N., Foxcroft, L.C.	Alien plants were first recorded in 1937 in the 2 million ha Kruger National Park (KNP, a savanna protected area in South Africa), and attempts to control them began in the mid-1950s. The invasive alien plant control program expanded substantially in the late 1990s, but its overall efficacy has not been determined. We present an assessment of invasive alien plant control operations over several d…	2017	English	Peer-reviewed article	NA	Yes	Plantae	Tracheophyta	Magnoliopsida	Solanales	Solanaceae	Solanum	Solanum mauritianum	NA	Bugweed	Terrestrial	terrestrial	N	NA	4	Y	Africa	South Africa	NA	Kruger National Park	Site	1997-2016	Period	1997	2016	1997	2016	Potentially ongoing	3900000	NA	NA	270780	677283	195000	13539	33864.1	ZAR	2016	Effective
448	SC1314	NA	Higgins2000	Using a dynamic landscape model for planning the management of alien plant invasions	Higgins, SI, Richardson, DM, Cowling, RM	Biological invasions are widespread phenomena that threaten the integrity and functioning of natural ecosystems. In this paper we develop a model that is designed to be a decision-making tool for planning and managing alien plant control operations. Most decision tools adopt a static approach; in this application we integrate a dynamic simulation model of alien plant spread with decision-making t…	2000	English	Peer-reviewed article	NA	Yes	Plantae	Tracheophyta	Diverse/Unspecified	Diverse/Unspecified	Diverse/Unspecified	Diverse/Unspecified	Diverse/Unspecified	NA	Acacia cyclops & Pinus pinaster	Terrestrial	terrestrial	N	fynbos (mediterranean-type shrubland)	3	N	Africa	South Africa	NA	Cape Peninsula	Site	12 to 50 years, depending on strategy	Period	2000	2050	2000	2050	One-time	4000000	4000000	10000000	6.10826e+06	1.23553e+07	78431.4	119770	242261	USD	1997	Publication year
449	SC1319	NA	vanWilgen2017	An assessment of the evolution, costs and effectiveness of alien plant control operations in Kruger National Park, South Africa	van Wilgen, B.W., Fill, J.M., Govender, N., Foxcroft, L.C.	Alien plants were first recorded in 1937 in the 2 million ha Kruger National Park (KNP, a savanna protected area in South Africa), and attempts to control them began in the mid-1950s. The invasive alien plant control program expanded substantially in the late 1990s, but its overall efficacy has not been determined. We present an assessment of invasive alien plant control operations over several d…	2017	English	Peer-reviewed article	NA	Yes	Plantae	Tracheophyta	Magnoliopsida	Fabales	Fabaceae	Sesbania	Sesbania sp.	NA	Riverhemp	Terrestrial	terrestrial	N	NA	4	Y	Africa	South Africa	NA	Kruger National Park	Site	1997-2016	Period	1997	2016	1997	2016	Potentially ongoing	4000000	NA	NA	277723	694649	200000	13886.2	34732.4	ZAR	2016	Effective
450	SC1325	NA	LeMaitre2002	Invasive alien trees and water resources in South Africa: case studies of the costs and benefits of management	Le Maitre, D. C., van Wilgen, B.W., Gelderblom, C. M., Bailey, C., Chapman, R.A. and Nel, J.A.	Invasive alien plants are consumptive water-users, and may have reduced river flows in South Africa by about 6.7% according to a broad-scale study. An effective programme to bring the invasions under control would cost about US$ 92 million per year for the next 20 years. This paper reports on studies of four representative catchments (the Sonderend, Keurbooms, Upper Wilge and Sabie-Sand) to asses…	2002	English	Peer-reviewed article	NA	Yes	Plantae	Diverse/Unspecified	Diverse/Unspecified	Diverse/Unspecified	Diverse/Unspecified	Diverse/Unspecified	Diverse/Unspecified	NA	NA	Terrestrial	terrestrial	N	NA	NA	N	Africa	South Africa	NA	Upper Wilge	Unit (6160 km2)	2000	Period	2000	2000	2000	2000	One-time	4100000	NA	NA	5.58716e+06	1.85671e+07	4100000	5.58716e+06	1.85671e+07	USD	2002	Publication year
451	SC1327	NA	Hosking2002	Evaluating the environmental use of water - Selected case studies in the eastern and southern cape	Hosking SG; du Preez M; Campbell E.E; Wooldrige T.H. & du Plessis L.L.	South Africa is a drought-prone, water-poor region (Burgers, Marais & Bekker 1995:101). It has a mean annual rainfall of only 502mm and a mean annual runoff of only 42mm (420m3/ha/a) and for these reasons it seems very probable that water shortages will limit economic development in South Africa during the Twenty-first century (Briers & Powell 1993:1). Consequently, it is imperative that its wate…	2002	English	Official report	NA	Yes	Plantae	Tracheophyta	Magnoliopsida	Diverse/Unspecified	Diverse/Unspecified	Diverse/Unspecified	Diverse/Unspecified	NA	Trees (Acacias, pines, hakeas and populus)	Terrestrial	terrestrial	N	Grassy fynbos	3	N	Africa	South Africa	NA	Albany	Site	Approximately between 2004 and 2013	Year	2002	2011	2002	2011	Potentially ongoing	4104000	NA	NA	530571	1.76317e+06	4104000	530571	1.76317e+06	ZAR	2002	Publication year
452	SC1329	WoS	Bekele2018	Economic impacts ofÂ Prosopis spp. invasions on dryland ecosystem services in Ethiopia and Kenya: Evidence from choice experimental data	Bekele et al.	Biological invasions can induce trajectories of changes that make ecosystems fragile and less reliable in providing services and goods. Here we set out to assess the economic value of dry land ecosystem services affected by the invasive tree Prosopis, which was originally introduced in Africa and elsewhere for providing firewood, animal fodder and other services to rural people. Based on choice e…	2018	English	Peer-reviewed article	NA	Yes	Plantae	Tracheophyta	Magnoliopsida	Fabales	Fabaceae	Prosopis	Prosopis juliflora	NA	Prosopis	Terrestrial	terrestrial	N	Main vegetation types in the study area comprise bush land, shrub land, riverine forests, grasslands and seasonal marshes and swamps	3\4\9\10	N	Africa	Kenya	NA	Baringo County	Site	NA	Year	NA	NA	2018	2018	Potentially ongoing	4200000	NA	NA	4.09986e+06	8.3115e+06	4200000	4.09986e+06	8.3115e+06	USD	2018	Publication year
453	SC1332	NA	7870	An assessment of the effectiveness of a large, national-scale invasive alien plant control strategy in South Africa	van Wilgen, B. W., Forsyth, G. G., Le Maitre, D. C. , Wannenburgh, A., Kotze, J. D. F., van den Berg, E., Henderson, L.	This paper presents an assessment of a large, national-scale alien plant control program that has operated in South Africa for 15 years. We reviewed data from three national-level estimates of the extent of invasion, records of the costs and spatial extent of invasive species control operations, assessments of the effectiveness of biological control, and smaller-scale studies. The 19 most importa…	2012	English	Peer-reviewed article	NA	Yes	Plantae	Tracheophyta	Magnoliopsida	Fabales	Fabaceae	Acacia	Acacia mearnsii	NA	Black wattle	Terrestrial	terrestrial	N	Forest biome	1	N	Africa	South Africa	NA	Forest Biome	Site	1995-2008	Period	1995	2008	1995	2009	Potentially ongoing	4300000	NA	NA	592588	1.20022e+06	286667	39505.9	80014.9	ZAR	2008	Effective
454	SC1345	NA	vanWilgen2017	An assessment of the evolution, costs and effectiveness of alien plant control operations in Kruger National Park, South Africa	van Wilgen, B.W., Fill, J.M., Govender, N., Foxcroft, L.C.	Alien plants were first recorded in 1937 in the 2 million ha Kruger National Park (KNP, a savanna protected area in South Africa), and attempts to control them began in the mid-1950s. The invasive alien plant control program expanded substantially in the late 1990s, but its overall efficacy has not been determined. We present an assessment of invasive alien plant control operations over several d…	2017	English	Peer-reviewed article	NA	Yes	Plantae	Tracheophyta	Magnoliopsida	Myrtales	Myrtaceae	Psidium	Psidium guajava	NA	Guava	Terrestrial	terrestrial	N	NA	4	Y	Africa	South Africa	NA	Kruger National Park	Site	1997-2016	Period	1997	2016	1997	2016	Potentially ongoing	4600000	NA	NA	319382	798846	230000	15969.1	39942.3	ZAR	2016	Effective
455	SC1356	NA	vanWilgen2017	An assessment of the evolution, costs and effectiveness of alien plant control operations in Kruger National Park, South Africa	van Wilgen, B.W., Fill, J.M., Govender, N., Foxcroft, L.C.	Alien plants were first recorded in 1937 in the 2 million ha Kruger National Park (KNP, a savanna protected area in South Africa), and attempts to control them began in the mid-1950s. The invasive alien plant control program expanded substantially in the late 1990s, but its overall efficacy has not been determined. We present an assessment of invasive alien plant control operations over several d…	2017	English	Peer-reviewed article	NA	Yes	Plantae	Tracheophyta	Magnoliopsida	Sapindales	Meliaceae	Melia	Melia azedarach	NA	Syringas	Terrestrial	terrestrial	N	NA	4	Y	Africa	South Africa	NA	Kruger National Park	Site	1997-2016	Period	1997	2016	1997	2016	Potentially ongoing	4900000	NA	NA	340211	850945	245000	17010.6	42547.3	ZAR	2016	Effective
456	SC1367	NA	vanWilgen2017	An assessment of the evolution, costs and effectiveness of alien plant control operations in Kruger National Park, South Africa	van Wilgen, B.W., Fill, J.M., Govender, N., Foxcroft, L.C.	Alien plants were first recorded in 1937 in the 2 million ha Kruger National Park (KNP, a savanna protected area in South Africa), and attempts to control them began in the mid-1950s. The invasive alien plant control program expanded substantially in the late 1990s, but its overall efficacy has not been determined. We present an assessment of invasive alien plant control operations over several d…	2017	English	Peer-reviewed article	NA	Yes	Plantae	Tracheophyta	Magnoliopsida	Caryophyllales	Cactaceae	Opuntia	Opuntia sp.	NA	Prickly pear	Terrestrial	terrestrial	N	NA	4	Y	Africa	South Africa	NA	Kruger National Park	Site	1997-2016	Period	1997	2016	1997	2016	Potentially ongoing	5200000	NA	NA	361041	903044	260000	18052	45152.2	ZAR	2016	Effective
458	SC1375	NA	vanWilgen2017	An assessment of the evolution, costs and effectiveness of alien plant control operations in Kruger National Park, South Africa	van Wilgen, B.W., Fill, J.M., Govender, N., Foxcroft, L.C.	Alien plants were first recorded in 1937 in the 2 million ha Kruger National Park (KNP, a savanna protected area in South Africa), and attempts to control them began in the mid-1950s. The invasive alien plant control program expanded substantially in the late 1990s, but its overall efficacy has not been determined. We present an assessment of invasive alien plant control operations over several d…	2017	English	Peer-reviewed article	NA	Yes	Plantae	Tracheophyta	Magnoliopsida	Asterales	Asteraceae	Tithonia	Tithonia diversifolia	NA	Tree marigold	Terrestrial	terrestrial	N	NA	4	Y	Africa	South Africa	NA	Kruger National Park	Site	1997-2016	Period	1997	2016	1997	2016	Potentially ongoing	5400000	NA	NA	374927	937776	270000	18746.3	46888.8	ZAR	2016	Effective
459	SC1380	NA	7870	An assessment of the effectiveness of a large, national-scale invasive alien plant control strategy in South Africa	van Wilgen, B. W., Forsyth, G. G., Le Maitre, D. C. , Wannenburgh, A., Kotze, J. D. F., van den Berg, E., Henderson, L.	This paper presents an assessment of a large, national-scale alien plant control program that has operated in South Africa for 15 years. We reviewed data from three national-level estimates of the extent of invasion, records of the costs and spatial extent of invasive species control operations, assessments of the effectiveness of biological control, and smaller-scale studies. The 19 most importa…	2012	English	Peer-reviewed article	NA	Yes	Plantae	Tracheophyta	Liliopsida	Poales	Poaceae	Arundo	Arundo donax	NA	Giant reed	Terrestrial	terrestrial	N	Albany thicket biome	1	N	Africa	South Africa	NA	Albany Thicket Biome	Site	1995-2008	Period	1995	2009	1995	2009	Potentially ongoing	5700000	NA	NA	785524	1.59099e+06	380000	52368.3	106066	ZAR	2008	Effective
460	SC1383	NA	vanWilgen2017	An assessment of the evolution, costs and effectiveness of alien plant control operations in Kruger National Park, South Africa	van Wilgen, B.W., Fill, J.M., Govender, N., Foxcroft, L.C.	Alien plants were first recorded in 1937 in the 2 million ha Kruger National Park (KNP, a savanna protected area in South Africa), and attempts to control them began in the mid-1950s. The invasive alien plant control program expanded substantially in the late 1990s, but its overall efficacy has not been determined. We present an assessment of invasive alien plant control operations over several d…	2017	English	Peer-reviewed article	NA	Yes	Plantae	Tracheophyta	Magnoliopsida	Lamiales	Bignoniaceae	Tecoma	Tecoma stans	NA	Yellow elder	Terrestrial	terrestrial	N	NA	4	Y	Africa	South Africa	NA	Kruger National Park	Site	1997-2016	Period	1997	2016	1997	2016	Potentially ongoing	5940000	NA	NA	412419	1.03155e+06	297000	20621	51577.7	ZAR	2016	Effective
461	SC1388	NA	Hosking2002	Evaluating the environmental use of water - Selected case studies in the eastern and southern cape	Hosking SG; du Preez M; Campbell E.E; Wooldrige T.H. & du Plessis L.L.	South Africa is a drought-prone, water-poor region (Burgers, Marais & Bekker 1995:101). It has a mean annual rainfall of only 502mm and a mean annual runoff of only 42mm (420m3/ha/a) and for these reasons it seems very probable that water shortages will limit economic development in South Africa during the Twenty-first century (Briers & Powell 1993:1). Consequently, it is imperative that its wate…	2002	English	Official report	NA	Yes	Plantae	Tracheophyta	Magnoliopsida	Diverse/Unspecified	Diverse/Unspecified	Diverse/Unspecified	Diverse/Unspecified	NA	Trees (Acacias, pines, hakeas and populus)	Terrestrial	terrestrial	N	Grassy fynbos, valley bushveld	3	N	Africa	South Africa	NA	Port Elizabeth Driftsands	Site	Approximately between 2004 and 2013	Year	2002	2011	2002	2011	Potentially ongoing	6090000	NA	NA	787323	2.61641e+06	6090000	787323	2.61641e+06	ZAR	2002	Publication year
462	SC1390	WoS	Bekele2018	Economic impacts ofÂ Prosopis spp. invasions on dryland ecosystem services in Ethiopia and Kenya: Evidence from choice experimental data	Bekele et al.	Biological invasions can induce trajectories of changes that make ecosystems fragile and less reliable in providing services and goods. Here we set out to assess the economic value of dry land ecosystem services affected by the invasive tree Prosopis, which was originally introduced in Africa and elsewhere for providing firewood, animal fodder and other services to rural people. Based on choice e…	2018	English	Peer-reviewed article	NA	Yes	Plantae	Tracheophyta	Magnoliopsida	Fabales	Fabaceae	Prosopis	Prosopis juliflora	NA	Prosopis	Terrestrial	terrestrial	N	Main vegetation types in the study area comprise bush land, shrub land, riverine forests, grasslands and seasonal marshes and swamps	3\4\9\10	N	Africa	Ethiopia	NA	Afar Region	Site	NA	Year	NA	NA	2018	2018	Potentially ongoing	6100000	NA	NA	5.95456e+06	1.63797e+07	6100000	5.95456e+06	1.63797e+07	USD	2018	Publication year
463	SC1398	NA	LeMaitre2002	Invasive alien trees and water resources in South Africa: case studies of the costs and benefits of management	Le Maitre, D. C., van Wilgen, B.W., Gelderblom, C. M., Bailey, C., Chapman, R.A. and Nel, J.A.	Invasive alien plants are consumptive water-users, and may have reduced river flows in South Africa by about 6.7% according to a broad-scale study. An effective programme to bring the invasions under control would cost about US$ 92 million per year for the next 20 years. This paper reports on studies of four representative catchments (the Sonderend, Keurbooms, Upper Wilge and Sabie-Sand) to asses…	2002	English	Peer-reviewed article	NA	Yes	Plantae	Diverse/Unspecified	Diverse/Unspecified	Diverse/Unspecified	Diverse/Unspecified	Diverse/Unspecified	Diverse/Unspecified	NA	NA	Terrestrial	terrestrial	N	NA	NA	N	Africa	South Africa	NA	Sabie-sand	Unit (6322 km2)	2000	Period	2000	2000	2000	2000	One-time	6600000	NA	NA	8.99396e+06	2.98884e+07	6600000	8.99396e+06	2.98884e+07	USD	2002	Publication year
464	SC1399	NA	Wise2012	Costs, benefits and management options for an invasive alien tree species: The case of mesquite in the Northern Cape, South Africa	Wise, R.M., van Wilgen, B.W., Le Maitre, D. C.	Mesquite (Prosopis species) were introduced to South Africa to provide fodder and shade for livestock, but some have become invasive, impacting on water and grazing resources. Mesquiteâ€™s net economic effects are unclear and their unequal distribution leads to conflict. We estimated the value of mesquite invasions in the Northern Cape Province for different scenarios, differentiating between pro…	2012	English	Peer-reviewed article	Department of Water Affairs and Forestry, 2008. Working for Water Information Management System (WIMS) e 2001 to 2006 Data for All Prosopis Operations in South Africa, Cape Town. Department of Water Affairs and Forestry (DWAF).	Yes	Plantae	Tracheophyta	Magnoliopsida	Fabales	Fabaceae	Prosopis	Prosopis sp.	NA	Mesquite	Terrestrial	terrestrial	N	NA	NA	N	Africa	South Africa	NA	Northern Cape	Unit(58,077 ha)	2010-2041	Year	2010	2041	2010	2041	Potentially ongoing	6600000	NA	NA	7.04631e+06	1.17306e+07	6600000	7.04631e+06	1.17306e+07	USD	2012	Publication year
465	SC1402	NA	7870	An assessment of the effectiveness of a large, national-scale invasive alien plant control strategy in South Africa	van Wilgen, B. W., Forsyth, G. G., Le Maitre, D. C. , Wannenburgh, A., Kotze, J. D. F., van den Berg, E., Henderson, L.	This paper presents an assessment of a large, national-scale alien plant control program that has operated in South Africa for 15 years. We reviewed data from three national-level estimates of the extent of invasion, records of the costs and spatial extent of invasive species control operations, assessments of the effectiveness of biological control, and smaller-scale studies. The 19 most importa…	2012	English	Peer-reviewed article	NA	Yes	Plantae	Tracheophyta	Magnoliopsida	Malpighiales	Salicaceae	Populus	Populus spp.	NA	Poplars/Aspens/Cottonwoods	Terrestrial	terrestrial	N	Fynbos	3	N	Africa	South Africa	NA	Fynbos Biome	Site	1995-2008	Period	1995	2008	1995	2009	Potentially ongoing	6700000	NA	NA	923335	1.87011e+06	446667	61555.7	124674	ZAR	2008	Effective
466	SC1403	NA	7870	An assessment of the effectiveness of a large, national-scale invasive alien plant control strategy in South Africa	van Wilgen, B. W., Forsyth, G. G., Le Maitre, D. C. , Wannenburgh, A., Kotze, J. D. F., van den Berg, E., Henderson, L.	This paper presents an assessment of a large, national-scale alien plant control program that has operated in South Africa for 15 years. We reviewed data from three national-level estimates of the extent of invasion, records of the costs and spatial extent of invasive species control operations, assessments of the effectiveness of biological control, and smaller-scale studies. The 19 most importa…	2012	English	Peer-reviewed article	NA	Yes	Plantae	Tracheophyta	Magnoliopsida	Fabales	Fabaceae	Acacia	Acacia mearnsii	NA	Black wattle	Terrestrial	terrestrial	N	Albany thicket biome	1	N	Africa	South Africa	NA	Albany Thicket Biome	Site	1995-2008	Period	1995	2008	1995	2009	Potentially ongoing	6700000	NA	NA	923335	1.87011e+06	446667	61555.7	124674	ZAR	2008	Effective
467	SC1412	NA	vanWilgen2017	An assessment of the evolution, costs and effectiveness of alien plant control operations in Kruger National Park, South Africa	van Wilgen, B.W., Fill, J.M., Govender, N., Foxcroft, L.C.	Alien plants were first recorded in 1937 in the 2 million ha Kruger National Park (KNP, a savanna protected area in South Africa), and attempts to control them began in the mid-1950s. The invasive alien plant control program expanded substantially in the late 1990s, but its overall efficacy has not been determined. We present an assessment of invasive alien plant control operations over several d…	2017	English	Peer-reviewed article	NA	Yes	Plantae	Tracheophyta	Magnoliopsida	Solanales	Solanaceae	Solanum	Solanum seaforthianum	NA	Bugweed	Terrestrial	terrestrial	N	NA	4	Y	Africa	South Africa	NA	Kruger National Park	Site	1997-2016	Period	1997	2016	1997	2016	Potentially ongoing	7100000	NA	NA	492959	1.233e+06	355000	24648	61650.1	ZAR	2016	Effective
468	SC1416	NA	7477	Evaluating the cost-effectiveness of invasive alien plant clearing: A case study from South Africa	McConnachie, M. M., Cowling, R. M. van Wilgen, B. W. McConnachie, D. A.	Conservation projects spend billions of dollars clearing invasive alien plants, yet few studies have measured the cost-effectiveness of doing this, especially over larger spatial and temporal scales, relevant to operational contexts. We evaluated the cost-effectiveness of South Africaâ€™s national invasive alien plant control programme, Working for Water, in reducing invasive alien plant cover in…	2012	English	Peer-reviewed article	NA	Yes	Plantae	Tracheophyta	Magnoliopsida	Fabales	Fabaceae	Acacia	Acacia mearnsii	NA	Black wattle	Terrestrial	terrestrial	N	NA	NA	N	Africa	South Africa	NA	Kouga River Catchment	Unit (2426 km2)	6 years (2002-2008)	Period	2002	2008	2002	2008	One-time	7350000	NA	NA	1.12853e+06	1.80603e+06	1050000	161219	258004	ZAR	2010	Effective
469	SC1418	NA	7870	An assessment of the effectiveness of a large, national-scale invasive alien plant control strategy in South Africa	van Wilgen, B. W., Forsyth, G. G., Le Maitre, D. C. , Wannenburgh, A., Kotze, J. D. F., van den Berg, E., Henderson, L.	This paper presents an assessment of a large, national-scale alien plant control program that has operated in South Africa for 15 years. We reviewed data from three national-level estimates of the extent of invasion, records of the costs and spatial extent of invasive species control operations, assessments of the effectiveness of biological control, and smaller-scale studies. The 19 most importa…	2012	English	Peer-reviewed article	NA	Yes	Plantae	Tracheophyta	Magnoliopsida	Fabales	Fabaceae	Acacia	Acacia cyclops	NA	Rooikrans	Terrestrial	terrestrial	N	Albany thicket biome	1	N	Africa	South Africa	NA	Albany Thicket Biome	Site	1995-2008	Period	1995	2009	1995	2009	Potentially ongoing	7500000	NA	NA	1.03358e+06	2.09341e+06	500000	68905.6	139561	ZAR	2008	Effective
470	SC1420	GS	NA	Tomato leafminer (Tuta absoluta): Impacts and coping strategies for Africa	Rwomushana et al.	The recently introduced tomato leafminer, Tuta absoluta, has become the most important pest constraint to tomato production in Africa. Spreading at an average 800 km/year, it is now present in 41 African countries. The socio-economic impacts of Tuta absoluta were assessed through a household survey in Kenya and Zambia in 2018, covering 400 respondents in Kenya and 426 in Zambia. We found that 97.…	2019	English	Working paper	NA	Yes	Animalia	Arthropoda	Insecta	Lepidoptera	Gelechiidae	Tuta	Tuta absoluta	NA	Tomato leafminer or Tuta absoluta	Terrestrial	terrestrial	N	NA	12b	N	Africa	Malawi	NA	NA	Country	2018	Year	2018	2018	2018	2018	Potentially ongoing	7700000	NA	NA	7.51641e+06	2.53057e+07	7700000	7.51641e+06	2.53057e+07	USD	2018	Effective
471	SC1421	NA	7477	Evaluating the cost-effectiveness of invasive alien plant clearing: A case study from South Africa	McConnachie, M. M., Cowling, R. M. van Wilgen, B. W. McConnachie, D. A.	Conservation projects spend billions of dollars clearing invasive alien plants, yet few studies have measured the cost-effectiveness of doing this, especially over larger spatial and temporal scales, relevant to operational contexts. We evaluated the cost-effectiveness of South Africaâ€™s national invasive alien plant control programme, Working for Water, in reducing invasive alien plant cover in…	2012	English	Peer-reviewed article	NA	Yes	Plantae	Tracheophyta	Magnoliopsida	Fabales	Fabaceae	Acacia	Acacia mearnsii	NA	Black wattle	Terrestrial	terrestrial	N	NA	NA	N	Africa	South Africa	NA	Krom River Catchment	Unit (1556 km2)	6 years (2002-2008)	Period	2002	2008	2002	2008	One-time	7750000	NA	NA	1.18995e+06	1.90431e+06	1.10714e+06	169993	272045	ZAR	2010	Effective
472	SC1422	NA	7870	An assessment of the effectiveness of a large, national-scale invasive alien plant control strategy in South Africa	van Wilgen, B. W., Forsyth, G. G., Le Maitre, D. C. , Wannenburgh, A., Kotze, J. D. F., van den Berg, E., Henderson, L.	This paper presents an assessment of a large, national-scale alien plant control program that has operated in South Africa for 15 years. We reviewed data from three national-level estimates of the extent of invasion, records of the costs and spatial extent of invasive species control operations, assessments of the effectiveness of biological control, and smaller-scale studies. The 19 most importa…	2012	English	Peer-reviewed article	NA	Yes	Plantae	Tracheophyta	Magnoliopsida	Caryophyllales	Cactaceae	Diverse/Unspecified	Diverse/Unspecified	NA	Cacti	Terrestrial	terrestrial	N	Albany thicket biome	1	N	Africa	South Africa	NA	Albany Thicket Biome	Site	1995-2008	Period	1995	2009	1995	2009	Potentially ongoing	7800000	NA	NA	1.07493e+06	2.17715e+06	520000	71661.8	145143	ZAR	2008	Effective
473	SC1425	NA	Hosking2002	Evaluating the environmental use of water - Selected case studies in the eastern and southern cape	Hosking SG; du Preez M; Campbell E.E; Wooldrige T.H. & du Plessis L.L.	South Africa is a drought-prone, water-poor region (Burgers, Marais & Bekker 1995:101). It has a mean annual rainfall of only 502mm and a mean annual runoff of only 42mm (420m3/ha/a) and for these reasons it seems very probable that water shortages will limit economic development in South Africa during the Twenty-first century (Briers & Powell 1993:1). Consequently, it is imperative that its wate…	2002	English	Official report	NA	Yes	Plantae	Tracheophyta	Magnoliopsida	Diverse/Unspecified	Diverse/Unspecified	Diverse/Unspecified	Diverse/Unspecified	NA	Trees (Acacias, pines, hakeas and populus)	Terrestrial	terrestrial	N	Grassy fynbos	3	N	Africa	South Africa	NA	Kouga	Site	Approximately between 2004 and 2013	Year	2002	2011	2002	2011	Potentially ongoing	7933900	NA	NA	1.02571e+06	3.40859e+06	7933900	1.02571e+06	3.40859e+06	ZAR	2002	Publication year
474	SC1429	NA	7870	An assessment of the effectiveness of a large, national-scale invasive alien plant control strategy in South Africa	van Wilgen, B. W., Forsyth, G. G., Le Maitre, D. C. , Wannenburgh, A., Kotze, J. D. F., van den Berg, E., Henderson, L.	This paper presents an assessment of a large, national-scale alien plant control program that has operated in South Africa for 15 years. We reviewed data from three national-level estimates of the extent of invasion, records of the costs and spatial extent of invasive species control operations, assessments of the effectiveness of biological control, and smaller-scale studies. The 19 most importa…	2012	English	Peer-reviewed article	NA	Yes	Plantae	Tracheophyta	Magnoliopsida	Caryophyllales	Cactaceae	Diverse/Unspecified	Diverse/Unspecified	NA	Cactus	Terrestrial	terrestrial	N	Mois savanna biome	4	N	Africa	South Africa	NA	Mois Savanna Biome	Site	1995-2008	Period	1995	2008	1995	2009	Potentially ongoing	8100000	NA	NA	1.11627e+06	2.26088e+06	540000	74418.1	150726	ZAR	2008	Effective
475	SC1431	NA	vanWilgen2016	Historical costs and projected future scenarios for the management of invasive alien plants in protected areas in the Cape Floristic Region	van Wilgen, B.W., Fill, J.M., Baard, J., Cheney, C., Forsyth, A.T. and Kraaij, T.	Scarce funds for conservation need to be optimally used, yet there are few studies that record the costs and projected outcomes of major conservation efforts. Here we document the historical costs and extent of efforts to control invasive alien plants in the protected areas of the Cape Floristic Region of South Africa, a biodiversity hotspot of global importance. We also estimate the resources th…	2016	English	Peer-reviewed article	NA	Yes	Plantae	Tracheophyta	Magnoliopsida	Salicales	Salicaceae	Populus	Populus sp.	NA	Poplars	Terrestrial	terrestrial	N	NA	NA	Y	Africa	South Africa	NA	Western Cape Province	Unit (750 000 ha)	1995â€“2015	Period	1995	2015	1995	2015	One-time	8100000	NA	NA	656552	1.51054e+06	385714	31264.4	71930.5	ZAR	2015	Effective
476	SC1432	NA	vanWilgen2017	An assessment of the evolution, costs and effectiveness of alien plant control operations in Kruger National Park, South Africa	van Wilgen, B.W., Fill, J.M., Govender, N., Foxcroft, L.C.	Alien plants were first recorded in 1937 in the 2 million ha Kruger National Park (KNP, a savanna protected area in South Africa), and attempts to control them began in the mid-1950s. The invasive alien plant control program expanded substantially in the late 1990s, but its overall efficacy has not been determined. We present an assessment of invasive alien plant control operations over several d…	2017	English	Peer-reviewed article	NA	Yes	Plantae	Tracheophyta	Magnoliopsida	Solanales	Solanaceae	Nicotiana	Nicotiana sp.	NA	Tobacco	Terrestrial	terrestrial	N	NA	4	Y	Africa	South Africa	NA	Kruger National Park	Site	1997-2016	Period	1997	2016	1997	2016	Potentially ongoing	8100000	NA	NA	562390	1.40666e+06	405000	28119.5	70333.2	ZAR	2016	Effective
477	SC1434	NA	vanWilgen2017	An assessment of the evolution, costs and effectiveness of alien plant control operations in Kruger National Park, South Africa	van Wilgen, B.W., Fill, J.M., Govender, N., Foxcroft, L.C.	Alien plants were first recorded in 1937 in the 2 million ha Kruger National Park (KNP, a savanna protected area in South Africa), and attempts to control them began in the mid-1950s. The invasive alien plant control program expanded substantially in the late 1990s, but its overall efficacy has not been determined. We present an assessment of invasive alien plant control operations over several d…	2017	English	Peer-reviewed article	NA	Yes	Plantae	Tracheophyta	Liliopsida	Asparagales	Agavaceae	Agave	Agave sisalana	NA	Sisal	Terrestrial	terrestrial	N	NA	4	Y	Africa	South Africa	NA	Kruger National Park	Site	1997-2016	Period	1997	2016	1997	2016	Potentially ongoing	8120000	NA	NA	563779	1.41014e+06	406000	28188.9	70506.9	ZAR	2016	Effective
478	SC1441	NA	Hosking2002	Evaluating the environmental use of water - Selected case studies in the eastern and southern cape	Hosking SG; du Preez M; Campbell E.E; Wooldrige T.H. & du Plessis L.L.	South Africa is a drought-prone, water-poor region (Burgers, Marais & Bekker 1995:101). It has a mean annual rainfall of only 502mm and a mean annual runoff of only 42mm (420m3/ha/a) and for these reasons it seems very probable that water shortages will limit economic development in South Africa during the Twenty-first century (Briers & Powell 1993:1). Consequently, it is imperative that its wate…	2002	English	Official report	NA	Yes	Plantae	Tracheophyta	Magnoliopsida	Diverse/Unspecified	Diverse/Unspecified	Diverse/Unspecified	Diverse/Unspecified	NA	Trees (Acacias, pines, hakeas and populus)	Terrestrial	terrestrial	N	Mountain fynbos	3	Y	Africa	South Africa	NA	Tsitsikamma	Site	Approximately between 2004 and 2013	Year	2002	2011	2002	2011	Potentially ongoing	8370895	NA	NA	1.0822e+06	3.59633e+06	8370895	1.0822e+06	3.59633e+06	ZAR	2002	Publication year
479	SC1446	NA	Hosking2002	Evaluating the environmental use of water - Selected case studies in the eastern and southern cape	Hosking SG; du Preez M; Campbell E.E; Wooldrige T.H. & du Plessis L.L.	South Africa is a drought-prone, water-poor region (Burgers, Marais & Bekker 1995:101). It has a mean annual rainfall of only 502mm and a mean annual runoff of only 42mm (420m3/ha/a) and for these reasons it seems very probable that water shortages will limit economic development in South Africa during the Twenty-first century (Briers & Powell 1993:1). Consequently, it is imperative that its wate…	2002	English	Official report	NA	Yes	Plantae	Tracheophyta	Magnoliopsida	Diverse/Unspecified	Diverse/Unspecified	Diverse/Unspecified	Diverse/Unspecified	NA	Trees (Acacias, pines, hakeas and populus)	Terrestrial	terrestrial	N	Grassy fynbos	3	N	Africa	South Africa	NA	Albany	Site	Approximately between 2004 and 2013	Year	2002	2011	2002	2011	Potentially ongoing	8550000	NA	NA	1.10536e+06	3.67328e+06	8550000	1.10536e+06	3.67328e+06	ZAR	2002	Publication year
480	SC1453	NA	7870	An assessment of the effectiveness of a large, national-scale invasive alien plant control strategy in South Africa	van Wilgen, B. W., Forsyth, G. G., Le Maitre, D. C. , Wannenburgh, A., Kotze, J. D. F., van den Berg, E., Henderson, L.	This paper presents an assessment of a large, national-scale alien plant control program that has operated in South Africa for 15 years. We reviewed data from three national-level estimates of the extent of invasion, records of the costs and spatial extent of invasive species control operations, assessments of the effectiveness of biological control, and smaller-scale studies. The 19 most importa…	2012	English	Peer-reviewed article	NA	Yes	Plantae	Tracheophyta	Magnoliopsida	Malpighiales	Salicaceae	Salix	Salix babylonica	NA	Babylon willow/Weeping willow	Terrestrial	terrestrial	N	Grassland biome (excluding arid areas)	4	N	Africa	South Africa	NA	Grassland Biome (excluding Arid Areas)	Site	1995-2008	Period	1995	2008	1995	2009	Potentially ongoing	8700000	NA	NA	1.19896e+06	2.42836e+06	580000	79930.5	161891	ZAR	2008	Effective
481	SC1454	GS	NA	Tomato leafminer (Tuta absoluta): Impacts and coping strategies for Africa	Rwomushana et al.	The recently introduced tomato leafminer, Tuta absoluta, has become the most important pest constraint to tomato production in Africa. Spreading at an average 800 km/year, it is now present in 41 African countries. The socio-economic impacts of Tuta absoluta were assessed through a household survey in Kenya and Zambia in 2018, covering 400 respondents in Kenya and 426 in Zambia. We found that 97.…	2019	English	Working paper	NA	Yes	Animalia	Arthropoda	Insecta	Lepidoptera	Gelechiidae	Tuta	Tuta absoluta	NA	Tomato leafminer or Tuta absoluta	Terrestrial	terrestrial	N	Tomato farmers across Zambia's agro-ecological zones (i.e., 1, 2a, 2b and 3)	12b	N	Africa	Zambia	NA	Seven Provinces (Unspecified)	Country	2018	Year	2018	2018	2018	2018	Potentially ongoing	8700000	NA	NA	8.49256e+06	2.3295e+07	8700000	8.49256e+06	2.3295e+07	USD	2018	Effective
482	SC1461	NA	7870	An assessment of the effectiveness of a large, national-scale invasive alien plant control strategy in South Africa	van Wilgen, B. W., Forsyth, G. G., Le Maitre, D. C. , Wannenburgh, A., Kotze, J. D. F., van den Berg, E., Henderson, L.	This paper presents an assessment of a large, national-scale alien plant control program that has operated in South Africa for 15 years. We reviewed data from three national-level estimates of the extent of invasion, records of the costs and spatial extent of invasive species control operations, assessments of the effectiveness of biological control, and smaller-scale studies. The 19 most importa…	2012	English	Peer-reviewed article	NA	Yes	Plantae	Tracheophyta	Magnoliopsida	Myrtales	Myrtaceae	Eucalyptus	Eucalyptus spp.	NA	Gums	Terrestrial	terrestrial	N	Forest biome	1	N	Africa	South Africa	NA	Forest Biome	Site	1995-2008	Period	1995	2008	1995	2009	Potentially ongoing	9100000	NA	NA	1.25408e+06	2.54001e+06	606667	83605.5	169334	ZAR	2008	Effective
483	SC1463	TC	EMTC_15	Costs and benefits of biological control of invasive alien plants: case studies from South Africa	Van Wilgen et al	NA	2004	English	Peer-reviewed article	NA	Yes	Plantae	Tracheophyta	Magnoliopsida	Proteales	Proteaceae	Hakea	Hakea sericea	NA	Silky Hakea	Terrestrial	terrestrial	N	NA	NA	N	Africa	South Africa	NA	South Africa	Country	1965-2000	Period	1965	2000	1965	2000	One-time	9200000	NA	NA	1.88705e+06	4.80362e+06	255556	52418.1	133434	ZAR	2000	Effective
484	SC1465	NA	vanWilgen2017	An assessment of the evolution, costs and effectiveness of alien plant control operations in Kruger National Park, South Africa	van Wilgen, B.W., Fill, J.M., Govender, N., Foxcroft, L.C.	Alien plants were first recorded in 1937 in the 2 million ha Kruger National Park (KNP, a savanna protected area in South Africa), and attempts to control them began in the mid-1950s. The invasive alien plant control program expanded substantially in the late 1990s, but its overall efficacy has not been determined. We present an assessment of invasive alien plant control operations over several d…	2017	English	Peer-reviewed article	NA	Yes	Plantae	Diverse/Unspecified	Diverse/Unspecified	Diverse/Unspecified	Diverse/Unspecified	Diverse/Unspecified	Diverse/Unspecified	NA	Diverse/Unspecified	Terrestrial	terrestrial	N	NA	4	Y	Africa	South Africa	NA	Kruger National Park	Site	1997-2016	Period	1997	2016	1997	2016	Potentially ongoing	9300000	NA	NA	645707	1.61506e+06	465000	32285.4	80752.9	ZAR	2016	Effective
485	SC1473	NA	Wise2012	Costs, benefits and management options for an invasive alien tree species: The case of mesquite in the Northern Cape, South Africa	Wise, R.M., van Wilgen, B.W., Le Maitre, D. C.	Mesquite (Prosopis species) were introduced to South Africa to provide fodder and shade for livestock, but some have become invasive, impacting on water and grazing resources. Mesquiteâ€™s net economic effects are unclear and their unequal distribution leads to conflict. We estimated the value of mesquite invasions in the Northern Cape Province for different scenarios, differentiating between pro…	2012	English	Peer-reviewed article	Department of Water Affairs and Forestry, 2008. Working for Water Information Management System (WIMS) e 2001 to 2006 Data for All Prosopis Operations in South Africa, Cape Town. Department of Water Affairs and Forestry (DWAF).	Yes	Plantae	Tracheophyta	Magnoliopsida	Fabales	Fabaceae	Prosopis	Prosopis sp.	NA	Mesquite	Terrestrial	terrestrial	N	NA	NA	N	Africa	South Africa	NA	Northern Cape	Unit(51,455 ha)	2010-2041	Year	2010	2041	2010	2041	Potentially ongoing	9500000	NA	NA	1.01424e+07	1.68849e+07	9500000	1.01424e+07	1.68849e+07	USD	2012	Publication year
486	SC1478	NA	vanWilgen2016	Historical costs and projected future scenarios for the management of invasive alien plants in protected areas in the Cape Floristic Region	van Wilgen, B.W., Fill, J.M., Baard, J., Cheney, C., Forsyth, A.T. and Kraaij, T.	Scarce funds for conservation need to be optimally used, yet there are few studies that record the costs and projected outcomes of major conservation efforts. Here we document the historical costs and extent of efforts to control invasive alien plants in the protected areas of the Cape Floristic Region of South Africa, a biodiversity hotspot of global importance. We also estimate the resources th…	2016	English	Peer-reviewed article	NA	Yes	Plantae	Tracheophyta	Magnoliopsida	Salicales	Salicaceae	Populus	Populus sp.	NA	Poplars	Terrestrial	terrestrial	N	NA	NA	Y	Africa	South Africa	NA	Western Cape Province	Unit (750 000 ha)	future	Period	2015	2035	2015	2035	One-time	9800000	NA	NA	794347	1.82757e+06	466667	37826.1	87027	ZAR	2015	Effective
487	SC1481	NA	7870	An assessment of the effectiveness of a large, national-scale invasive alien plant control strategy in South Africa	van Wilgen, B. W., Forsyth, G. G., Le Maitre, D. C. , Wannenburgh, A., Kotze, J. D. F., van den Berg, E., Henderson, L.	This paper presents an assessment of a large, national-scale alien plant control program that has operated in South Africa for 15 years. We reviewed data from three national-level estimates of the extent of invasion, records of the costs and spatial extent of invasive species control operations, assessments of the effectiveness of biological control, and smaller-scale studies. The 19 most importa…	2012	English	Peer-reviewed article	NA	Yes	Plantae	Tracheophyta	Magnoliopsida	Fabales	Fabaceae	Acacia	Acacia melanoxylon	NA	Australian blackwood	Terrestrial	terrestrial	N	Forest biome	1	N	Africa	South Africa	NA	Forest Biome	Site	1995-2008	Period	1995	2008	1995	2009	Potentially ongoing	9900000	NA	NA	1.36433e+06	2.7633e+06	660000	90955.4	184220	ZAR	2008	Effective
488	SC1482	NA	LeMaitre2002	Invasive alien trees and water resources in South Africa: case studies of the costs and benefits of management	Le Maitre, D. C., van Wilgen, B.W., Gelderblom, C. M., Bailey, C., Chapman, R.A. and Nel, J.A.	Invasive alien plants are consumptive water-users, and may have reduced river flows in South Africa by about 6.7% according to a broad-scale study. An effective programme to bring the invasions under control would cost about US$ 92 million per year for the next 20 years. This paper reports on studies of four representative catchments (the Sonderend, Keurbooms, Upper Wilge and Sabie-Sand) to asses…	2002	English	Peer-reviewed article	NA	Yes	Plantae	Diverse/Unspecified	Diverse/Unspecified	Diverse/Unspecified	Diverse/Unspecified	Diverse/Unspecified	Diverse/Unspecified	NA	NA	Terrestrial	terrestrial	N	NA	NA	N	Africa	South Africa	NA	Keurbooms	Unit (1380 km2)	2000	Period	2000	2000	2000	2000	One-time	9900000	NA	NA	1.34909e+07	4.48326e+07	9900000	1.34909e+07	4.48326e+07	USD	2002	Publication year
489	SC1488	NA	vanWilgen2017	An assessment of the evolution, costs and effectiveness of alien plant control operations in Kruger National Park, South Africa	van Wilgen, B.W., Fill, J.M., Govender, N., Foxcroft, L.C.	Alien plants were first recorded in 1937 in the 2 million ha Kruger National Park (KNP, a savanna protected area in South Africa), and attempts to control them began in the mid-1950s. The invasive alien plant control program expanded substantially in the late 1990s, but its overall efficacy has not been determined. We present an assessment of invasive alien plant control operations over several d…	2017	English	Peer-reviewed article	NA	Yes	Plantae	Tracheophyta	Magnoliopsida	Sapindales	Sapindaceae	Cardiospermum	Cardiospermum sp.	NA	Soapberry	Terrestrial	terrestrial	N	NA	4	Y	Africa	South Africa	NA	Kruger National Park	Site	1997-2016	Period	1997	2016	1997	2016	Potentially ongoing	10200000	NA	NA	708195	1.77135e+06	510000	35409.7	88567.7	ZAR	2016	Effective
490	SC1501	NA	LeMaitre2002	Invasive alien trees and water resources in South Africa: case studies of the costs and benefits of management	Le Maitre, D. C., van Wilgen, B.W., Gelderblom, C. M., Bailey, C., Chapman, R.A. and Nel, J.A.	Invasive alien plants are consumptive water-users, and may have reduced river flows in South Africa by about 6.7% according to a broad-scale study. An effective programme to bring the invasions under control would cost about US$ 92 million per year for the next 20 years. This paper reports on studies of four representative catchments (the Sonderend, Keurbooms, Upper Wilge and Sabie-Sand) to asses…	2002	English	Peer-reviewed article	NA	Yes	Plantae	Diverse/Unspecified	Diverse/Unspecified	Diverse/Unspecified	Diverse/Unspecified	Diverse/Unspecified	Diverse/Unspecified	NA	NA	Terrestrial	terrestrial	N	NA	NA	N	Africa	South Africa	NA	Sabie-sand	Unit (6322 km2)	2000	Period	2000	2000	2000	2000	One-time	11100000	NA	NA	1.51262e+07	5.02669e+07	11100000	1.51262e+07	5.02669e+07	USD	2002	Publication year
491	SC1506	GS	NA	Tomato leafminer (Tuta absoluta): Impacts and coping strategies for Africa	Rwomushana et al.	The recently introduced tomato leafminer, Tuta absoluta, has become the most important pest constraint to tomato production in Africa. Spreading at an average 800 km/year, it is now present in 41 African countries. The socio-economic impacts of Tuta absoluta were assessed through a household survey in Kenya and Zambia in 2018, covering 400 respondents in Kenya and 426 in Zambia. We found that 97.…	2019	English	Working paper	NA	Yes	Animalia	Arthropoda	Insecta	Lepidoptera	Gelechiidae	Tuta	Tuta absoluta	NA	Tomato leafminer or Tuta absoluta	Terrestrial	terrestrial	N	NA	12b	N	Africa	Mali	NA	NA	Country	2018	Year	2018	2018	2018	2018	Potentially ongoing	11700000	NA	NA	1.1421e+07	2.94096e+07	11700000	1.1421e+07	2.94096e+07	USD	2018	Effective
492	SC1508	NA	vanWilgen2017	An assessment of the evolution, costs and effectiveness of alien plant control operations in Kruger National Park, South Africa	van Wilgen, B.W., Fill, J.M., Govender, N., Foxcroft, L.C.	Alien plants were first recorded in 1937 in the 2 million ha Kruger National Park (KNP, a savanna protected area in South Africa), and attempts to control them began in the mid-1950s. The invasive alien plant control program expanded substantially in the late 1990s, but its overall efficacy has not been determined. We present an assessment of invasive alien plant control operations over several d…	2017	English	Peer-reviewed article	NA	Yes	Plantae	Tracheophyta	Magnoliopsida	Asterales	Asteraceae	Chromolaena	Chromolaena odorata	NA	Triffid weed	Terrestrial	terrestrial	N	NA	4	Y	Africa	South Africa	NA	Kruger National Park	Site	1997-2016	Period	1997	2016	1997	2016	Potentially ongoing	11800000	NA	NA	819284	2.04921e+06	590000	40964.2	102461	ZAR	2016	Effective
493	SC1509	NA	vanWilgen2017	An assessment of the evolution, costs and effectiveness of alien plant control operations in Kruger National Park, South Africa	van Wilgen, B.W., Fill, J.M., Govender, N., Foxcroft, L.C.	Alien plants were first recorded in 1937 in the 2 million ha Kruger National Park (KNP, a savanna protected area in South Africa), and attempts to control them began in the mid-1950s. The invasive alien plant control program expanded substantially in the late 1990s, but its overall efficacy has not been determined. We present an assessment of invasive alien plant control operations over several d…	2017	English	Peer-reviewed article	NA	Yes	Plantae	Tracheophyta	Magnoliopsida	Solanales	Solanaceae	Datura	Datura sp.	NA	Thornapple	Terrestrial	terrestrial	N	NA	4	Y	Africa	South Africa	NA	Kruger National Park	Site	1997-2016	Period	1997	2016	1997	2016	Potentially ongoing	11800000	NA	NA	819284	2.04921e+06	590000	40964.2	102461	ZAR	2016	Effective
494	SC1510	NA	vanWilgen2017	An assessment of the evolution, costs and effectiveness of alien plant control operations in Kruger National Park, South Africa	van Wilgen, B.W., Fill, J.M., Govender, N., Foxcroft, L.C.	Alien plants were first recorded in 1937 in the 2 million ha Kruger National Park (KNP, a savanna protected area in South Africa), and attempts to control them began in the mid-1950s. The invasive alien plant control program expanded substantially in the late 1990s, but its overall efficacy has not been determined. We present an assessment of invasive alien plant control operations over several d…	2017	English	Peer-reviewed article	NA	Yes	Plantae	Tracheophyta	Magnoliopsida	Asterales	Asteraceae	Parthenium	Parthenium hysterophorus	NA	Parthenium	Terrestrial	terrestrial	N	NA	4	Y	Africa	South Africa	NA	Kruger National Park	Site	1997-2016	Period	1997	2016	1997	2016	Potentially ongoing	11800000	NA	NA	819284	2.04921e+06	590000	40964.2	102461	ZAR	2016	Effective
495	SC1518	GS	NA	Tomato leafminer (Tuta absoluta): Impacts and coping strategies for Africa	Rwomushana et al.	The recently introduced tomato leafminer, Tuta absoluta, has become the most important pest constraint to tomato production in Africa. Spreading at an average 800 km/year, it is now present in 41 African countries. The socio-economic impacts of Tuta absoluta were assessed through a household survey in Kenya and Zambia in 2018, covering 400 respondents in Kenya and 426 in Zambia. We found that 97.…	2019	English	Working paper	NA	Yes	Animalia	Arthropoda	Insecta	Lepidoptera	Gelechiidae	Tuta	Tuta absoluta	NA	Tomato leafminer or Tuta absoluta	Terrestrial	terrestrial	N	NA	12b	N	Africa	Senegal	NA	NA	Country	2018	Year	2018	2018	2018	2018	Potentially ongoing	12500000	NA	NA	1.2202e+07	3.03257e+07	12500000	1.2202e+07	3.03257e+07	USD	2018	Effective
496	SC1527	NA	Wise2012	Costs, benefits and management options for an invasive alien tree species: The case of mesquite in the Northern Cape, South Africa	Wise, R.M., van Wilgen, B.W., Le Maitre, D. C.	Mesquite (Prosopis species) were introduced to South Africa to provide fodder and shade for livestock, but some have become invasive, impacting on water and grazing resources. Mesquiteâ€™s net economic effects are unclear and their unequal distribution leads to conflict. We estimated the value of mesquite invasions in the Northern Cape Province for different scenarios, differentiating between pro…	2012	English	Peer-reviewed article	Department of Water Affairs and Forestry, 2008. Working for Water Information Management System (WIMS) e 2001 to 2006 Data for All Prosopis Operations in South Africa, Cape Town. Department of Water Affairs and Forestry (DWAF).	Yes	Plantae	Tracheophyta	Magnoliopsida	Fabales	Fabaceae	Prosopis	Prosopis sp.	NA	Mesquite	Terrestrial	terrestrial	N	NA	NA	N	Africa	South Africa	NA	Northern Cape	Unit(116,153 ha)	2010-2041	Year	2010	2041	2010	2041	Potentially ongoing	13000000	NA	NA	1.38791e+07	2.31057e+07	13000000	1.38791e+07	2.31057e+07	USD	2012	Publication year
497	SC1529	NA	LeMaitre2002	Invasive alien trees and water resources in South Africa: case studies of the costs and benefits of management	Le Maitre, D. C., van Wilgen, B.W., Gelderblom, C. M., Bailey, C., Chapman, R.A. and Nel, J.A.	Invasive alien plants are consumptive water-users, and may have reduced river flows in South Africa by about 6.7% according to a broad-scale study. An effective programme to bring the invasions under control would cost about US$ 92 million per year for the next 20 years. This paper reports on studies of four representative catchments (the Sonderend, Keurbooms, Upper Wilge and Sabie-Sand) to asses…	2002	English	Peer-reviewed article	NA	Yes	Plantae	Tracheophyta	Magnoliopsida/Pinopsida	Fabales/Proteales/Pinales/Rosales/Myrtales/Caryophyllales/Malpighiales	Fabaceae/Proteaceae/Cactaceae/Pinaceae/Rosaceae/Salicaceae/Myrtaceae	Pinus/Hakea/Eucalyptus/Acacia/Populus/Salix/Rubus/Opuntia	Pinus sp./Hakea sp./Eucalyptus sp./Acacia sp./Populus sp./Salix sp./Rubus sp./Opuntia sp.	NA	Cluster pine; Monterey pine; Silky hakea; Sugar Gum; Black wattle; Port Jackson willow; Rooikrantz; Long-leaf acacia; Poplar; Willow; Brambles; Prickly pear	Terrestrial	terrestrial	N	NA	NA	N	Africa	South Africa	NA	Sonderend	Unit (2242 km2)	2000	Period	2000	2000	2000	2000	One-time	13200000	NA	NA	1.79879e+07	5.97769e+07	13200000	1.79879e+07	5.97769e+07	USD	2002	Publication year
498	SC1535	NA	vanWilgen2016	Historical costs and projected future scenarios for the management of invasive alien plants in protected areas in the Cape Floristic Region	van Wilgen, B.W., Fill, J.M., Baard, J., Cheney, C., Forsyth, A.T. and Kraaij, T.	Scarce funds for conservation need to be optimally used, yet there are few studies that record the costs and projected outcomes of major conservation efforts. Here we document the historical costs and extent of efforts to control invasive alien plants in the protected areas of the Cape Floristic Region of South Africa, a biodiversity hotspot of global importance. We also estimate the resources th…	2016	English	Peer-reviewed article	NA	Yes	Plantae	Tracheophyta	Magnoliopsida	Myrtales	Myrtaceae	Leptospermum	Leptospermum sp.	NA	Myrtles	Terrestrial	terrestrial	N	NA	NA	Y	Africa	South Africa	NA	Western Cape Province	Unit (750 000 ha)	1995â€“2015	Period	1995	2015	1995	2015	One-time	13900000	NA	NA	1.12668e+06	2.59216e+06	661905	53651.2	123436	ZAR	2015	Effective
499	SC1542	NA	7870	An assessment of the effectiveness of a large, national-scale invasive alien plant control strategy in South Africa	van Wilgen, B. W., Forsyth, G. G., Le Maitre, D. C. , Wannenburgh, A., Kotze, J. D. F., van den Berg, E., Henderson, L.	This paper presents an assessment of a large, national-scale alien plant control program that has operated in South Africa for 15 years. We reviewed data from three national-level estimates of the extent of invasion, records of the costs and spatial extent of invasive species control operations, assessments of the effectiveness of biological control, and smaller-scale studies. The 19 most importa…	2012	English	Peer-reviewed article	NA	Yes	Plantae	Tracheophyta	Pinopsida	Pinales	Pinaceae	Pinus	Pinus spp.	NA	Pines	Terrestrial	terrestrial	N	Forest biome	1	N	Africa	South Africa	NA	Forest Biome	Site	1995-2008	Period	1995	2008	1995	2009	Potentially ongoing	14200000	NA	NA	1.95692e+06	3.96353e+06	946667	130461	264235	ZAR	2008	Effective
[truncated: 219 more rows]
[truncated: 27 more columns]

## Sheet: Expanded_data
	Impact_year	Cost_ID	Repository	Reference_ID	Reference_title	Authors	Abstract	Publication_year	Language	Type_of_material	Previous_materials	Availability	Kingdom	Phylum	Class	Order	Family	Genus	Species	Subspecies	Common_name	Environment	Environment_IAS	Island	verbatimHabitat	Habitat	protectedArea	Geographic_region	Official_country	State.Province.Administrative_area	Location	Spatial_scale	Period_of_estimation	Time_range	Probable_starting_year	Probable_ending_year	Probable_starting_year_adjusted	Probable_ending_year_adjusted	Occurrence	Raw_cost_estimate_local_currency	Min_Raw_cost_estimate_local_currency	Max_Raw_cost_estimate_local_currency	Raw_cost_estimate_2017_USD_exchange_rate	Raw_cost_estimate_2017_USD_PPP	Cost_estimate_per_year_local_currency	Cost_estimate_per_year_2017_USD_exchange_rate	Cost_estimate_per_year_2017_USD_PPP	Currency	Applicable_year
[truncated: 4,259 more rows]
[truncated: 31 more columns]
